# Supplementary material for: Copper-catalyzed O-arylation of phenols with diazonium salts
Source: Royal Society of Chemistry journal article supplement (doi:10.1039/d3gc02541a), 2023-01-01

## Copper-catalyzed O-arylation of phenols with diazonium salts

Xin Fang,<sup>a</sup> Chengning Qi,<sup>a</sup> Xiangqian Cao,<sup>a</sup> Zhi-Gang Ren,<sup>a</sup> David James Young,<sup>b</sup> and  
Hong-Xi Li<sup>\*a</sup>

<sup>a</sup>College of Chemistry, Chemical Engineering and Materials Science, Soochow  
University, Suzhou 215123, China

<sup>b</sup>Glasgow College UESTC, University of Electronic Science and Technology of China,  
Chengdu, China

## Table of Contents

|                                                                                                     |            |
|-----------------------------------------------------------------------------------------------------|------------|
| <b>1. General information.....</b>                                                                  | <b>S1</b>  |
| <b>2. General procedures for the synthesis of ethers from diazonium salts<br/>and phenols .....</b> | <b>S1</b>  |
| <b>3. Electrochemical data.....</b>                                                                 | <b>S2</b>  |
| <b>4. Radical intermediate trapping study.....</b>                                                  | <b>S4</b>  |
| <b>5. NMR data of products .....</b>                                                                | <b>S8</b>  |
| <b>6. References .....</b>                                                                          | <b>S30</b> |
| <b>7. NMR spectra.....</b>                                                                          | <b>S32</b> |

## 1. General information

Aryl diazonium salts were synthesized using literature procedures.<sup>1</sup> All other reagents were used as purchased (from Adamas, Aladdin, Macklin, Energy, J&K Scientific) without further purification and solvents were dried according to standard procedures. The vessel material was borosilicate glass. Thin layer chromatography (TLC) employed glass 0.9 mm silica gel plates. Flash chromatography columns were packed with 300-400 mesh silica gel in petroleum ether (PE, b.p. = 60–90 °C). Gradient flash chromatography was conducted eluting with a continuous gradient from PE to ethyl acetate (EA). <sup>1</sup>H, <sup>13</sup>C and <sup>19</sup>F NMR spectra were recorded at ambient temperature on an AVANCE NEO 400 MHz spectrometer. High-performance liquid chromatography (HPLC) was conducted on a LC-20AT using biphenyl as the internal standard with MeOH and H<sub>2</sub>O as the mobile phase. High resolution mass spectra (HRMS) were obtained with a MICRO TOF-Q III. Attenuated Total Reflection Fourier Transform Infrared (ATR-FTIR) spectra were recorded on a VERTEX 70+HYPERION 2000 spectrometer using a diamond zinc selenide composite crystal (4000-400 cm<sup>-1</sup>).

## 2. General procedures for the synthesis of ethers from diazonium salts and phenols

Under a nitrogen atmosphere, phenol (0.5 mmol, 1.0 equiv), aryl diazonium salt (1.0 mmol, 2.0 equiv), [Cu(MeCN)<sub>4</sub>]BF<sub>4</sub> (31.4 mg, 0.1 mmol, 20 mol %), 2,4,6-collidine (24.2 mg, 0.2 mmol, 40 mol %), Na<sub>2</sub>CO<sub>3</sub> (106.0 mg, 1 mmol, 2.0 equiv), and degassed MeCN (2.5 mL) were introduced in to a 10 mL test tube equipped with a stirring bar. The reaction mixture was stirred for 6 h at room temperature. Next, 3 mL of water was added, and the mixture was extracted three times with ethyl acetate (3 × 3 mL). The combined organic layer was washed three times with brine, dried over anhydrous Na<sub>2</sub>SO<sub>4</sub>, and concentrated under reduced pressure. The pure product was obtained by flash column chromatography on silica gel or thin-layer chromatography (TLC) using petroleum ether (PE) and ethyl acetate (EA) as the eluent.

### 3. Electrochemical data

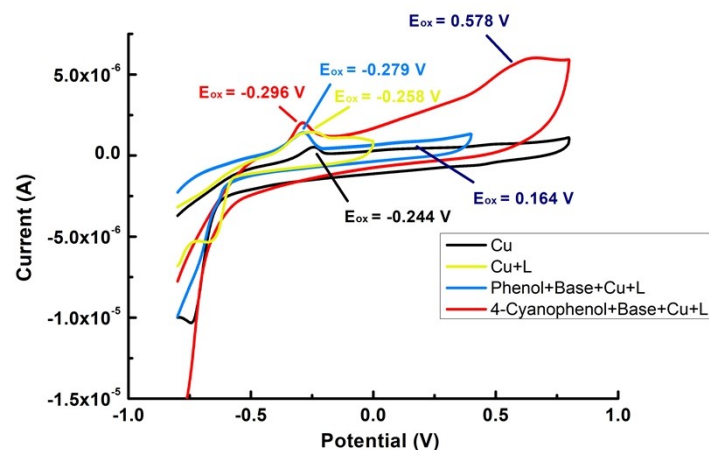

**Fig. S1.** Cyclic voltammogram of phenols ( $10^{-3}$  mol/L),  $\text{Na}_2\text{CO}_3$  ( $2 \times 10^{-3}$  mol/L),  $\text{CuOTf} \cdot 0.5\text{C}_6\text{H}_6$  ( $2 \times 10^{-4}$  mol/L) and 2,4,6-collidine ( $4 \times 10^{-4}$  mol/L) in dry  $\text{CH}_3\text{CN}$  using  $(n\text{-Bu})_4\text{NPF}_6$  (0.075 mol/L) as the electrolyte. Sweep rate: 100 mV/s. Working electrode: glassy carbon electrode; Counter electrode: platinum wire; Reference electrode: saturated calomel electrode (SCE).

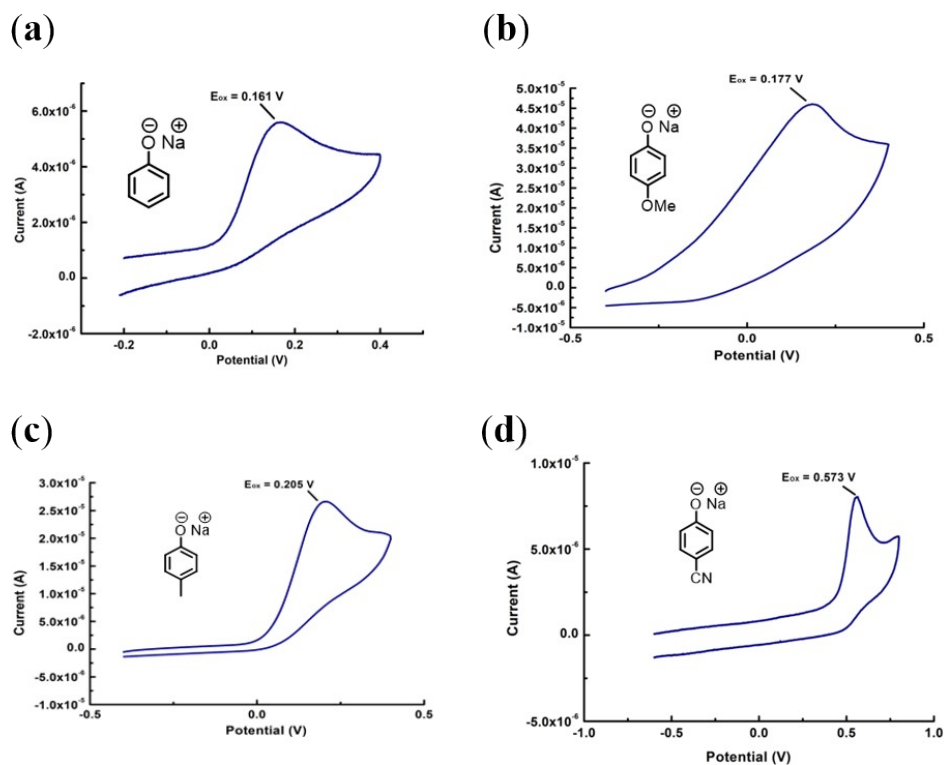

**Fig. S2.** Cyclic voltammogram of phenol ( $10^{-3}$  mol/L) and  $\text{Na}_2\text{CO}_3$  ( $2 \times 10^{-3}$  mol/L) in dry  $\text{CH}_3\text{CN}$  using  $(n\text{-Bu})_4\text{NPF}_6$  (0.075 mol/L) as the electrolyte. Sweep rate: 100 mV/s. Working electrode: glassy carbon electrode; Counter electrode: platinum wire; Reference electrode: saturated calomel electrode (SCE).

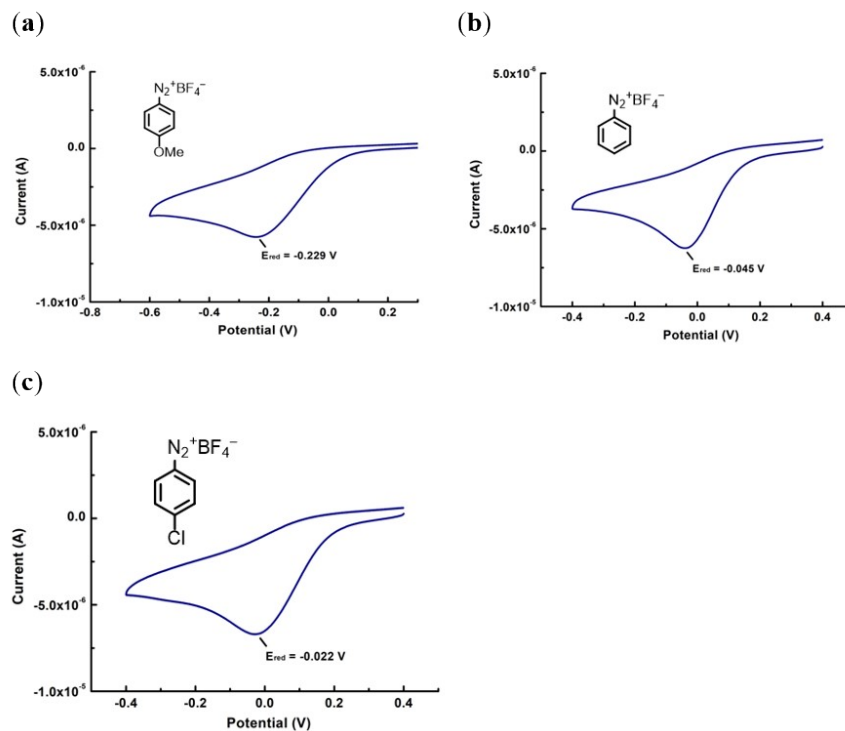

**Fig. S3.** Cyclic voltammogram of diazonium Salts ( $10^{-3}$  mol/L) in dry CH<sub>3</sub>CN using (n-Bu)<sub>4</sub>NPF<sub>6</sub> (0.075 mol/L) as the electrolyte. Sweep rate: 100 mV/s. Working electrode: glassy carbon electrode; Counter electrode: platinum wire; Reference electrode: saturated calomel electrode (SCE).

#### 4. Radical intermediate trapping study

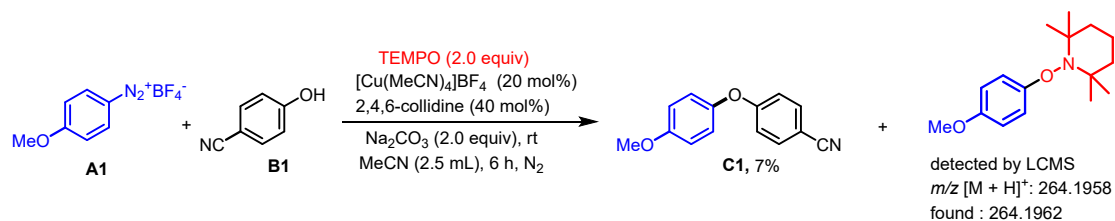

To a 10 mL glass tube equipped with a stirring bar was added **B1** (0.5 mmol, 1.0 equiv), **A1** (1.0 mmol, 2.0 equiv),  $[\text{Cu}(\text{MeCN})_4]\text{BF}_4$  (0.1 mmol, 20 mol %), 2,4,6-collidine (0.2 mmol, 40 mol %),  $\text{Na}_2\text{CO}_3$  (1.0 mmol, 2.0 equiv), TEMPO (1.0 mmol, 2.0 equiv) and degassed anhydrous MeCN (2.5 mL) under nitrogen. The mixture was stirred at room temperature for 6 h. The reaction mixture was then analyzed by HRMS.

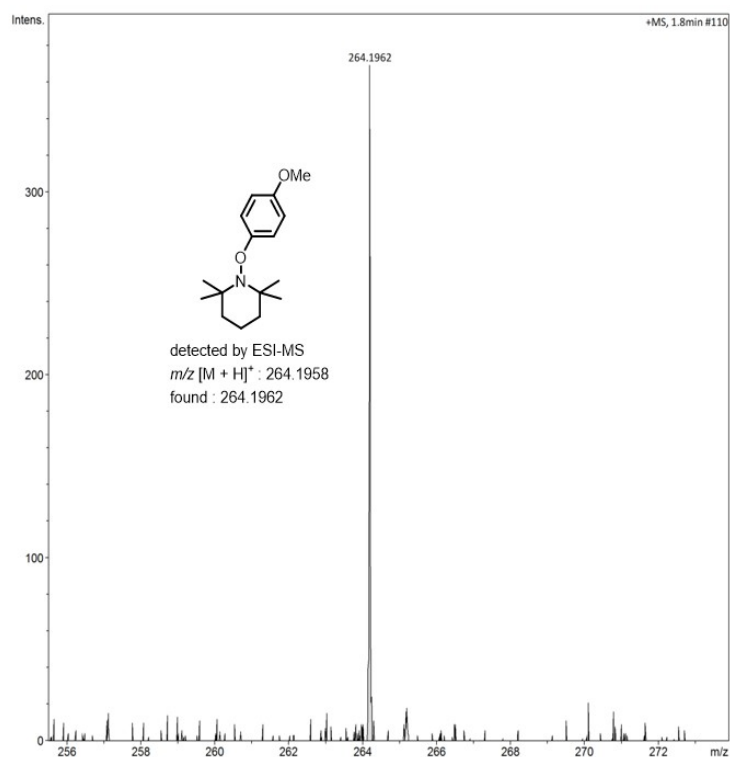

**Fig. S4.** The EI-MS spectrum of 1-(4-methoxyphenoxy)-2,2,6,6-tetramethylpiperidine.

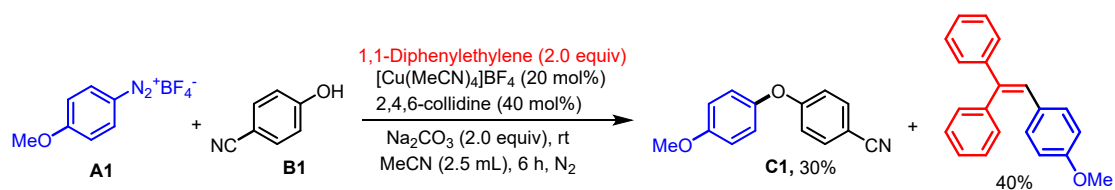

To a 10 mL glass tube equipped with a stirring bar was added **B1** (0.5 mmol, 1.0 equiv), **A1** (1.0 mmol, 2.0 equiv),  $[\text{Cu}(\text{MeCN})_4]\text{BF}_4$  (0.1 mmol, 20 mol %), 2,4,6-collidine (0.2 mmol, 40 mol %),  $\text{Na}_2\text{CO}_3$  (1.0 mmol, 2.0 equiv), 1,1-Diphenylethylene (1.0 mmol, 2.0 equiv) and degassed anhydrous MeCN (2.5 mL) under nitrogen. The mixture was stirred at room temperature for 6 h. Pure (2-(4-methoxyphenyl)ethene-1,1-diyl)dibenzene as a yellow oil was obtained by column chromatography on silica gel using PE and EA (V/V = 50/1) as the eluent.  $^1\text{H NMR}$  (400 MHz,  $\text{CDCl}_3$ , ppm)  $\delta$  7.37–7.17 (m, 10H), 6.99–6.86 (m, 3H), 6.64 (d,  $J = 8.8$  Hz, 2H), 3.69 (s, 3H).

$^{13}\text{C NMR}$  (101 MHz,  $\text{CDCl}_3$ , ppm)  $\delta$  157.3, 142.5, 139.6, 139.5, 129.7, 129.4, 129.0, 127.7, 127.1, 126.6, 126.3, 126.2, 126.1, 112.4, 54.0.

HRMS (ESI<sup>+</sup>)  $m/z$   $[\text{M} + \text{Na}]^+$  Calcd for  $\text{C}_{21}\text{H}_{18}\text{ONa}^+$  309.1250; Found 309.1255.

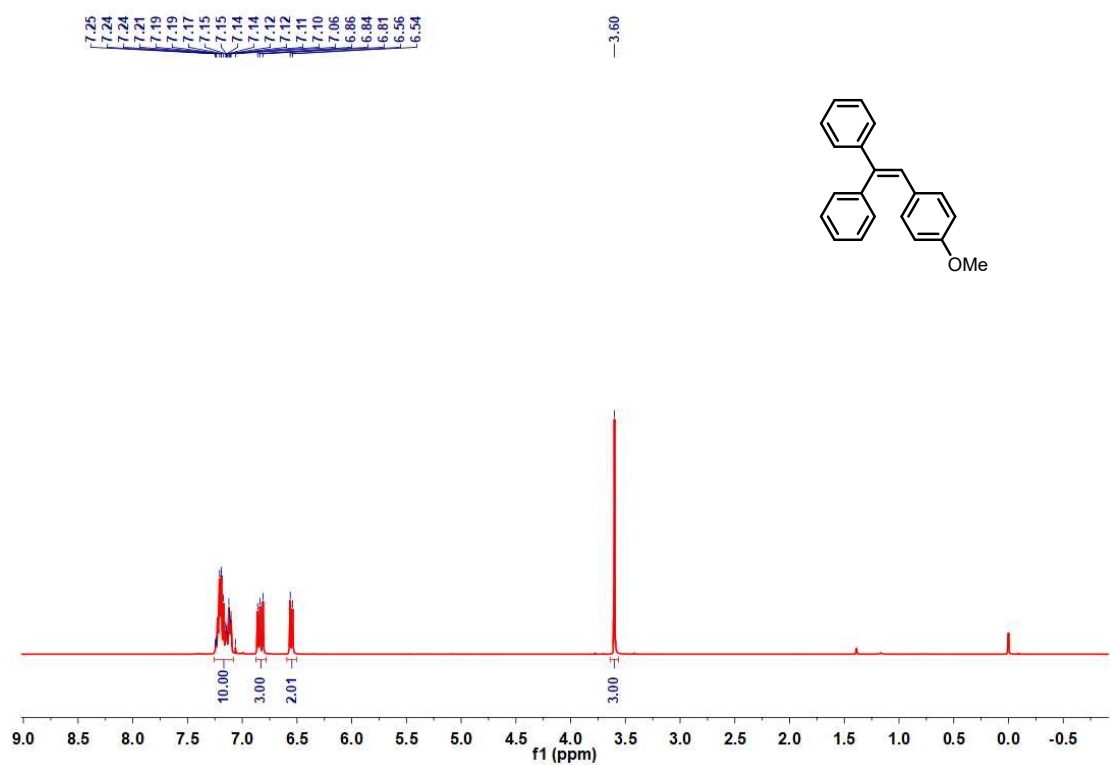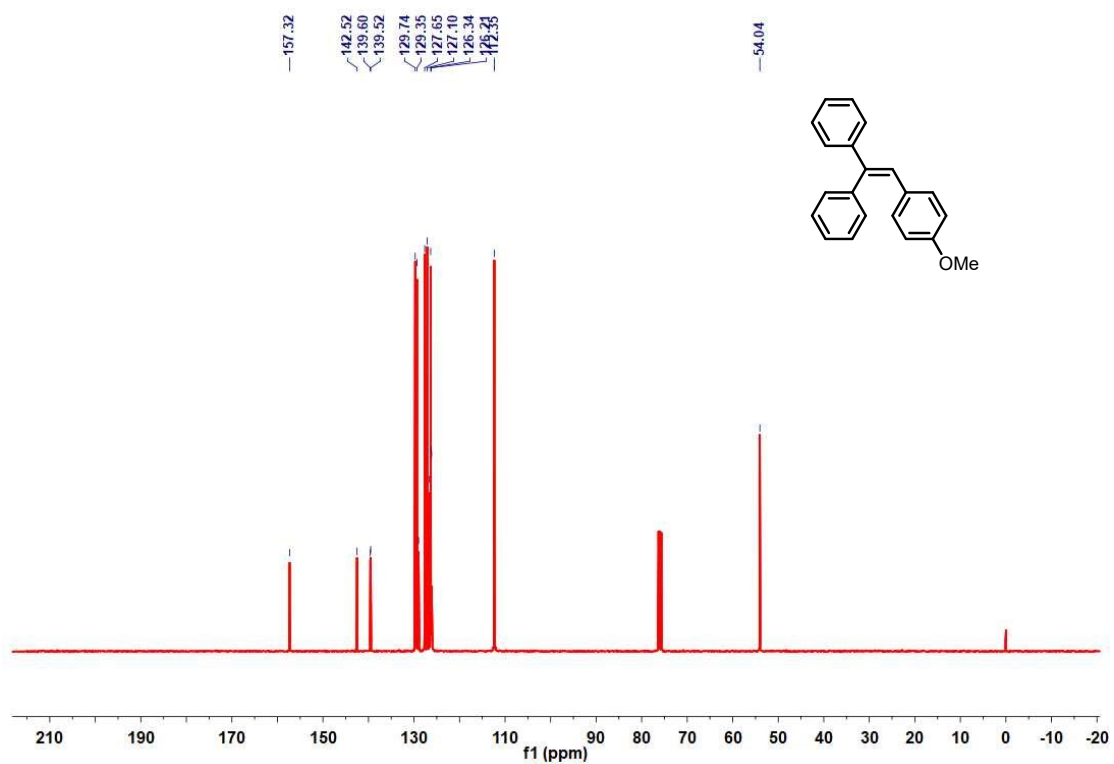

**Fig. S5.** The <sup>1</sup>H (400 MHz) and <sup>13</sup>C (101 MHz) NMR spectra for (2-(4-methoxyphenyl)ethene-1,1-diyl)dibenzene in CDCl<sub>3</sub>.



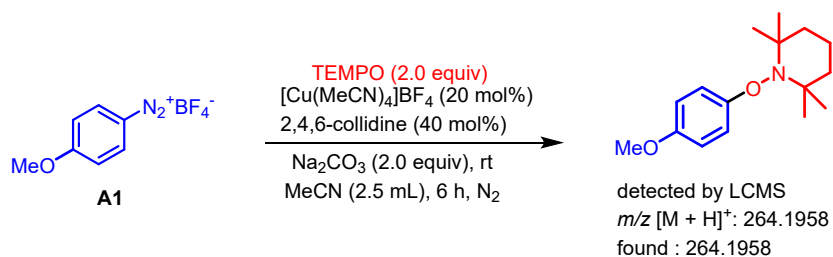

To a 10 mL glass tube equipped with a stirring bar was added **A1** (1.0 mmol, 2.0 equiv), [Cu(MeCN)<sub>4</sub>]BF<sub>4</sub> (0.1 mmol, 20 mol %), 2,4,6-collidine (0.2 mmol, 40 mol %), Na<sub>2</sub>CO<sub>3</sub> (1.0 mmol, 2.0 equiv), TEMPO (1.0 mmol, 2.0 equiv) and degassed anhydrous MeCN (2.5 mL) under nitrogen. The mixture was stirred at room temperature for 6 h. The reaction mixture was then analyzed by HRMS.

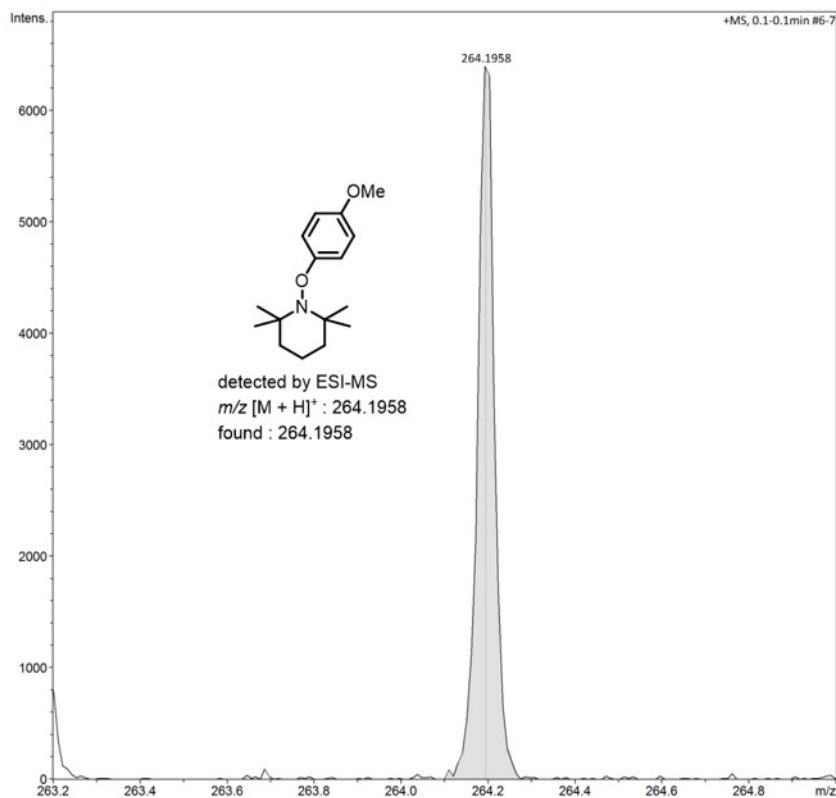

**Fig. S6.** The EI-MS spectrum of 1-(4-methoxyphenoxy)-2,2,6,6-tetramethylpiperidine.

## 5. NMR data of products

### 4-(4-methoxyphenoxy)benzonitrile (C1)<sup>S1</sup>

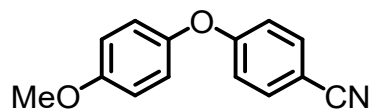

Purification by chromatography (PE/EA = 30:1) afforded **C1** as white solid, 99.1 mg, 88% yield. M.p. 106.0–107.1 °C.

<sup>1</sup>H NMR (400 MHz, CDCl<sub>3</sub>, ppm) δ 7.62–7.53 (m, 2H), 7.04–6.97 (m, 2H), 6.98–6.90 (m, 4H), 3.82 (s, 3H).

<sup>13</sup>C NMR (101 MHz, CDCl<sub>3</sub>, ppm) δ 162.5, 157.0, 147.9, 134.1, 121.8, 119.0, 117.1, 115.2, 105.4, 55.7.

HRMS (ESI<sup>+</sup>) *m/z* [M + H]<sup>+</sup> Calcd for C<sub>14</sub>H<sub>12</sub>NO<sub>2</sub><sup>+</sup> 226.0863; Found 226.0864.

### 4-phenoxybenzonitrile (C2)<sup>S2</sup>

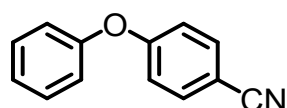

Purification by chromatography (PE/EA = 50:1) afforded **C2** as yellow oil, 85.9 mg, 88% yield.

<sup>1</sup>H NMR (400 MHz, CDCl<sub>3</sub>, ppm) δ 7.63–7.55 (m, 2H), 7.50–7.36 (m, 2H), 7.25–7.20 (m, 1H), 7.08–7.03 (m, 2H), 7.03–6.97 (m, 2H).

<sup>13</sup>C NMR (101 MHz, CDCl<sub>3</sub>, ppm) δ 161.7, 154.9, 134.1, 130.3, 125.2, 120.4, 118.9, 117.9, 105.9.

HRMS (ESI<sup>+</sup>) *m/z* [M + H]<sup>+</sup> Calcd for C<sub>13</sub>H<sub>10</sub>NO<sup>+</sup> 196.0757; Found 196.0757.

### 4-(*p*-tolylloxy)benzonitrile (C3)<sup>S3</sup>

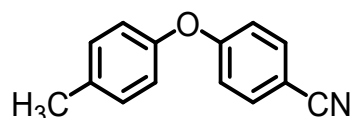

Purification by chromatography (PE/EA = 50:1) afforded **C3** as white solid, 87.8 mg, 84% yield. M.p. 69.9–70.7 °C.

<sup>1</sup>H NMR (400 MHz, CDCl<sub>3</sub>, ppm) δ 7.63–7.52 (m, 2H), 7.20 (d, *J* = 8.1 Hz, 2H), 7.01–6.91 (m, 4H), 2.36 (s, 3H).

$^{13}\text{C}$  NMR (101 MHz,  $\text{CDCl}_3$ , ppm)  $\delta$  162.1, 152.4, 134.9, 134.1, 130.7, 120.4, 118.9, 117.6, 105.5, 20.8.

HRMS (ESI<sup>+</sup>)  $m/z$   $[\text{M} + \text{Na}]^+$  Calcd for  $\text{C}_{14}\text{H}_{11}\text{NONa}^+$  232.0733; Found 232.0735.

#### 4-(4-ethylphenoxy)benzonitrile (C4)<sup>S4</sup>

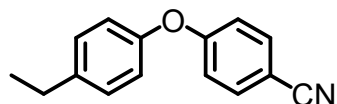

Purification by chromatography (PE/EA = 50:1) afforded **C4** as yellow oil, 89.2 mg, 80% yield.

$^1\text{H}$  NMR (400 MHz,  $\text{CDCl}_3$ , ppm)  $\delta$  7.60–7.54 (m, 2H), 7.23 (d,  $J$  = 8.5 Hz, 2H), 7.01–6.95 (m, 4H), 2.67 (q,  $J$  = 7.6 Hz, 2H), 1.26 (t,  $J$  = 7.6 Hz, 3H).

$^{13}\text{C}$  NMR (101 MHz,  $\text{CDCl}_3$ , ppm)  $\delta$  162.1, 152.5, 141.3, 134.1, 129.5, 120.4, 119.0, 117.6, 105.5, 28.3, 15.8.

HRMS (ESI<sup>+</sup>)  $m/z$   $[\text{M} + \text{H}]^+$  Calcd for  $\text{C}_{15}\text{H}_{14}\text{NO}^+$  224.1070; Found 224.1065.

#### 4-(4-isopropylphenoxy)benzonitrile (C5)

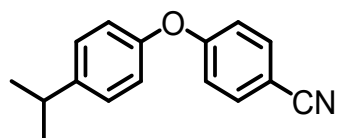

Purification by chromatography (PE/EA = 50:1) afforded **C5** as yellow oil, 101.9 mg, 86% yield.

$^1\text{H}$  NMR (400 MHz,  $\text{CDCl}_3$ , ppm)  $\delta$  7.63–7.55 (m, 2H), 7.28–7.23 (m, 2H), 7.02–6.95 (m, 4H), 2.94 (dt,  $J$  = 13.8, 6.9 Hz, 1H), 1.27 (d,  $J$  = 6.9 Hz, 6H).

$^{13}\text{C}$  NMR (101 MHz,  $\text{CDCl}_3$ , ppm)  $\delta$  162.1, 152.6, 145.9, 134.1, 128.1, 120.3, 119.0, 117.7, 105.5, 33.6, 24.1.

IR ( $\text{cm}^{-1}$ ): 2961, 2871, 2225, 1899, 1778, 1595, 1495, 1363, 1243, 1166, 1014, 948, 871, 833, 721, 684.

HRMS (ESI<sup>+</sup>)  $m/z$   $[\text{M} + \text{H}]^+$  Calcd for  $\text{C}_{16}\text{H}_{16}\text{NO}^+$  238.1226; Found 238.1222.

#### 4-(4-(tert-butyl)phenoxy)benzonitrile (C6)<sup>S5</sup>

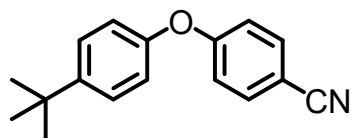

Purification by chromatography (PE/EA = 50:1) afforded **C6** as white solid, 115.5 mg, 92% yield. M.p. 89.1–90.4 °C.

<sup>1</sup>H NMR (400 MHz, CDCl<sub>3</sub>, ppm) δ 7.61–7.55 (m, 2H), 7.46–7.38 (m, 2H), 7.04–6.96 (m, 4H), 1.34 (s, 9H).

<sup>13</sup>C NMR (101 MHz, CDCl<sub>3</sub>, ppm) δ 162.0, 152.3, 148.2, 134.1, 127.1, 119.9, 119.0, 117.7, 105.5, 34.5, 31.5.

HRMS (ESI<sup>+</sup>) *m/z* [M + H]<sup>+</sup> Calcd for C<sub>17</sub>H<sub>18</sub>NO<sup>+</sup> 252.1383; Found 252.1387.

#### 4-(4-ethoxyphenoxy)benzonitrile (**C7**)

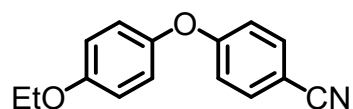

Purification by chromatography (PE/EA = 50:1) afforded **C7** as yellow solid, 108.8 mg, 91% yield. M.p. 88.7–89.1 °C.

<sup>1</sup>H NMR (400 MHz, CDCl<sub>3</sub>, ppm) δ 7.61–7.53 (m, 2H), 7.02–6.95 (m, 3H), 6.95–6.89 (m, 3H), 4.04 (q, *J* = 7.0 Hz, 2H), 1.43 (t, *J* = 7.0 Hz, 3H).

<sup>13</sup>C NMR (101 MHz, CDCl<sub>3</sub>, ppm) δ 162.5, 156.4, 147.7, 134.1, 121.88, 119.0, 117.1, 115.8, 105.2, 63.9, 14.8.

IR (cm<sup>-1</sup>): 3063, 2976, 2986, 2224, 1781, 1600, 1578, 1418, 1391, 1259, 3367, 1044, 920, 803, 771, 682.

HRMS (ESI<sup>+</sup>) *m/z* [M + H]<sup>+</sup> Calcd for C<sub>15</sub>H<sub>14</sub>NO<sub>2</sub><sup>+</sup> 240.1019; Found 240.1018.

#### 4-(4-acetylphenoxy)benzonitrile (**C8**)<sup>S6</sup>

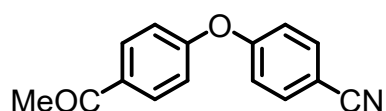

Purification by chromatography (PE/EA = 30:1) afforded **C8** as white solid, 84.2 mg, 71% yield. M.p. 101.8–102.9 °C.

<sup>1</sup>H NMR (400 MHz, CDCl<sub>3</sub>, ppm) δ 8.07–7.95 (m, 2H), 7.72–7.62 (m, 2H), 7.15–7.05 (m, 4H),

2.61 (s, 3H).

$^{13}\text{C}$  NMR (101 MHz,  $\text{CDCl}_3$ , ppm)  $\delta$  196.6, 160.0, 159.4, 134.4, 133.6, 130.8, 119.2, 119.2, 118.5, 107.3, 26.6.

HRMS (ESI<sup>+</sup>)  $m/z$   $[\text{M} + \text{H}]^+$  Calcd for  $\text{C}_{15}\text{H}_{12}\text{NO}_2^+$  238.0863; Found 238.0863.

#### 4-(4-fluorophenoxy)benzonitrile (C9)<sup>S7</sup>

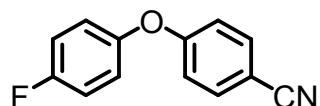

Purification by chromatography (PE/EA = 50:1) afforded **C9** as white solid, 46.9 mg, 44% yield. M.p. 59.3–60.0 °C.

$^1\text{H}$  NMR (400 MHz,  $\text{CDCl}_3$ , ppm)  $\delta$  7.64–7.57 (m, 2H), 7.16–7.07 (m, 2H), 7.07–7.01 (m, 2H), 7.00–6.94 (m, 2H).

$^{13}\text{C}$  NMR (101 MHz,  $\text{CDCl}_3$ , ppm)  $\delta$  161.8, 159.8 (d,  $J = 244.4$  Hz), 150.6, 134.2, 122.0 (d,  $J = 8.6$  Hz), 118.7, 117.6, 116.9 (d,  $J = 23.7$  Hz), 106.0.

$^{19}\text{F}$  NMR (377 MHz,  $\text{CDCl}_3$ , ppm)  $\delta$  -117.26.

HRMS (ESI<sup>+</sup>)  $m/z$   $[\text{M} + \text{H}]^+$  Calcd for  $\text{C}_{13}\text{H}_9\text{FNO}^+$  214.0663; Found 214.0662.

#### 4-(4-chlorophenoxy)benzonitrile (C10)<sup>S6</sup>

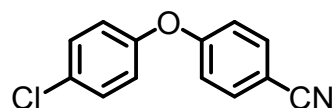

Purification by chromatography (PE/EA = 50:1) afforded **C10** as white solid, 79.0 mg, 69% yield. M.p. 84.7–85.4 °C.

$^1\text{H}$  NMR (400 MHz,  $\text{CDCl}_3$ , ppm)  $\delta$  7.66–7.58 (m, 2H), 7.42–7.33 (m, 2H), 7.05–6.97 (m, 4H).

$^{13}\text{C}$  NMR (101 MHz,  $\text{CDCl}_3$ , ppm)  $\delta$  161.2, 153.5, 134.2, 130.4, 130.3, 121.7, 118.7, 118.0, 106.4.

HRMS (ESI<sup>+</sup>)  $m/z$   $[\text{M} + \text{H}]^+$  Calcd for  $\text{C}_{13}\text{H}_9\text{ClNO}^+$  230.0367, 232.0338; Found 230.0364, 232.0340.

#### 4-(4-bromophenoxy)benzonitrile (C11)<sup>S8</sup>

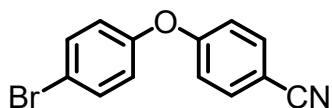

Purification by chromatography (PE/EA = 50:1) afforded **C11** as white solid, 57.3 mg, 45% yield. M.p. 79.3–79.8 °C.

$^1\text{H}$  NMR (400 MHz,  $\text{CDCl}_3$ , ppm)  $\delta$  7.61 (dd,  $J = 9.1, 2.1$  Hz, 2H), 7.55–7.48 (m, 2H), 7.04–6.98 (m, 2H), 6.98–6.92 (m, 2H).

$^{13}\text{C}$  NMR (101 MHz,  $\text{CDCl}_3$ , ppm)  $\delta$  161.1, 154.1, 134.3, 133.3, 122.1, 118.7, 118.1, 117.9, 106.4.

HRMS (ESI<sup>+</sup>)  $m/z$   $[\text{M} + \text{H}]^+$  Calcd for  $\text{C}_{13}\text{H}_9\text{BrNO}^+$  273.9862, 275.9842; Found 273.9861, 275.9840.

#### 4-(4-(trifluoromethyl)phenoxy)benzonitrile (**C12**)<sup>S9</sup>

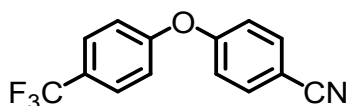

Purification by chromatography (PE/EA = 50:1) afforded **C12** as white solid, 98.6 mg, 75% yield. M.p. 59.0–60.0 °C.

$^1\text{H}$  NMR (400 MHz,  $\text{CDCl}_3$ , ppm)  $\delta$  7.66 (m, 4H), 7.15 (d,  $J = 8.5$  Hz, 2H), 7.11–7.05 (m, 2H).

$^{13}\text{C}$  NMR (101 MHz,  $\text{CDCl}_3$ , ppm)  $\delta$  160.2, 158.1, 134.4, 127.6 (q,  $J = 3.7$  Hz), 126.9 (q,  $J = 33.0$  Hz), 123.9 (q,  $J = 270.0$  Hz), 119.8, 119.0, 118.5, 107.3.

$^{19}\text{F}$  NMR (377 MHz,  $\text{CDCl}_3$ , ppm)  $\delta$  -62.0.

HRMS (ESI<sup>+</sup>)  $m/z$   $[\text{M} + \text{H}]^+$  Calcd for  $\text{C}_{14}\text{H}_9\text{F}_3\text{NO}^+$  264.0631; Found 264.0633.

#### 4,4'-oxydibenzonitrile (**C13**)<sup>S10</sup>

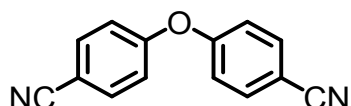

Purification by chromatography (PE/EA = 20:1) afforded **C13** as white solid, 67.1 mg, 61% yield. M.p. 172.2–173.8 °C.

$^1\text{H}$  NMR (400 MHz,  $\text{CDCl}_3$ , ppm)  $\delta$  7.80–7.58 (m, 4H), 7.21–7.03 (m, 4H).

$^{13}\text{C}$  NMR (101 MHz,  $\text{CDCl}_3$ , ppm)  $\delta$  159.2, 134.5, 119.7, 118.3, 108.1.

HRMS (ESI<sup>+</sup>) *m/z* [M + H]<sup>+</sup> Calcd for C<sub>14</sub>H<sub>9</sub>N<sub>2</sub>O<sup>+</sup> 221.0709; Found 221.0710.

**ethyl 4-(4-cyanophenoxy)benzoate (C14)**<sup>S1</sup>

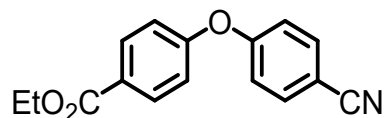

Purification by chromatography (PE/EA = 30:1) afforded **C14** as white solid, 86.8 mg, 65% yield. M.p. 62.2–63.9 °C.

<sup>1</sup>H NMR (400 MHz, CDCl<sub>3</sub>, ppm) δ 8.12–8.06 (m, 2H), 7.68–7.62 (m, 2H), 7.11–7.05 (m, 4H), 4.39 (q, *J* = 7.1 Hz, 2H), 1.40 (t, *J* = 7.1 Hz, 3H).

<sup>13</sup>C NMR (101 MHz, CDCl<sub>3</sub>, ppm) δ 165.7, 160.2, 159.1, 134.3, 132.0, 126.9, 119.2, 119.1, 118.5, 107.1, 61.1, 14.3.

HRMS (ESI<sup>+</sup>) *m/z* [M + H]<sup>+</sup> Calcd for C<sub>16</sub>H<sub>14</sub>NO<sub>3</sub><sup>+</sup> 268.0968; Found 268.0969.

**methyl 4-(4-cyanophenoxy)benzoate (C15)**<sup>S6</sup>

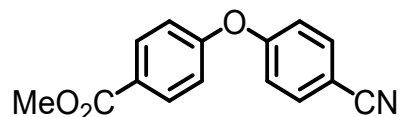

Purification by chromatography (PE/EA = 30:1) afforded **C15** as white solid, 74.6 mg, 59% yield. M.p. 101.1–102.6 °C.

<sup>1</sup>H NMR (400 MHz, CDCl<sub>3</sub>, ppm) δ 8.13–8.03 (m, 2H), 7.69–7.63 (m, 2H), 7.08 (dd, *J* = 8.8, 1.1 Hz, 4H), 3.93 (s, 3H).

<sup>13</sup>C NMR (101 MHz, CDCl<sub>3</sub>, ppm) δ 166.2, 160.2, 159.2, 134.3, 132.0, 126.5, 119.2, 119.2, 118.5, 107.3, 52.2.

HRMS (ESI<sup>+</sup>) *m/z* [M + H]<sup>+</sup> Calcd for C<sub>15</sub>H<sub>12</sub>NO<sub>3</sub><sup>+</sup> 254.0812; Found 254.0815.

**4-(*o*-tolylloxy)benzonitrile (C16)**<sup>S1</sup>

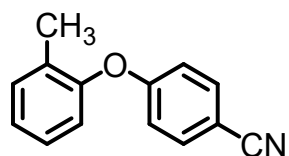

Purification by chromatography (PE/EA = 50:1) afforded **C16** as colorless oil, 67.9 mg, 65% yield.

<sup>1</sup>H NMR (400 MHz, CDCl<sub>3</sub>, ppm) δ 7.60–7.55 (m, 2H), 7.29 (dd, *J* = 7.4, 0.7 Hz, 1H), 7.23 (dd, *J* = 7.8, 1.5 Hz, 1H), 7.17 (td, *J* = 7.4, 1.2 Hz, 1H), 7.00–6.95 (m, 1H), 6.93–6.87 (m, 2H), 2.17 (s, 3H).

<sup>13</sup>C NMR (101 MHz, CDCl<sub>3</sub>, ppm) δ 161.8, 152.4, 134.2, 131.9, 130.6, 127.7, 125.7, 121.1, 119.0, 116.8, 105.3, 16.0.

HRMS (ESI<sup>+</sup>) *m/z* [M + H]<sup>+</sup> Calcd for C<sub>14</sub>H<sub>12</sub>NO<sup>+</sup> 210.0913; Found 210.0913.

#### 4-(2-methoxyphenoxy)benzonitrile (**C17**)<sup>S11</sup>

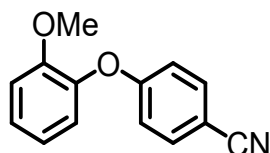

Purification by chromatography (PE/EA = 50:1) afforded **C17** as white solid, 104.6 mg, 93% yield. M.p. 88.3–89.4 °C.

<sup>1</sup>H NMR (400 MHz, CDCl<sub>3</sub>, ppm) δ 7.61–7.52 (m, 2H), 7.24 (m, 1H), 7.08 (dd, *J* = 7.9, 1.7 Hz, 1H), 7.03 (dd, *J* = 8.2, 1.3 Hz, 1H), 6.99 (m, 1H), 6.95–6.89 (m, 2H), 3.78 (s, 3H).

<sup>13</sup>C NMR (101 MHz, CDCl<sub>3</sub>, ppm) δ 161.9, 151.7, 142.6, 134.0, 126.7, 122.6, 121.4, 119.1, 116.6, 113.1, 105.2, 55.8.

HRMS (ESI<sup>+</sup>) *m/z* [M + Na]<sup>+</sup> Calcd for C<sub>14</sub>H<sub>11</sub>NO<sub>2</sub>Na<sup>+</sup> 248.0682; Found 248.0682.

#### 4-(2-(methylthio)phenoxy)benzonitrile (**C18**)

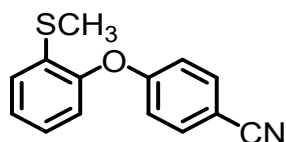

Purification by chromatography (PE/EA = 50:1) afforded **C18** as yellow solid, 71.1 mg, 59% yield. M.p. 100.0–101.4 °C.

<sup>1</sup>H NMR (400 MHz, CDCl<sub>3</sub>, ppm) δ 7.60–7.55 (m, 2H), 7.30 (dd, *J* = 7.8, 1.8 Hz, 1H), 7.28–7.23 (m, 1H), 7.19 (td, *J* = 7.6, 1.8 Hz, 1H), 7.00 (dd, *J* = 7.9, 1.3 Hz, 1H), 6.96–6.91 (m, 2H), 2.41 (s, 3H).



$^{13}\text{C}$  NMR (101 MHz,  $\text{CDCl}_3$ , ppm)  $\delta$  161.2, 151.0, 134.1, 132.1, 127.0, 126.3, 126.3, 121.3, 118.9, 117.1, 105.8, 14.7.

IR ( $\text{cm}^{-1}$ ): 3062, 2958, 2224, 2168, 1705, 1662, 1569, 1499, 1434, 1242, 1195, 1032, 965, 816, 765, 689.

HRMS (ESI $^+$ )  $m/z$   $[\text{M} + \text{H}]^+$  Calcd for  $\text{C}_{14}\text{H}_{12}\text{SO}^+$  242.0634; Found 242.0635.

#### 4-(2-chlorophenoxy)benzonitrile (C19)

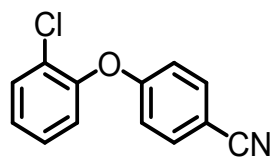

Purification by chromatography (PE/EA = 50:1) afforded **C19** as yellow oil, 58.4 mg, 51% yield.

$^1\text{H}$  NMR (400 MHz,  $\text{CDCl}_3$ , ppm)  $\delta$  7.62–7.57 (m, 2H), 7.50 (dd,  $J$  = 8.0, 1.6 Hz, 1H), 7.32 (td,  $J$  = 7.8, 1.6 Hz, 1H), 7.22 (td,  $J$  = 7.8, 1.6 Hz, 1H), 7.13 (dd,  $J$  = 8.0, 1.5 Hz, 1H), 6.97–6.91 (m, 2H).

$^{13}\text{C}$  NMR (101 MHz,  $\text{CDCl}_3$ , ppm)  $\delta$  160.9, 150.1, 134.2, 131.2, 128.5, 127.0, 126.7, 122.8, 118.7, 117.1, 106.1.

IR ( $\text{cm}^{-1}$ ): 2226, 1964, 1605, 1580, 1499, 14142, 1239, 1164, 1125, 1058, 945, 835, 760, 677.

HRMS (ESI $^+$ )  $m/z$   $[\text{M} + \text{H}]^+$  Calcd for  $\text{C}_{13}\text{H}_9\text{ClNO}^+$  230.0367, 232.0338; Found 230.0368, 232.0340.

#### 4-(2-chloro-4-methylphenoxy)benzonitrile (C20)<sup>S12</sup>

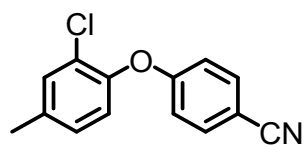

Purification by chromatography (PE/EA = 50:1) afforded **C20** as white solid, 70.5 mg, 58% yield. M.p. 87.0–87.6 °C.

$^1\text{H}$  NMR (400 MHz,  $\text{CDCl}_3$ , ppm)  $\delta$  7.66–7.49 (m, 2H), 7.25 (d,  $J$  = 8.3 Hz, 1H), 7.08 (d,  $J$  = 2.4 Hz, 1H), 7.03–6.96 (m, 2H), 6.88 (dd,  $J$  = 8.3, 2.5 Hz, 1H), 2.37 (s, 3H).

$^{13}\text{C}$  NMR (101 MHz,  $\text{CDCl}_3$ , ppm)  $\delta$  161.3, 153.3, 135.3, 134.2, 133.0, 132.0, 121.1, 118.7,

118.7, 117.9, 106.2, 19.5.

HRMS (ESI<sup>+</sup>) *m/z* [M + Na]<sup>+</sup> Calcd for C<sub>14</sub>H<sub>10</sub>CINa<sup>+</sup> 266.0343, 268.0314; Found 266.0341, 268.0310.

#### 4-([1,1'-biphenyl]-2-yloxy)benzonitrile (C21)<sup>S13</sup>

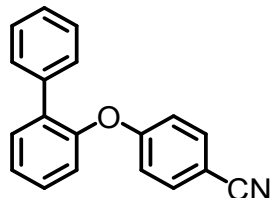

Purification by chromatography (PE/EA = 30:1) afforded **C21** as yellow solid, 74.6 mg, 55% yield. M.p. 125.6–126.4 °C.

<sup>1</sup>H NMR (400 MHz, CDCl<sub>3</sub>, ppm) δ 7.51–7.45 (m, 3H), 7.44–7.40 (m, 2H), 7.40–7.37 (m, 1H), 7.36–7.29 (m, 3H), 7.29–7.25 (m, 1H), 7.11 (dd, *J* = 7.9, 1.4 Hz, 1H), 6.92–6.81 (m, 2H).

<sup>13</sup>C NMR (101 MHz, CDCl<sub>3</sub>, ppm) δ 161.7, 151.3, 137.0, 134.8, 134.0, 131.7, 129.2, 129.0, 128.3, 127.6, 126.0, 121.8, 119.0, 117.3, 105.3.

HRMS (ESI<sup>+</sup>) *m/z* [M + H]<sup>+</sup> Calcd for C<sub>19</sub>H<sub>14</sub>NO<sup>+</sup> 272.1070; Found 272.1070.

#### 4-(2,6-dimethylphenoxy)benzonitrile (C22)<sup>S14</sup>

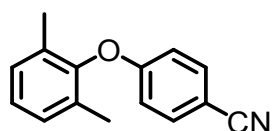

Purification by chromatography (PE/EA = 30:1) afforded **C22** as colorless oil, 78.1 mg, 70% yield.

<sup>1</sup>H NMR (400 MHz, CDCl<sub>3</sub>, ppm) δ 7.70 (d, *J* = 8.7 Hz, 2H), 7.35 (d, *J* = 8.5 Hz, 2H), 6.98 (d, *J* = 7.7 Hz, 2H), 6.89–6.83 (m, 1H), 2.03 (s, 6H).

<sup>13</sup>C NMR (101 MHz, CDCl<sub>3</sub>, ppm) δ 159.9, 156.5, 133.6, 128.0, 127.1, 123.5, 123.2, 118.6, 109.0, 18.1.

HRMS (ESI<sup>+</sup>) *m/z* [M + H]<sup>+</sup> Calcd for C<sub>15</sub>H<sub>14</sub>NO<sup>+</sup> 224.1070; Found 224.1071.

#### 4-(benzo[d]thiazol-5-yloxy)benzonitrile (C23)

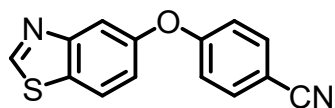

Purification by chromatography (PE/EA = 10:1) afforded **C23** as white solid, 69.3 mg, 55% yield. M.p. 85.7–86.5 °C.

<sup>1</sup>H NMR (400 MHz, CDCl<sub>3</sub>, ppm) δ 9.07 (s, 1H), 7.99 (d, *J* = 8.7 Hz, 1H), 7.83 (d, *J* = 2.3 Hz, 1H), 7.67–7.58 (m, 2H), 7.22 (dd, *J* = 8.7, 2.3 Hz, 1H), 7.10–7.03 (m, 2H).

<sup>13</sup>C NMR (101 MHz, CDCl<sub>3</sub>, ppm) δ 161.5, 156.1, 154.6, 153.8, 134.3, 130.3, 123.1, 119.1, 118.7, 118.1, 114.8, 106.3.

IR (cm<sup>-1</sup>): 3074, 2918, 2850, 2223, 1728, 1644, 1553, 1465, 1234, 1118, 951, 822, 704, 644.

HRMS (ESI<sup>+</sup>) *m/z* [M + Na]<sup>+</sup> Calcd for C<sub>14</sub>H<sub>8</sub>SN<sub>2</sub>O<sub>n</sub>a<sup>+</sup> 275.0250; Found 275.0251.

#### 4-((1-methyl-1H-pyrazol-3-yl)oxy)benzonitrile (C24)

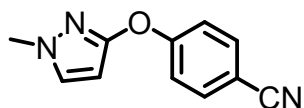

Purification by chromatography (PE/EA = 10:1) afforded **C24** as white solid, 49.7 mg, 50% yield. M.p. 69.0–70.4 °C.

<sup>1</sup>H NMR (400 MHz, CDCl<sub>3</sub>, ppm) δ 7.63–7.57 (m, 2H), 7.31 (d, *J* = 2.3 Hz, 1H), 7.19–7.14 (m, 2H), 5.88 (d, *J* = 2.3 Hz, 1H), 3.84 (s, 3H).

<sup>13</sup>C NMR (101 MHz, CDCl<sub>3</sub>, ppm) δ 160.8, 158.4, 134.0, 131.8, 118.9, 117.7, 106.2, 94.8, 39.4.

IR (cm<sup>-1</sup>): 3069, 2922, 2226, 1908, 1861, 1778, 1642, 1604, 1527, 1467, 1303, 1208, 1164, 1048, 971, 839, 751, 685.

HRMS (ESI<sup>+</sup>) *m/z* [M + H]<sup>+</sup> Calcd for C<sub>11</sub>H<sub>10</sub>N<sub>3</sub>O<sup>+</sup> 200.0818; Found 200.0816.

#### 4-((4-methyl-2-oxo-2H-chromen-7-yl)oxy)benzonitrile (C25)

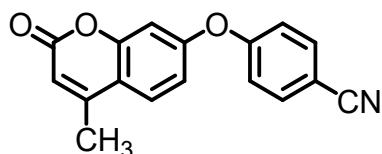

Purification by chromatography (PE/EA = 10:1) afforded **C25** as white solid, 85.8 mg, 62% yield. M.p. 189.8–190.7 °C.

<sup>1</sup>H NMR (400 MHz, CDCl<sub>3</sub>, ppm) δ 7.71–7.66 (m, 2H), 7.65–7.59 (m, 1H), 7.16–7.08 (m, 2H),

7.03–6.96 (m, 2H), 6.26 (d,  $J = 1.1$  Hz, 1H), 2.45 (s, 3H).

$^{13}\text{C}$  NMR (101 MHz,  $\text{CDCl}_3$ , ppm)  $\delta$  160.4, 159.8, 158.3, 155.0, 151.9, 134.4, 126.3, 119.3, 118.4, 116.8, 115.6, 114.0, 107.7, 107.6, 18.7.

IR ( $\text{cm}^{-1}$ ): 3056, 2956, 2226, 1933, 1716. 1614. 1495 1389, 1270, 1170, 1066, 983, 888, 793, 656.

HRMS (ESI<sup>+</sup>)  $m/z$   $[\text{M} + \text{H}]^+$  Calcd for  $\text{C}_{17}\text{H}_{12}\text{NO}_3^+$  278.0812; Found 278.0811.

#### 1-(4-(4-methoxyphenoxy)phenyl)ethan-1-one (C26)<sup>S4</sup>

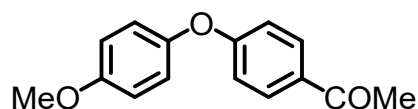

Purification by chromatography (PE/EA = 30:1) afforded **C26** as white solid, 96.8 mg, 80% yield. M.p. 57.5–58.2 °C.

$^1\text{H}$  NMR (400 MHz,  $\text{CDCl}_3$ , ppm)  $\delta$  7.95–7.86 (m, 2H), 7.07–6.98 (m, 2H), 6.96–6.89 (m, 4H), 3.83 (s, 3H), 2.56 (s, 3H).

$^{13}\text{C}$  NMR (101 MHz,  $\text{CDCl}_3$ , ppm)  $\delta$  196.8, 163.0, 156.7, 148.5, 131.4, 130.6, 121.7, 116.4, 115.1, 55.7, 26.4.

HRMS (ESI<sup>+</sup>)  $m/z$   $[\text{M} + \text{H}]^+$  Calcd for  $\text{C}_{15}\text{H}_{15}\text{O}_3^+$  243.1016; Found 243.1019.

#### 1-(4-(4-methoxyphenoxy)phenyl)propan-1-one (C27)<sup>S15</sup>

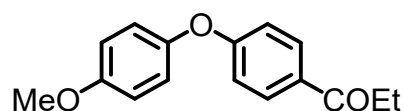

Purification by chromatography (PE/EA = 30:1) afforded **C27** as yellow solid, 99.9 mg, 78% yield. M.p. 63.6–64.6 °C.

$^1\text{H}$  NMR (400 MHz,  $\text{CDCl}_3$ , ppm)  $\delta$  7.95–7.89 (m, 2H), 7.07–6.98 (m, 2H), 6.96–6.88 (m, 4H), 3.82 (s, 3H), 2.95 (q,  $J = 7.3$  Hz, 2H), 1.21 (t,  $J = 7.3$  Hz, 3H).

$^{13}\text{C}$  NMR (101 MHz,  $\text{CDCl}_3$ , ppm)  $\delta$  199.5, 162.7, 156.7, 148.6, 131.1, 130.2, 121.7, 116.4, 115.1, 55.7, 31.5, 8.4.

HRMS (ESI<sup>+</sup>)  $m/z$   $[\text{M} + \text{H}]^+$  Calcd for  $\text{C}_{16}\text{H}_{17}\text{O}_3^+$  257.1172; Found 257.1163.

**methyl 4-(4-methoxyphenoxy)benzoate (C28)**<sup>S4</sup>

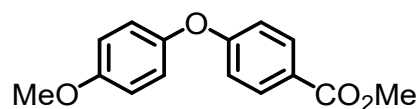

Purification by chromatography (PE/EA = 30:1) afforded **C28** as white solid, 110.9 mg, 86% yield. M.p. 55.0–55.6 °C.

<sup>1</sup>H NMR (400 MHz, CDCl<sub>3</sub>, ppm) δ 8.02–7.93 (m, 2H), 7.06–6.97 (m, 2H), 6.95–6.88 (m, 4H), 3.89 (s, 3H), 3.82 (s, 3H).

<sup>13</sup>C NMR (101 MHz, CDCl<sub>3</sub>, ppm) δ 166.7, 162.8, 156.6, 148.6, 131.6, 123.9, 121.7, 116.3, 115.1, 55.7, 52.0.

HRMS (ESI<sup>+</sup>) *m/z* [M + H]<sup>+</sup> Calcd for C<sub>15</sub>H<sub>15</sub>O<sub>4</sub><sup>+</sup> 259.0965; Found 259.0973.

**ethyl 4-(4-methoxyphenoxy)benzoate (C29)**<sup>S1</sup>

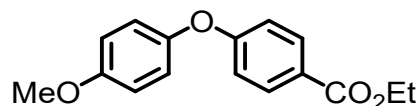

Purification by chromatography (PE/EA = 30:1) afforded **C29** as yellow oil, 114.3 mg, 84% yield.

<sup>1</sup>H NMR (400 MHz, CDCl<sub>3</sub>, ppm) δ 8.03–7.94 (m, 2H), 7.06–6.97 (m, 2H), 6.95–6.88 (m, 4H), 4.35 (q, *J* = 7.1 Hz, 2H), 3.82 (s, 3H), 1.38 (t, *J* = 7.1 Hz, 3H).

<sup>13</sup>C NMR (101 MHz, CDCl<sub>3</sub>, ppm) δ 166.2, 162.7, 156.6, 148.7, 131.6, 124.3, 121.6, 116.3, 115.1, 60.8, 55.7, 14.4.

HRMS (ESI<sup>+</sup>) *m/z* [M + Na]<sup>+</sup> Calcd for C<sub>16</sub>H<sub>16</sub>O<sub>4</sub>Na<sup>+</sup> 295.0941; Found 295.0936.

**(4-(4-methoxyphenoxy)phenyl)(phenyl)methanone (C30)**

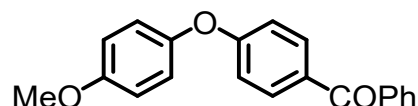

Purification by chromatography (PE/EA = 30:1) afforded **C30** as white solid, 127.7 mg, 84% yield. M.p. 95.0–96.0 °C.

<sup>1</sup>H NMR (400 MHz, CDCl<sub>3</sub>, ppm) δ 7.82–7.80 (m, 1H), 7.79–7.76 (m, 2H), 7.75 (m, 1H), 7.59–7.52 (m, 1H), 7.49–7.43 (m, 2H), 7.07–7.01 (m, 2H), 6.99–6.94 (m, 2H), 6.94–6.89 (m, 2H),

3.81 (s, 3H).

$^{13}\text{C}$  NMR (101 MHz,  $\text{CDCl}_3$ , ppm)  $\delta$  195.5, 162.6, 156.7, 148.6, 138.1, 132.5, 132.1, 131.4, 129.8, 128.3, 121.7, 116.2, 115.1, 55.7.

IR ( $\text{cm}^{-1}$ ): 3005, 2918, 1921, 1880, 1643, 1594, 1498, 1309, 1287, 1197, 1030, 963, 837, 727, 692.

HRMS (ESI<sup>+</sup>)  $m/z$   $[\text{M} + \text{Na}]^+$  Calcd for  $\text{C}_{20}\text{H}_{16}\text{O}_3\text{Na}^+$  327.0992; Found 327.0984.

#### 4-(4-methoxyphenoxy)-1,1'-biphenyl (C31)<sup>S4</sup>

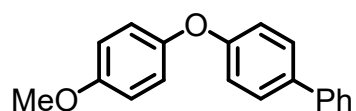

Purification by chromatography (PE/EA = 30:1) afforded **C31** as white solid, 82.8 mg, 60% yield. M.p. 119.3–120.3°C.

$^1\text{H}$  NMR (400 MHz,  $\text{CDCl}_3$ , ppm)  $\delta$  7.58–7.48 (m, 4H), 7.47–7.37 (m, 2H), 7.35–7.27 (m, 1H), 7.05–6.97 (m, 4H), 6.93–6.86 (m, 2H), 3.81 (s, 3H).

$^{13}\text{C}$  NMR (101 MHz,  $\text{CDCl}_3$ , ppm)  $\delta$  158.2, 156.0, 150.1, 140.7, 135.6, 128.8, 128.3, 126.9, 126.9, 121.0, 117.8, 114.9, 55.7.

HRMS (ESI<sup>+</sup>)  $m/z$   $[\text{M} + \text{H}]^+$  Calcd for  $\text{C}_{19}\text{H}_{17}\text{O}_2^+$  277.1223; Found 277.1216.

#### 1-methoxy-4-(4-(trifluoromethyl)phenoxy)benzene (C32)<sup>S17</sup>

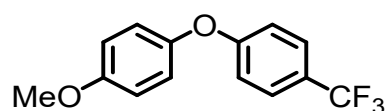

Purification by chromatography (PE/EA = 30:1) afforded **C32** as white solid, 83.1 mg, 62% yield. M.p. 98.0–99.3 °C.

$^1\text{H}$  NMR (400 MHz,  $\text{CDCl}_3$ , ppm)  $\delta$  7.53 (d,  $J$  = 8.7 Hz, 2H), 7.03–6.95 (m, 4H), 6.94–6.89 (m, 2H), 3.82 (s, 3H).

$^{13}\text{C}$  NMR (101 MHz,  $\text{CDCl}_3$ , ppm)  $\delta$  156.8, 151.9, 144.0, 122.3 (q,  $J$  = 3.7 Hz), 119.6 (q,  $J$  = 271.2 Hz), 119.5 (q,  $J$  = 32.7 Hz), 116.8, 112.1, 110.4, 50.9.

$^{19}\text{F}$  NMR (377 MHz,  $\text{CDCl}_3$ , ppm)  $\delta$  -66.4.

HRMS (ESI<sup>+</sup>)  $m/z$   $[\text{M} + \text{H}]^+$  Calcd for  $\text{C}_{14}\text{H}_{12}\text{F}_3\text{O}_2^+$  269.0784; Found 269.0788.

**1-chloro-4-(4-methoxyphenoxy)benzene (C33)<sup>S15</sup>**

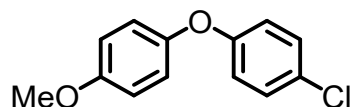

Purification by chromatography (PE/EA = 30:1) afforded **C33** as white solid, 58.5 mg, 51% yield. M.p. 53.4–54.6 °C.

<sup>1</sup>H NMR (400 MHz, CDCl<sub>3</sub>, ppm) δ 7.31–7.16 (m, 2H), 7.00–6.93 (m, 2H), 6.91–6.82 (m, 4H), 3.80 (s, 3H).

<sup>13</sup>C NMR (101 MHz, CDCl<sub>3</sub>, ppm) δ 157.2, 156.2, 149.8, 129.6, 127.4, 120.9, 118.8, 115.0, 55.7.

HRMS (ESI<sup>+</sup>) *m/z* [M + H]<sup>+</sup> Calcd for C<sub>13</sub>H<sub>12</sub>ClO<sub>2</sub><sup>+</sup> 235.0520, 237.0491; Found 235.0523, 237.0493.

**1-(tert-butyl)-4-(4-methoxyphenoxy)benzene (C34)<sup>S4</sup>**

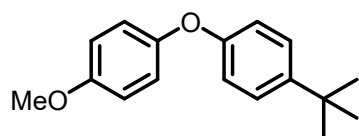

Purification by chromatography (PE/EA = 50:1) afforded **C34** as colorless oil. 47.9 mg, 42% yield.

<sup>1</sup>H NMR (400 MHz, CDCl<sub>3</sub>, ppm) δ 7.34–7.28 (m, 2H), 7.01–6.94 (m, 2H), 6.90–6.84 (m, 4H), 3.80 (s, 3H), 1.31 (s, 9H).

<sup>13</sup>C NMR (101 MHz, CDCl<sub>3</sub>, ppm) δ 156.1, 155.7, 150.5, 145.3, 126.4, 120.6, 117.1, 114.0, 55.7, 34.2, 31.5.

HRMS (ESI<sup>+</sup>) *m/z* [M + Na]<sup>+</sup> Calcd for C<sub>17</sub>H<sub>20</sub>O<sub>2</sub>Na<sup>+</sup> 279.1356; Found 279.1356.

**4,4'-oxybis(methoxybenzene) (C35)<sup>S15</sup>**

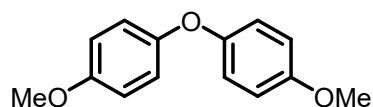

Purification by chromatography (PE/EA = 50:1) afforded **C35** as white solid. 41.2 mg, 41% yield. M.p. 53.1–53.9 °C.

$^1\text{H}$  NMR (400 MHz,  $\text{CDCl}_3$ , ppm)  $\delta$  6.99–6.88 (m, 4H), 6.88–6.80 (m, 4H), 3.78 (s, 6H).

$^{13}\text{C}$  NMR (101 MHz,  $\text{CDCl}_3$ , ppm)  $\delta$  155.4, 151.6, 119.6, 114.8, 55.7.

HRMS (ESI<sup>+</sup>)  $m/z$   $[\text{M} + \text{H}]^+$  Calcd for  $\text{C}_{14}\text{H}_{15}\text{O}_3^+$  231.1016; Found 231.1015

#### 4'-(4-methoxyphenoxy)-[1,1'-biphenyl]-4-carbonitrile (C36)

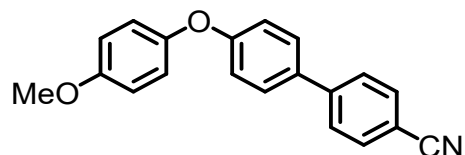

Purification by chromatography (PE/EA = 30:1) afforded **C36** as white solid, 132.4 mg, 88% yield. M.p. 112.8–114.9 °C.

$^1\text{H}$  NMR (400 MHz,  $\text{CDCl}_3$ , ppm)  $\delta$  7.73–7.68 (m, 2H), 7.66–7.62 (m, 2H), 7.55–7.49 (m, 2H), 7.05–7.00 (m, 4H), 6.95–6.89 (m, 2H), 3.83 (s, 3H).

$^{13}\text{C}$  NMR (101 MHz,  $\text{CDCl}_3$ , ppm)  $\delta$  159.4, 156.3, 149.4, 145.1, 133.1, 132.6, 128.5, 127.3, 121.2, 119.0, 117.8, 115.0, 110.4, 55.7.

IR ( $\text{cm}^{-1}$ ): 2918, 2849, 2222, 1926, 1878, 1733, 1600, 1485, 1464, 1393, 1218, 1102, 1030, 961, 821, 712, 650.

HRMS (ESI<sup>+</sup>)  $m/z$   $[\text{M} + \text{H}]^+$  Calcd for  $\text{C}_{20}\text{H}_{16}\text{NO}_2^+$  302.1176; Found 302.1177.

#### 4-(4-methoxyphenoxy)-2-(trifluoromethyl)benzonitrile (C37)

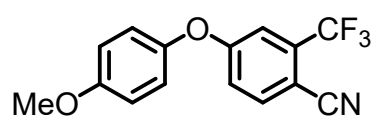

Purification by chromatography (PE/EA = 30:1) afforded **C37** as white solid, 134.8 mg, 92% yield. M.p. 63.1–64.1 °C.

$^1\text{H}$  NMR (400 MHz,  $\text{CDCl}_3$ , ppm)  $\delta$  7.72 (d,  $J$  = 8.6 Hz, 1H), 7.29 (d,  $J$  = 2.5 Hz, 1H), 7.09 (dd,  $J$  = 8.6, 2.5 Hz, 1H), 7.05–7.00 (m, 2H), 6.99–6.94 (m, 2H), 3.84 (s, 3H).

$^{13}\text{C}$  NMR (101 MHz,  $\text{CDCl}_3$ , ppm)  $\delta$  162.5, 157.5, 147.1, 136.7, 134.9 (q,  $J$  = 33.0 Hz), 122.1 (q,  $J$  = 274.1 Hz), 121.8, 119.1, 115.6, 115.5, 115.2 (q,  $J$  = 4.8 Hz), 102.5, 55.7.

$^{19}\text{F}$  NMR (377 MHz,  $\text{CDCl}_3$ , ppm)  $\delta$  -62.3.

IR ( $\text{cm}^{-1}$ ): 3008, 2917, 2226, 1945, 1893, 1647, 1599, 1412, 1329, 1268, 1226, 1173, 1122, 1037, 919, 884, 847, 767, 743, 704, 654.



HRMS (ESI<sup>+</sup>) *m/z* [M + H]<sup>+</sup> Calcd for C<sub>15</sub>H<sub>11</sub>F<sub>3</sub>NO<sub>2</sub><sup>+</sup> 294.0736; Found 294.0732.

**1-(4-methoxyphenoxy)-3,5-bis(trifluoromethyl)benzene (C38)<sup>S4</sup>**

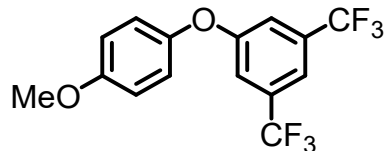

Purification by chromatography (PE/EA = 30:1) afforded **C38** as colorless oil, 68.9 mg, 41% yield.

<sup>1</sup>H NMR (400 MHz, CDCl<sub>3</sub>, ppm) δ 7.52 (s, 1H), 7.32 (s, 2H), 7.04–6.99 (m, 2H), 6.97–6.92 (m, 2H), 3.84 (s, 3H).

<sup>13</sup>C NMR (101 MHz, CDCl<sub>3</sub>, ppm) δ 159.8, 157.1, 148.0, 133.1 (q, *J* = 33.6 Hz), 123.0 (q, *J* = 272.9 Hz), 121.5, 116.9 (d, *J* = 3.3 Hz), 115.6 (q, *J* = 3.8 Hz), 115.4, 55.6.

<sup>19</sup>F NMR (377 MHz, CDCl<sub>3</sub>, ppm) δ -63.1.

HRMS (ESI<sup>+</sup>) *m/z* [M + H]<sup>+</sup> Calcd for C<sub>15</sub>H<sub>11</sub>F<sub>6</sub>O<sub>2</sub><sup>+</sup> 337.0658; Found 337.0660.

**2-(4-methoxyphenoxy)benzonitrile (C39)<sup>S16</sup>**

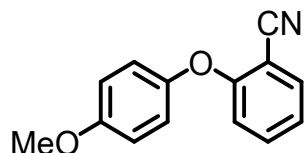

Purification by chromatography (PE/EA = 30:1) afforded **C39** as yellow oil, 45.0 mg, 40% yield.

<sup>1</sup>H NMR (400 MHz, CDCl<sub>3</sub>, ppm) δ 7.63 (dd, *J* = 7.7, 1.6 Hz, 1H), 7.43 (ddd, *J* = 8.9, 7.5, 1.7 Hz, 1H), 7.11–7.00 (m, 3H), 6.95–6.89 (m, 2H), 6.77 (d, *J* = 8.5 Hz, 1H), 3.82 (s, 3H).

<sup>13</sup>C NMR (101 MHz, CDCl<sub>3</sub>, ppm) δ 160.8, 157.09, 148.1, 134.2, 133.8, 122.2, 121.7, 116.2, 115.8, 115.1, 102.9, 55.7.

HRMS (ESI<sup>+</sup>) *m/z* [M + H]<sup>+</sup> Calcd for C<sub>14</sub>H<sub>12</sub>NO<sub>2</sub><sup>+</sup> 226.0863; Found 226.0861.

**2,4-dichloro-1-(4-methoxyphenoxy)benzene (C40)**

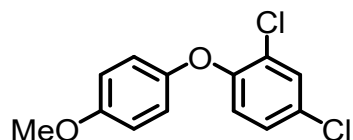

Purification by chromatography (PE/EA = 30:1) afforded **C40** as colorless oil, 60.3 mg, 45% yield.

$^1\text{H}$  NMR (400 MHz,  $\text{CDCl}_3$ , ppm)  $\delta$  7.42 (d,  $J = 2.5$  Hz, 1H), 7.10 (dd,  $J = 8.8, 2.5$  Hz, 1H), 6.95–6.90 (m, 2H), 6.89–6.84 (m, 2H), 6.76 (d,  $J = 8.8$  Hz, 1H), 3.78 (s, 3H).

$^{13}\text{C}$  NMR (101 MHz,  $\text{CDCl}_3$ , ppm)  $\delta$  155.2, 151.7, 148.5, 129.2, 127.0, 126.8, 124.3, 119.1, 118.4, 113.9, 54.6.

IR ( $\text{cm}^{-1}$ ): 3001, 2905, 1873, 1737, 1578, 1501, 1468, 1387, 1230, 1141, 1099, 1033, 871, 816, 758, 688.

HRMS (ESI<sup>+</sup>)  $m/z$   $[\text{M} + \text{H}]^+$  Calcd for  $\text{C}_{13}\text{H}_{11}\text{Cl}_2\text{O}_2^+$  269.0131, 271.0101; Found 269.0128, 271.0109.

#### methyl 4-methoxy-3-(4-methoxyphenoxy)benzoate (**C41**)

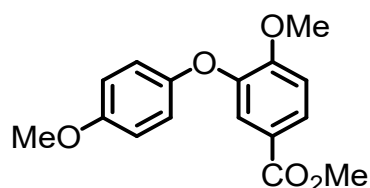

Purification by chromatography (PE/EA = 30:1) afforded **C41** as yellow oil, 86.4 mg, 60% yield.

$^1\text{H}$  NMR (400 MHz,  $\text{CDCl}_3$ , ppm)  $\delta$  7.79 (dd,  $J = 8.5, 2.0$  Hz, 1H), 7.50 (d,  $J = 2.0$  Hz, 1H), 7.01–6.92 (m, 3H), 6.89–6.83 (m, 2H), 3.91 (s, 3H), 3.82 (s, 3H), 3.78 (s, 3H).

$^{13}\text{C}$  NMR (101 MHz,  $\text{CDCl}_3$ , ppm)  $\delta$  166.4, 155.7, 154.5, 150.3, 146.5, 125.9, 122.9, 119.7, 119.6, 114.8, 111.5, 56.1, 55.6, 51.9.

IR ( $\text{cm}^{-1}$ ): 3001, 2951, 2906, 2838, 1713, 1604, 1501, 1460, 1435, 1271, 1211, 1128, 1024, 990, 828, 760, 629.

HRMS (ESI<sup>+</sup>)  $m/z$   $[\text{M} + \text{H}]^+$  Calcd for  $\text{C}_{16}\text{H}_{17}\text{O}_5^+$  289.1071; Found 289.1073.

#### 4-allyl-2-methoxy-1-(4-methoxyphenoxy)benzene (**C42**)

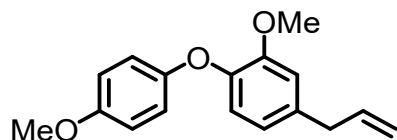

Purification by chromatography (PE/EA = 100:1) afforded **C42** as yellow oil, 55.4 mg, 41% yield.

$^1\text{H NMR}$  (400 MHz,  $\text{CDCl}_3$ , ppm)  $\delta$  6.97–6.92 (m, 1H), 6.91–6.89 (m, 1H), 6.85–6.84 (m, 1H), 6.82–6.81 (m, 2H), 6.79–6.77 (m, 1H), 6.69 (dd,  $J = 8.1, 1.9$  Hz, 1H), 6.03–5.93 (m, 1H), 5.16–5.04 (m, 2H), 3.85 (s, 3H), 3.78 (s, 3H), 3.37 (d,  $J = 6.7$  Hz, 2H).

$^{13}\text{C NMR}$  (101 MHz,  $\text{CDCl}_3$ , ppm)  $\delta$  155.3, 151.3, 150.7, 144.7, 137.4, 136.0, 120.8, 119.4, 119.0, 115.9, 114.6, 113.0, 56.0, 55.7, 40.0.

IR ( $\text{cm}^{-1}$ ): 3000, 2918, 2835, 1639, 1498, 1416, 1214, 1124, 1033, 952, 842, 795, 653.

HRMS (ESI $^+$ )  $m/z$   $[\text{M} + \text{H}]^+$  Calcd for  $\text{C}_{17}\text{H}_{19}\text{O}_3^+$  271.1329; Found 271.1328.

#### 2-(4-methoxyphenoxy)-1,3,5-trimethylbenzene (C43)

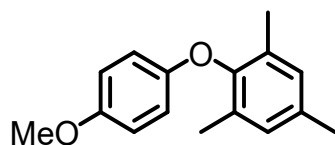

Purification by chromatography (PE/EA = 50:1) afforded **C43** as white solid, 50.8 mg, 42% yield. M.p. 78.2–79.3 °C.

$^1\text{H NMR}$  (400 MHz,  $\text{CDCl}_3$ , ppm)  $\delta$  6.88 (s, 2H), 6.80–6.73 (m, 2H), 6.71–6.63 (m, 2H), 3.74 (s, 3H), 2.29 (s, 3H), 2.08 (s, 6H).

$^{13}\text{C NMR}$  (101 MHz,  $\text{CDCl}_3$ , ppm)  $\delta$  154.0, 152.2, 149.3, 134.2, 131.1, 129.6, 115.2, 114.7, 55.7, 20.8, 16.3.

IR ( $\text{cm}^{-1}$ ): 2995, 2956, 2920, 2868, 2835, 1881, 1732, 1624, 1504, 1439, 1386, 1311, 1248, 1142, 1028, 917, 823, 765, 698.

HRMS (ESI $^+$ )  $m/z$   $[\text{M} + \text{H}]^+$  Calcd for  $\text{C}_{16}\text{H}_{19}\text{O}_2^+$  243.1380; Found 243.1379.

#### 3,5-di-tert-butyl-4'-methoxy-1-methyl-[1,1'-biphenyl]-4(1H)-one (C44')<sup>S18</sup>

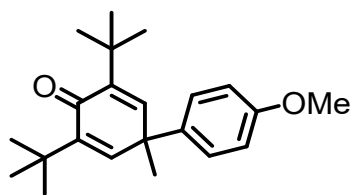

Purification by chromatography (PE/EA = 50:1) afforded **C44'** as yellow solid, 81.6 mg, 50% yield. M.p. 100.3–103.1 °C.

<sup>1</sup>H NMR (400 MHz, CDCl<sub>3</sub>, ppm) δ 7.19–7.13 (m, 2H), 6.89–6.83 (m, 2H), 6.55 (s, 2H), 3.79 (s, 3H), 1.59 (s, 3H), 1.23 (s, 18H).

<sup>13</sup>C NMR (101 MHz, CDCl<sub>3</sub>, ppm) δ 186.5, 158.5, 147.1, 144.3, 134.1, 127.3, 114.1, 55.3, 42.9, 34.6, 29.5, 25.0.

IR (cm<sup>-1</sup>): 2994, 2956, 2926, 2869, 1880, 1624, 1509, 1460, 1386, 1250, 1173, 1026, 918, 827, 741, 638.

HRMS (ESI<sup>+</sup>) *m/z* [M + Na]<sup>+</sup> Calcd for C<sub>22</sub>H<sub>30</sub>O<sub>2</sub>Na<sup>+</sup> 349.2138; Found 349.2138.

### 3-(4-methoxyphenoxy)quinoline (C45)

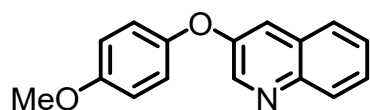

Purification by chromatography (PE/EA = 10:1) afforded **C45** as white solid, 50.2 mg, 40% yield. M.p. 98.3–100.0 °C.

<sup>1</sup>H NMR (400 MHz, CDCl<sub>3</sub>, ppm) δ 8.81 (d, *J* = 2.8 Hz, 1H), 8.08 (d, *J* = 8.4 Hz, 1H), 7.67–7.57 (m, 2H), 7.49 (m, 1H), 7.39 (d, *J* = 2.7 Hz, 1H), 7.11–7.04 (m, 2H), 7.00–6.91 (m, 2H), 3.84 (s, 3H).

<sup>13</sup>C NMR (101 MHz, CDCl<sub>3</sub>, ppm) δ 156.6, 152.4, 149.1, 144.8, 144.4, 129.2, 128.62, 127.5, 127.2, 126.9, 121.1, 118.3, 115.2, 55.7.

IR (cm<sup>-1</sup>): 3000, 2930, 1903, 1838, 1602, 1572, 1499, 1344, 1213, 1179, 1029, 955, 843, 751, 686.

HRMS (ESI<sup>+</sup>) *m/z* [M + H]<sup>+</sup> Calcd for C<sub>16</sub>H<sub>14</sub>NO<sub>2</sub><sup>+</sup> 252.1019; Found 252.1019.

### methyl (S)-2-((tert-butoxycarbonyl)amino)-3-(4-(4-methoxyphenoxy)phenyl)propanoate (C46)

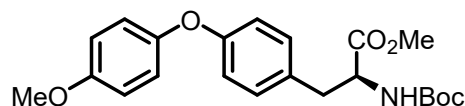

Purification by chromatography (PE/EA = 10:1) afforded **C46** as yellow oil, 100.3 mg, 50% yield.

$^1\text{H}$  NMR (400 MHz,  $\text{CDCl}_3$ , ppm)  $\delta$  7.04 (d,  $J$  = 8.5 Hz, 2H), 6.99–6.92 (m, 2H), 6.91–6.81 (m, 4H), 5.00 (d,  $J$  = 7.7 Hz, 1H), 4.56 (dd,  $J$  = 12.9, 5.7 Hz, 1H), 3.80 (s, 3H), 3.71 (s, 3H), 2.97–3.10 (m, 2H), 1.42 (s, 9H).

$^{13}\text{C}$  NMR (101 MHz,  $\text{CDCl}_3$ , ppm)  $\delta$  172.4, 157.6, 156.0, 155.1, 150.1, 130.5, 129.9, 120.9, 117.6, 114.9, 80.0, 55.7, 54.5, 52.2, 37.6, 28.3.

IR ( $\text{cm}^{-1}$ ): 3373, 2953, 2837, 1743, 1711, 1613, 1496, 1440, 1365, 1222, 1162, 1032, 925, 832, 779, 689.

HRMS (ESI<sup>+</sup>)  $m/z$   $[\text{M} + \text{Na}]^+$  Calcd for  $\text{C}_{22}\text{H}_{27}\text{NO}_6\text{Na}^+$  424.1731; Found 424.1732.

**(8R,9S,13S,14S)-3-(4-methoxyphenoxy)-13-methyl-6,7,8,9,11,12,13,14,15,16-decahydro-17H-cyclopenta[a]phenanthren-17-one (C47)**

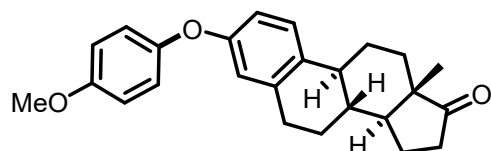

Purification by chromatography (PE/EA = 10:1) afforded **C47** as white solid, 78.9 mg, 42% yield. M.p. 134.4–135.2 °C.

$^1\text{H}$  NMR (400 MHz,  $\text{CDCl}_3$ , ppm)  $\delta$  7.20 (d,  $J$  = 8.5 Hz, 1H), 7.01–6.93 (m, 2H), 6.91–6.84 (m, 2H), 6.76–6.71 (m, 1H), 6.68 (d,  $J$  = 2.6 Hz, 1H), 3.80 (s, 3H), 2.93–2.79 (m, 2H), 2.50 (dd,  $J$  = 18.8, 8.6 Hz, 1H), 2.41–2.33 (m, 1H), 2.31–2.23 (m, 1H), 2.20–2.11 (m, 1H), 2.10–1.93 (m, 3H), 1.68–1.36 (m, 6H), 0.91 (s, 3H).

$^{13}\text{C}$  NMR (101 MHz,  $\text{CDCl}_3$ , ppm)  $\delta$  156.4, 155.8, 150.3, 138.1, 133.9, 126.5, 120.8, 120.7, 117.6, 115.1, 114.8, 55.7, 50.5, 48.0, 44.1, 38.3, 35.9, 31.6, 29.6, 26.5, 25.9, 21.6, 13.9.

IR ( $\text{cm}^{-1}$ ): 3358, 3014, 2954, 1730, 1631, 1580, 1499, 1439, 1372, 1282, 1193, 1149, 1029, 982, 824, 734, 664.

HRMS (ESI<sup>+</sup>)  $m/z$   $[\text{M} + \text{Na}]^+$  Calcd for  $\text{C}_{25}\text{H}_{28}\text{O}_3\text{Na}^+$  399.1931; Found 399.1928.

**methyl 4-methoxy-3-(4-(methoxycarbonyl)phenoxy)benzoate (Aristogin C)**<sup>S19</sup>

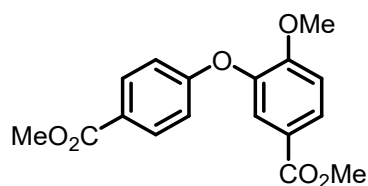

Purification by chromatography (PE/EA = 10:1) afforded **Aristogin C (C48)** as yellow solid.

91.6 mg, 58% yield. M.p. 92.9–93.6 °C.

<sup>1</sup>H NMR (400 MHz, CDCl<sub>3</sub>, ppm) δ 8.01–7.96 (m, 2H), 7.94 (dd, *J* = 8.6, 2.1 Hz, 1H), 7.75 (d, *J* = 2.1 Hz, 1H), 7.05 (d, *J* = 8.6 Hz, 1H), 6.95–6.86 (m, 2H), 3.89 (s, 3H), 3.88 (s, 3H), 3.86 (s, 3H).

<sup>13</sup>C NMR (101 MHz, CDCl<sub>3</sub>, ppm) δ 166.6, 166.1, 161.7, 155.6, 143.1, 131.6, 128.2, 124.4, 123.5, 123.4, 116.0, 112.1, 56.1, 52.1, 52.0.

HRMS (ESI<sup>+</sup>) *m/z* [M + Na]<sup>+</sup> Calcd for C<sub>17</sub>H<sub>16</sub>O<sub>6</sub>Na<sup>+</sup> 339.0839; Found 339.0840.

**4-([1,1'-biphenyl]-4-yloxy)benzonitrile (C49)**<sup>S20</sup>

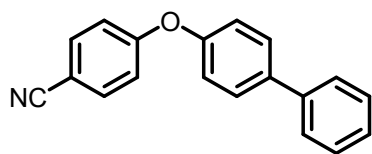

Purification by chromatography (PE/EA = 100:1) afforded **C49** as white solid, 121.9 mg, 90% yield. M.p. 98.9–99.6 °C.

<sup>1</sup>H NMR (400 MHz, CDCl<sub>3</sub>, ppm) δ 7.65–7.60 (m, 4H), 7.60–7.56 (m, 2H), 7.49–7.42 (m, 2H), 7.40–7.33 (m, 1H), 7.15–7.11 (m, 2H), 7.08–7.03 (m, 2H).

<sup>13</sup>C NMR (101 MHz, CDCl<sub>3</sub>, ppm) δ 161.6, 154.3, 140.1, 138.4, 134.2, 128.91, 127.5, 127.0, 120.7, 118.9, 118.0, 106.0.

HRMS (ESI<sup>+</sup>) *m/z* [M + H]<sup>+</sup> Calcd for C<sub>19</sub>H<sub>14</sub>NO<sup>+</sup> 272.1070; Found 272.1070.

**(E)-4-hydroxy-3-((4-methoxyphenyl)diazenyl)benzonitrile (D1)**

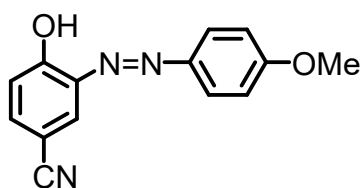

Purification by chromatography (PE/EA = 10:1) afforded **D1** as yellow solid. M.p. 130.1–131.4 °C.

<sup>1</sup>H NMR (400 MHz, CDCl<sub>3</sub>, ppm) δ 13.41 (s, 1H), 8.22 (d, *J* = 2.1 Hz, 1H), 7.91–7.84 (m, 2H), 7.56 (dd, *J* = 8.6, 2.1 Hz, 1H), 7.09–7.03 (m, 3H), 3.92 (s, 3H).

<sup>13</sup>C NMR (101 MHz, CDCl<sub>3</sub>, ppm) δ 163.2, 156.5, 144.1, 136.8, 136.5, 135.0, 124.7, 119.7, 118.6, 114.8, 103.4, 55.8.

IR (cm<sup>-1</sup>): 3184, 3058, 2915, 2849, 2560, 2220, 2168, 2042, 1902, 1825, 1737, 1604, 1503, 1466, 1438, 1330, 1253, 1159, 1114, 1024, 913, 817, 780, 665.

HRMS (ESI<sup>+</sup>) *m/z* [M + Na]<sup>+</sup> Calcd for C<sub>14</sub>H<sub>11</sub>N<sub>3</sub>O<sub>2</sub>Na<sup>+</sup> 276.0743; Found 276.0742.

## 6. References

- S1 S. Urgaonkar and J. G. Verkade, *Org. Lett.* 2005, **7**, 3319–3322.
- S2 C. A. Malapit, J. T. Reeves, C. A. Busacca, A. R. Howell and C. H. Senanayake, *Angew. Chem. Int. Ed.* 2016, **55**, 326–330.
- S3 R. Ray and J. F. Hartwig, *Angew. Chem. Int. Ed.* 2021, **60**, 8203–8211.
- S4 H. J. Kim, M. Kim and S. Chang, *Org. Lett.* 2011, **13**, 2368–2371.
- S5 S. Benyahya, F. Monnier, M. Taillefer, M. W. C. Man, C. Bied and F. Ouazzani, *Adv. Synth. Catal.* 2008, **350**, 2205–2208.
- S6 C. H. Burgos, T. E. Barder, X. Huang and S. L. Buchwald, *Angew. Chem. Int. Ed.* 2006, **45**, 4321–4326.
- S7 Q. Zhang, D. Wang, X. Wang and K. Ding, *J. Org. Chem.* 2009, **74**, 7187–7190.
- S8 D.-Y. Wang, Z.-K. Yang, C. Wang, A. Zhang and M. Uchiyama, *Angew. Chem. Int. Ed.* 2018, **57**, 3641–3645.
- S9 P. I. O’Daniel, Z. Peng, H. Pi, S. A. Testero, D. Ding, E. Spink, E. Leemans, M. A. Boudreau, T. Yamaguchi, V. A. Schroeder, W. R. Wolter, L. I. Llarrull, W. Song, E. Lastochkin, M. Kumarasiri, N. T. Antunes, M. Espahbodi, K. Lichtenwalter, M. A. Suckow, S. Vakulenko, S. Mobashery and M. Chang, *J. Am. Chem. Soc.* 2014, **136**, 3664–3672.
- S10 L. K. S. von Krbek, A. J. Achazi, S. Schoder, M. Gaedke, T. Biberger, B. Paulus and C. A. Schalley, *Chem. Eur. J.* 2017, **23**, 2877–2883.
- S11 L. Salvi, N. R. Davis, S. Z. Ali and S. L. Buchwald, *Org. Lett.* 2012, **14**, 170–173.
- S12 J. P. Hagen, G. Darner, S. Anderson, K. Higgins, D. A. Leas, A. Mitra, V. Mashinson, T. Wol, C. Vera-Esquivel, B. Belter, M. Cal, M. Kaiser, A. Wallick, R. C. Warner and P. H. Davis, *Bioorg. Chem.* 2020, **97**, 103590.
- S13 S. Yang, C. Wu, M. Ruan, Y. Yang, Y. Zhao, J. Niu, W. Yang and J. Xu, *Tetrahedron Lett.* 2012, **53**, 4288–4292.
- S14 J. Chen, X. Wang, X. Zheng, J. Ding, M. Liu and H. Wu, *Tetrahedron Lett.* 2012, **68**, 8905–8907.



- S15 D. Ma and Q. Cai, *Org. Lett.* 2003, **5**, 3799–3802.
- S16 M. Tobisu, J. Hasegawa, Y. Kita, H. Kinuta and N. Chatani, *Chem. Commun.* 2012, **48**, 11437–11439.
- S17 M. Ueno, C. Hori, K. Suzawa, M. Ebisawa and Y. Kondo, *Eur. J. Org. Chem.* 2005, **2005**, 1965–1968.
- S18 K. Guérard, C. Sabot, L. Racicot and S. Canesi, *J. Org. Chem.* 2009, **74**, 2039–2045.
- S19 N. Jung and S. Bräse, *Eur. J. Org. Chem.* 2009, 4494–4502.
- S20 E. Niknam, F. Panahi and A. Khalafi-Nezhad, *Eur. J. Org. Chem.* 2020, 2699–2707.

## 7. NMR spectra

**Fig. S7.** The  $^1\text{H}$  (400 MHz) and  $^{13}\text{C}$  (101 MHz) NMR spectra for 4-(4-methoxyphenoxy)benzonitrile (**C1**) in  $\text{CDCl}_3$ .

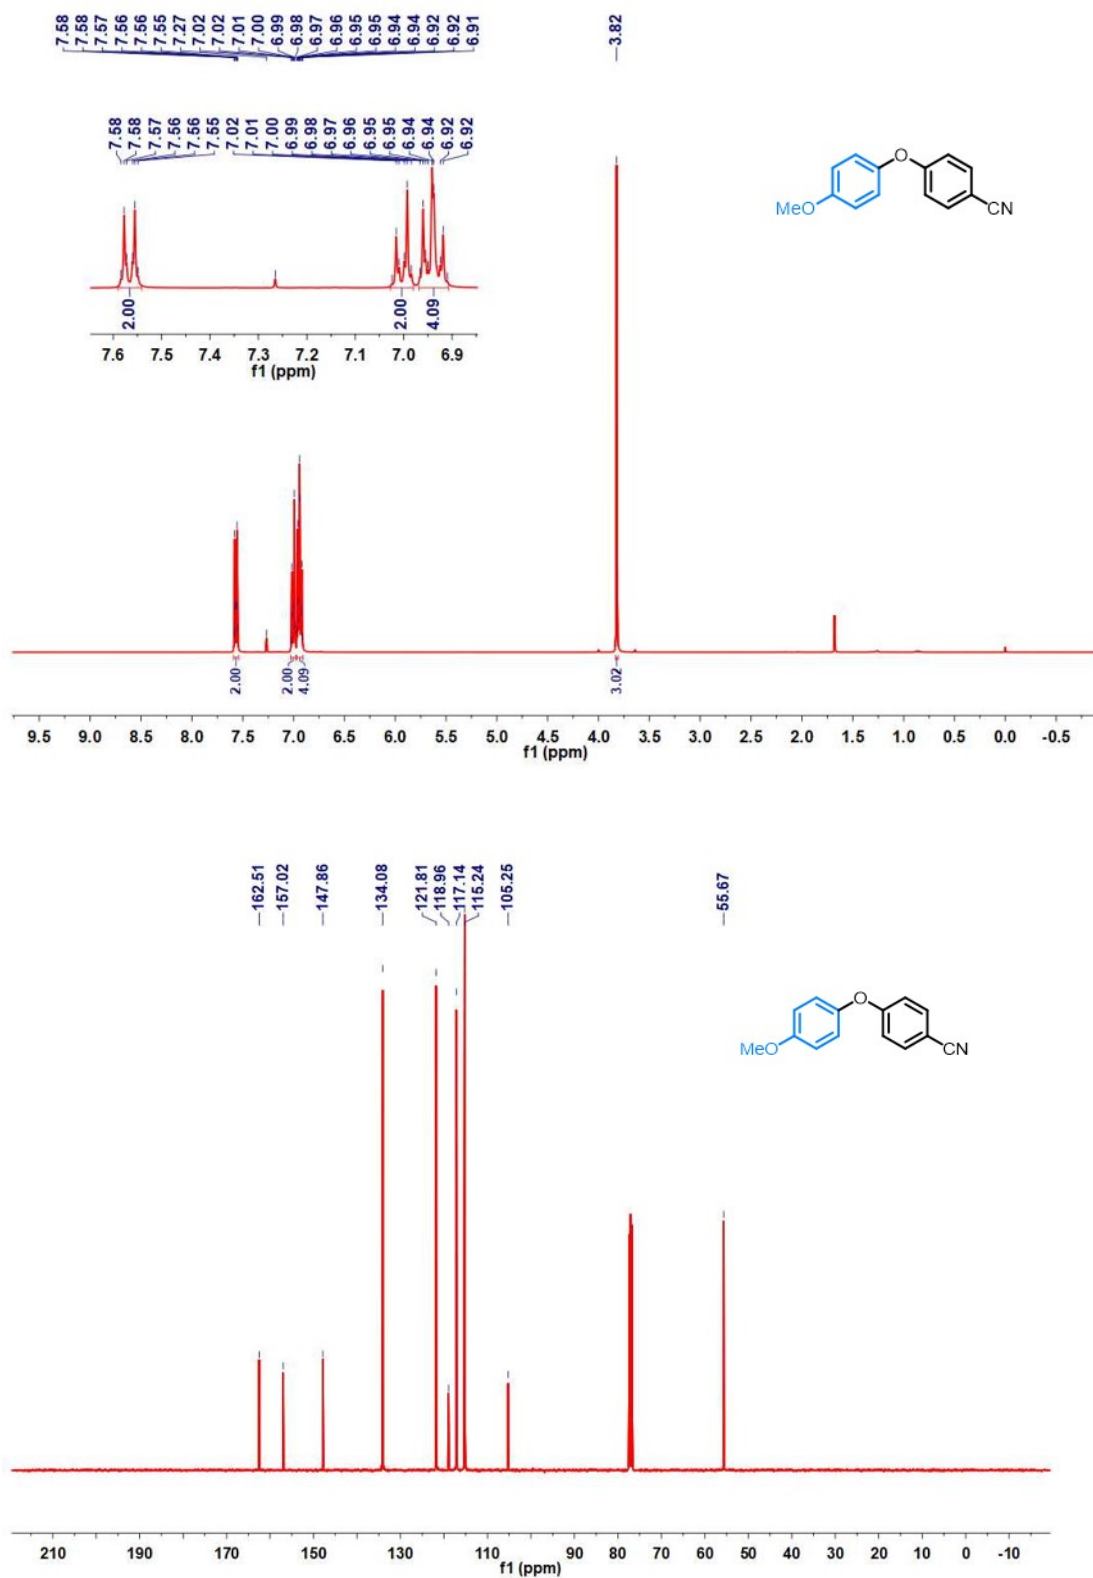

**Fig. S8.** The  $^1\text{H}$  (400 MHz) and  $^{13}\text{C}$  (101 MHz) NMR spectra for 4-phenoxybenzotrile (C2) in  $\text{CDCl}_3$ .

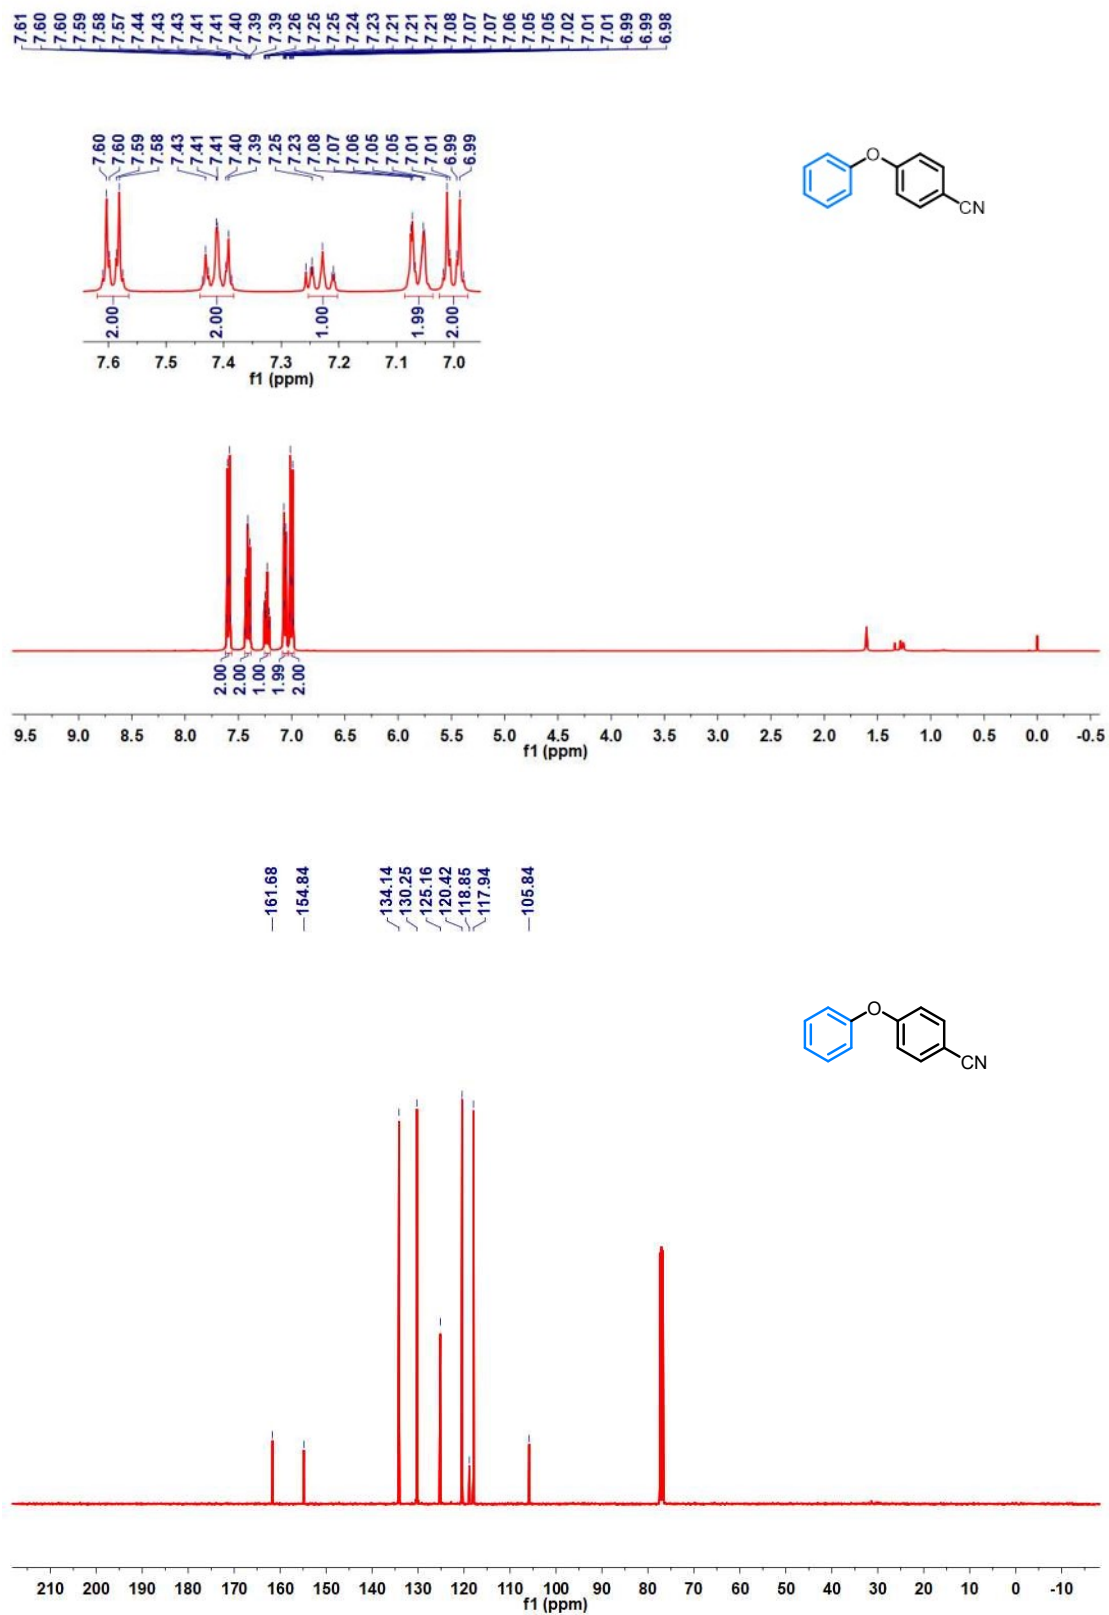

**Fig. S9.** The  $^1\text{H}$  (400 MHz) and  $^{13}\text{C}$  (101 MHz) NMR spectra for 4-(p-tolyloxy)benzonitrile (**C3**) in  $\text{CDCl}_3$ .

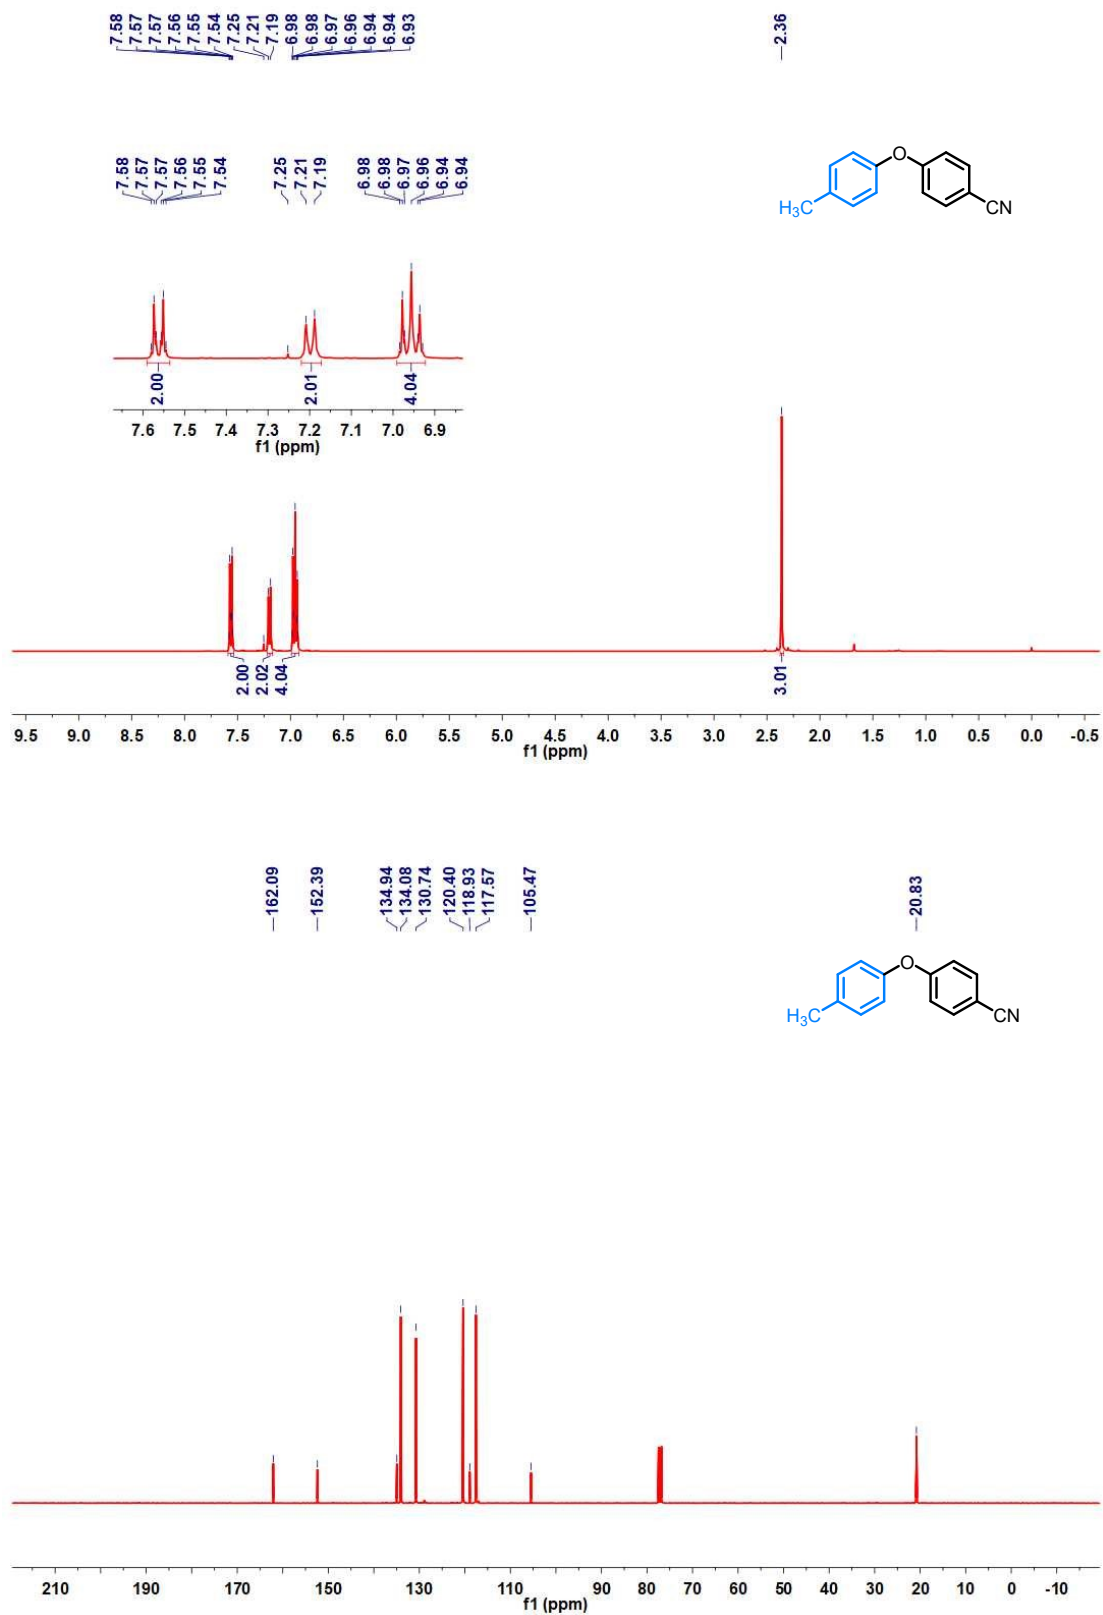

**Fig. S10.** The  $^1\text{H}$  (400 MHz) and  $^{13}\text{C}$  (101 MHz) NMR spectra for 4-(4-ethylphenoxy)benzotrile (**C4**) in  $\text{CDCl}_3$ .

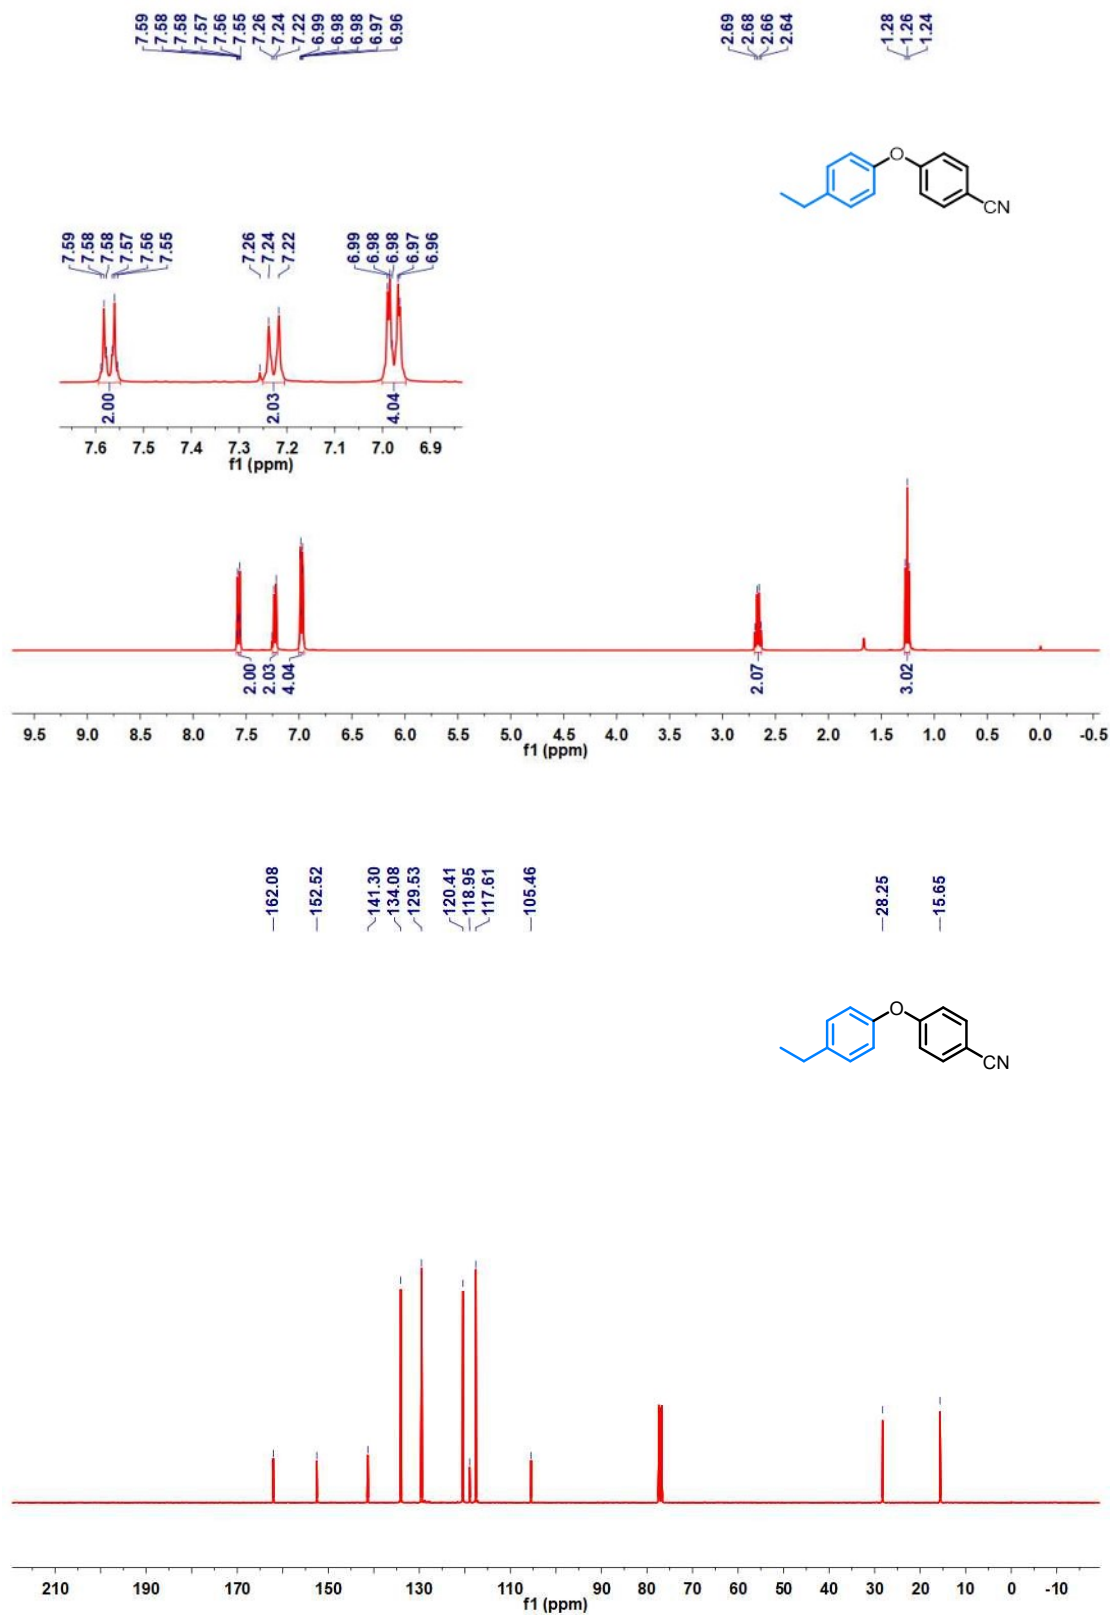

**Fig. S11.** The  $^1\text{H}$  (400 MHz) and  $^{13}\text{C}$  (101 MHz) NMR spectra for 4-(4-isopropylphenoxy)benzonitrile (**C5**) in  $\text{CDCl}_3$ .

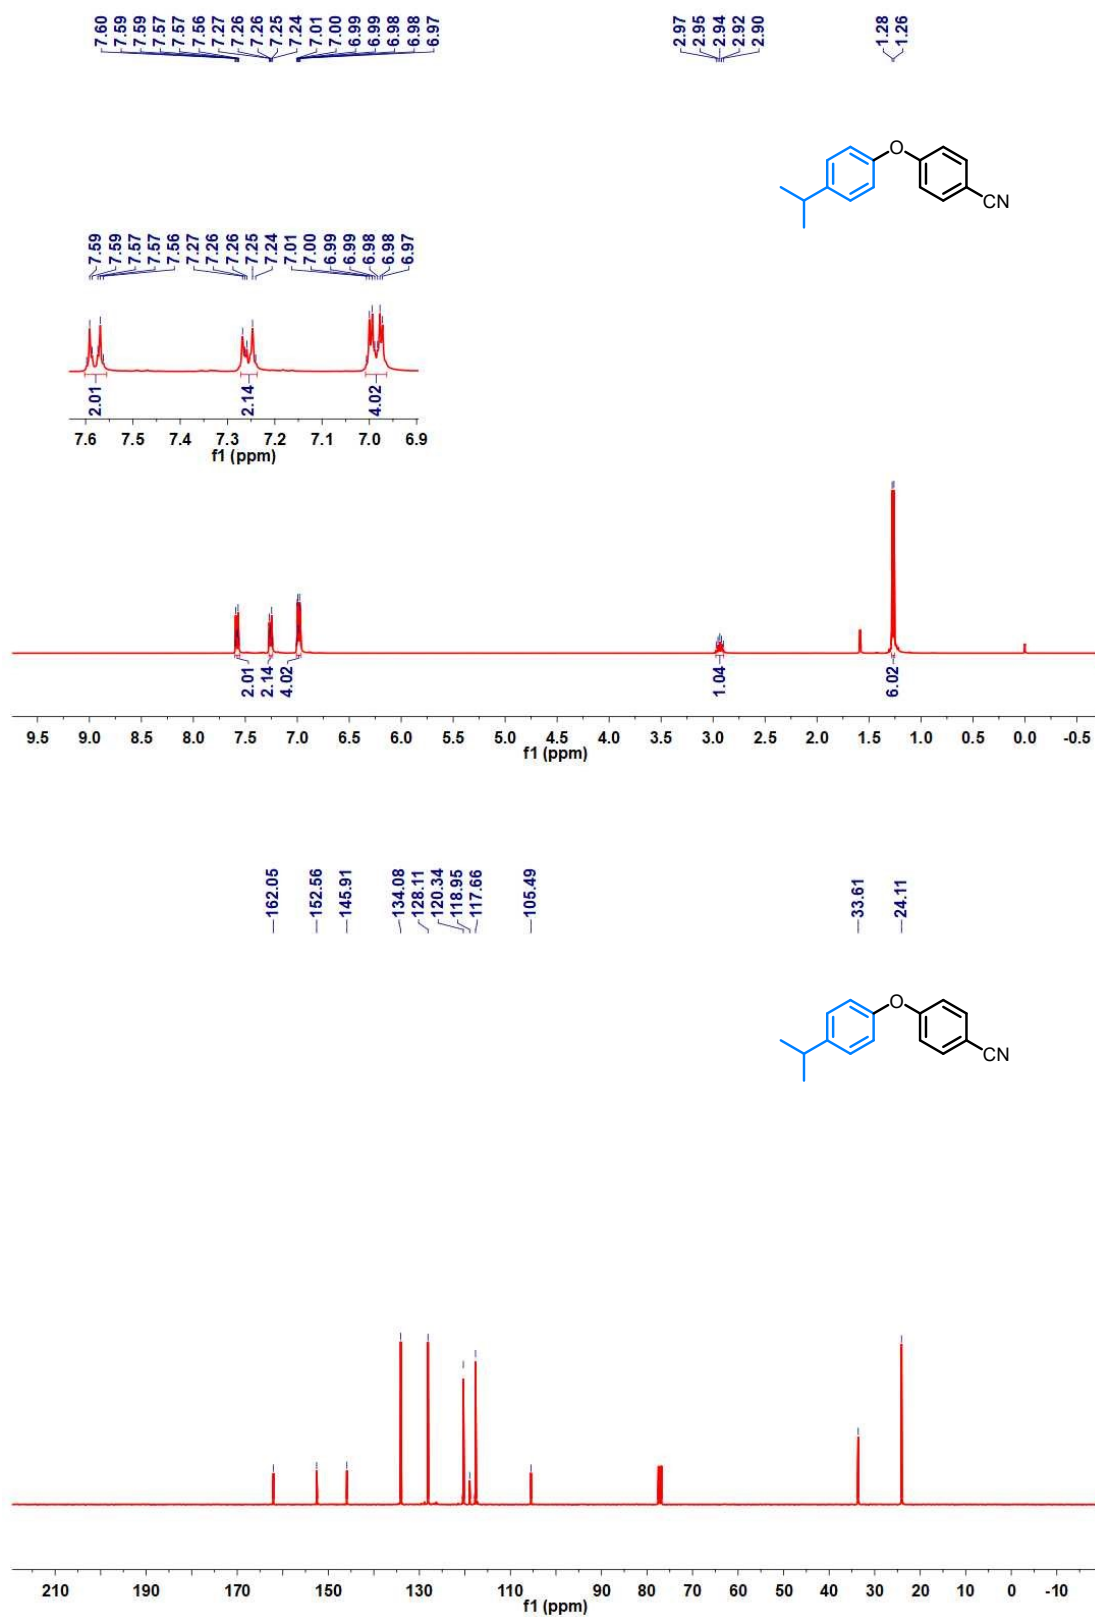

**Fig. S12.** The  $^1\text{H}$  (400 MHz) and  $^{13}\text{C}$  (101 MHz) NMR spectra for 4-(4-(tert-butyl)phenoxy)benzonitrile (**C6**) in  $\text{CDCl}_3$ .

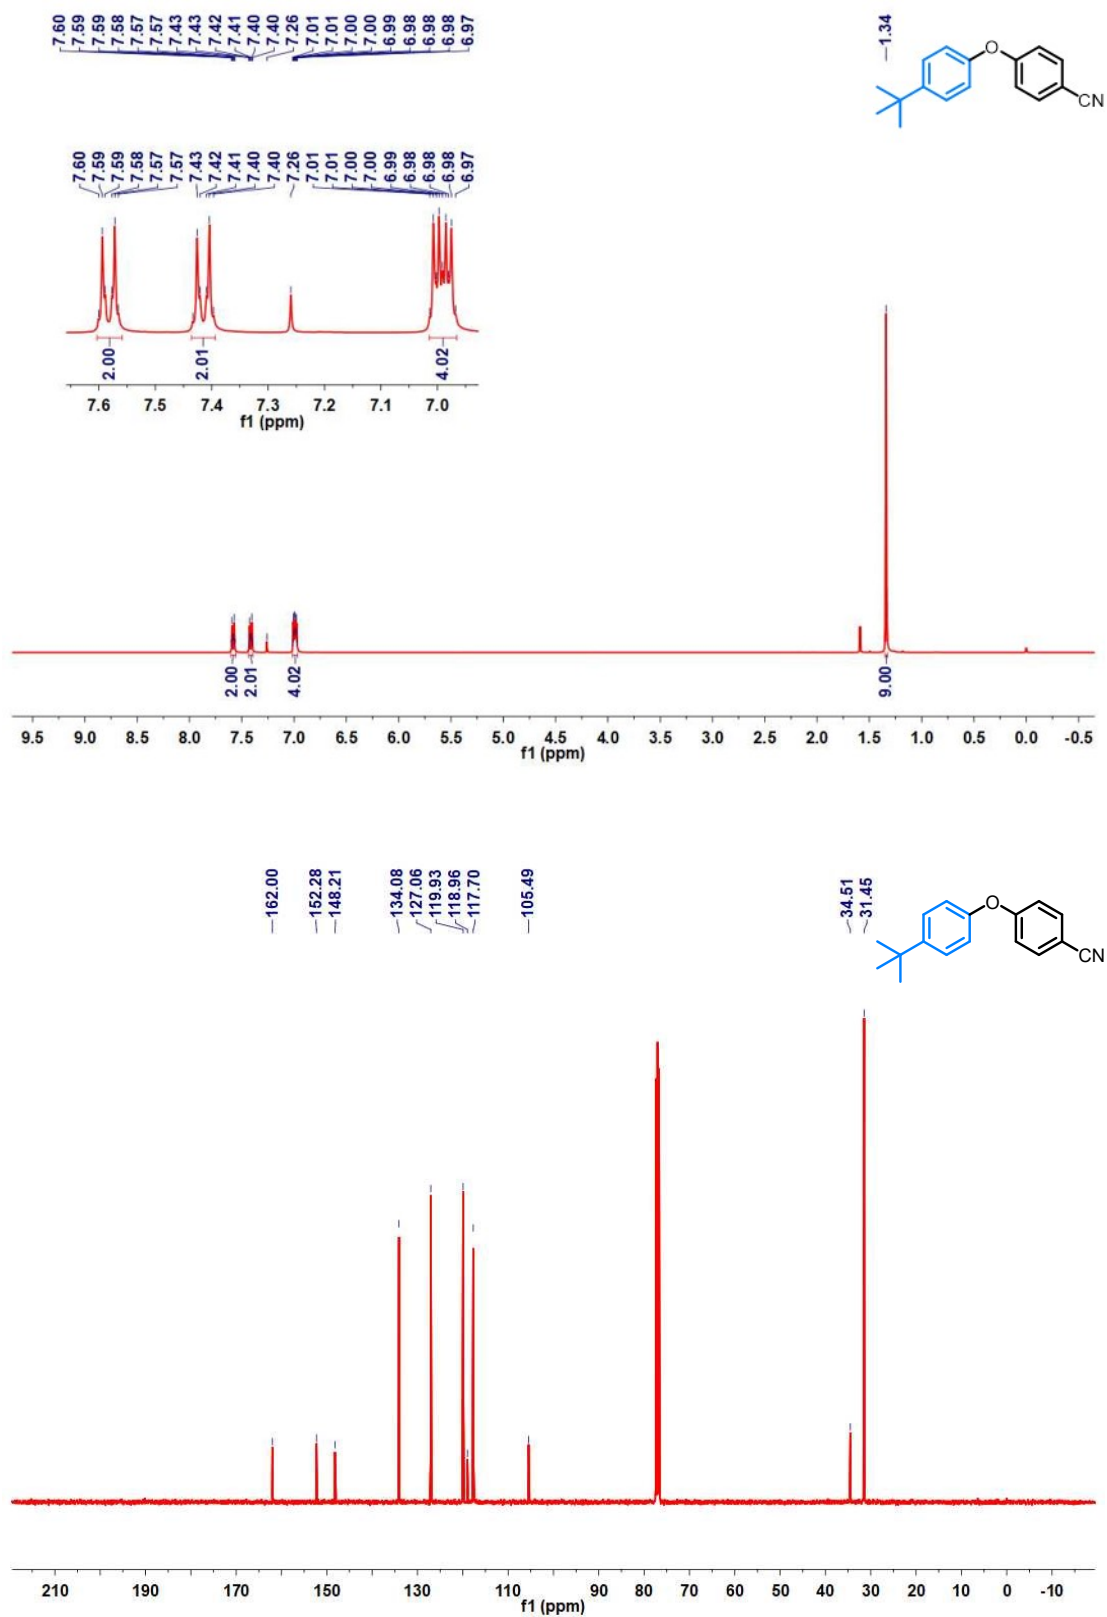

**Fig. S13.** The  $^1\text{H}$  (400 MHz) and  $^{13}\text{C}$  (101 MHz) NMR spectra for 4-(4-ethoxyphenoxy)benzotrile (**C7**) in  $\text{CDCl}_3$ .

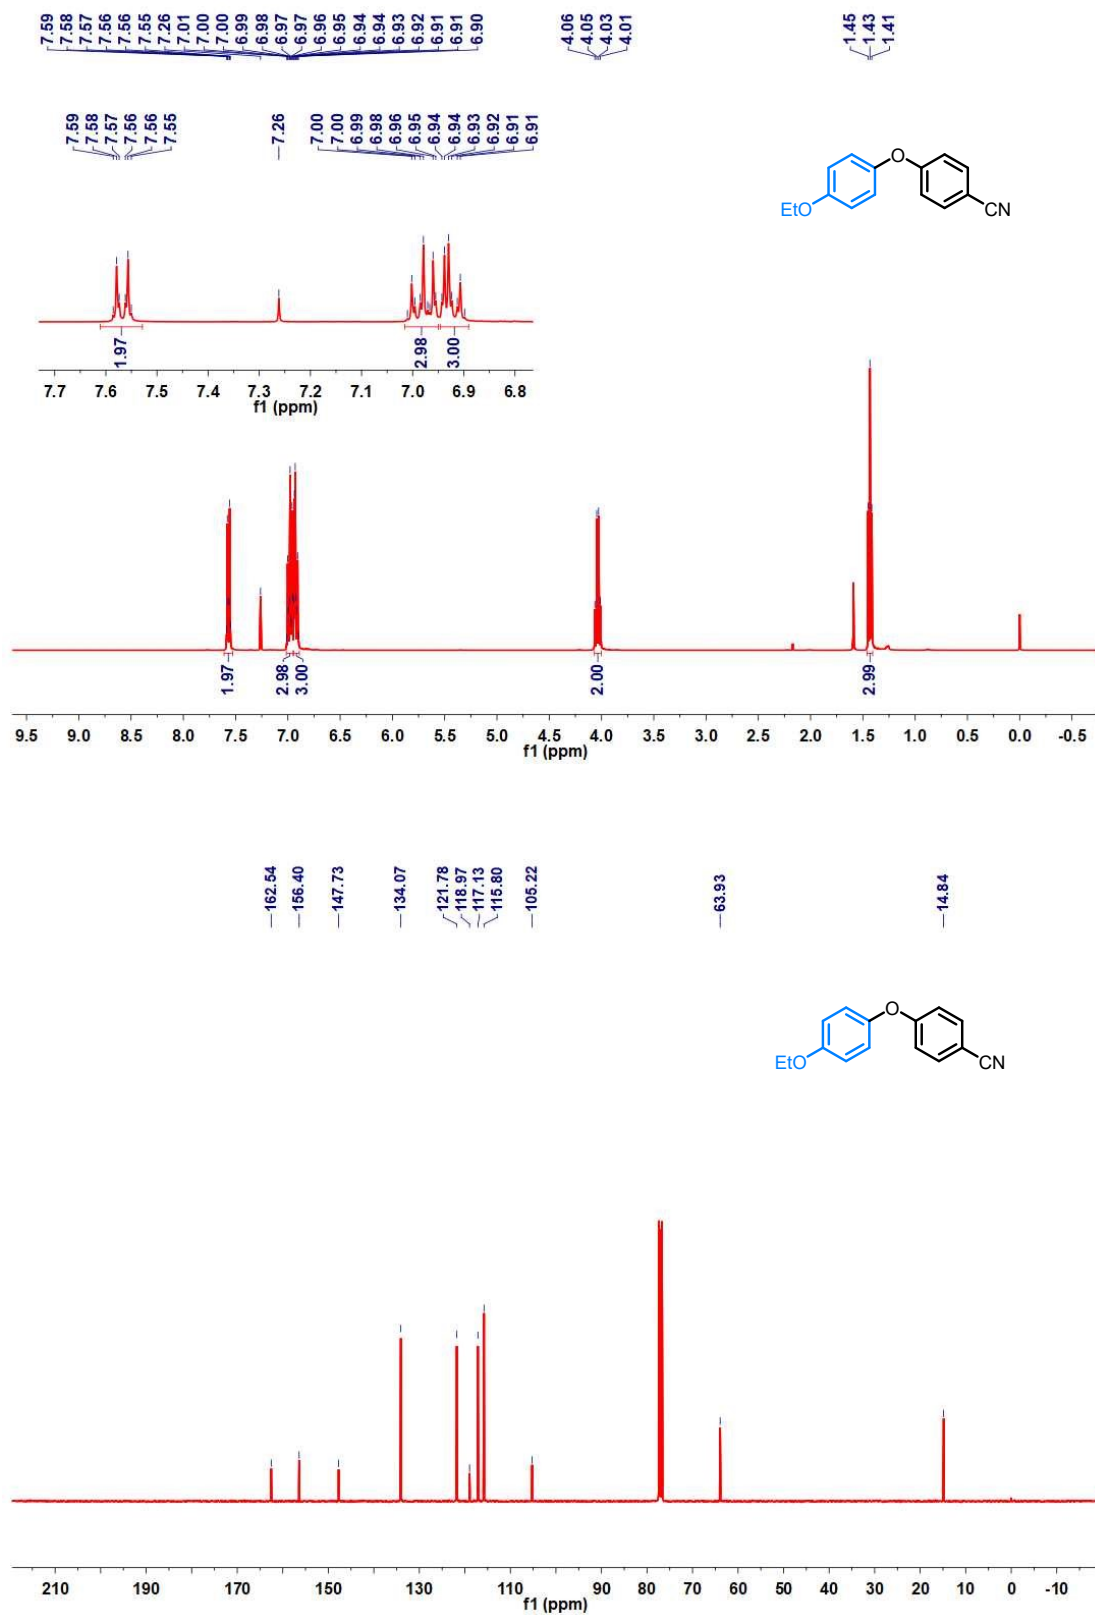



**Fig. S14.** The  $^1\text{H}$  (400 MHz) and  $^{13}\text{C}$  (101 MHz) NMR spectra for 4-(4-acetylphenoxy)benzonitrile (**C8**) in  $\text{CDCl}_3$ .

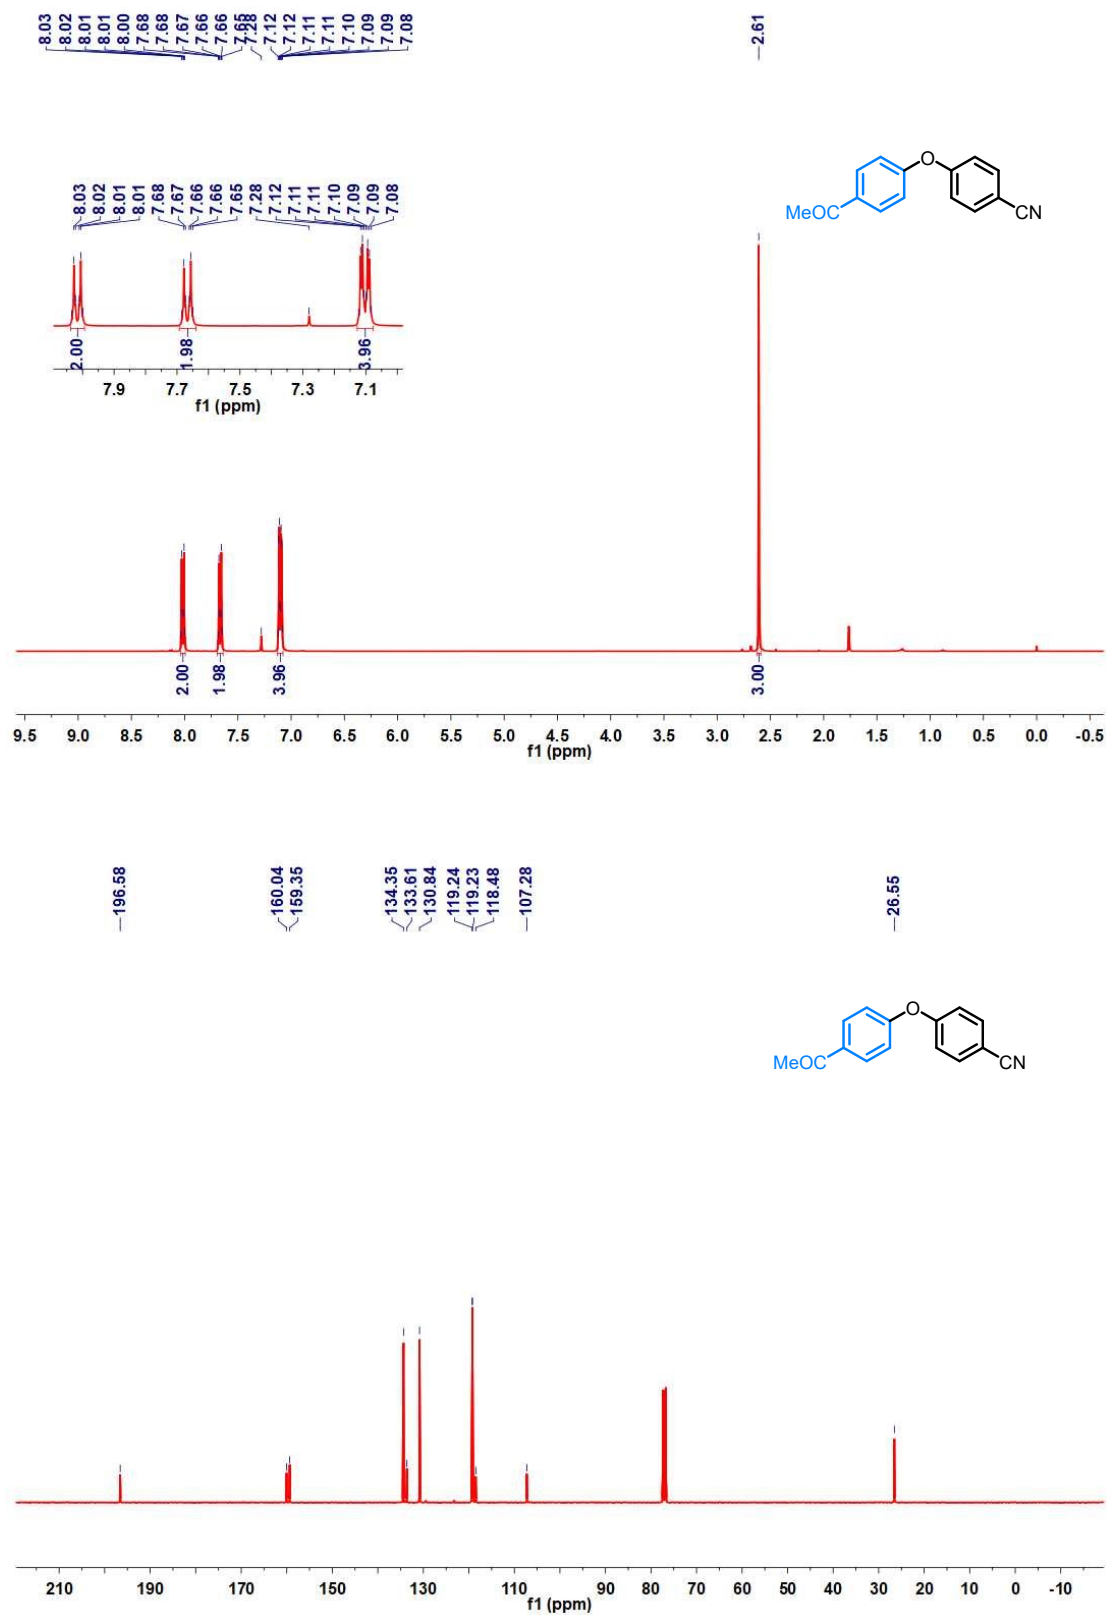

**Fig. S15.** The  $^1\text{H}$  (400 MHz),  $^{13}\text{C}$  (101 MHz) and  $^{19}\text{F}$  (377 MHz) NMR spectra for 4-(4-fluorophenoxy)benzonitrile (**C9**) in  $\text{CDCl}_3$ .

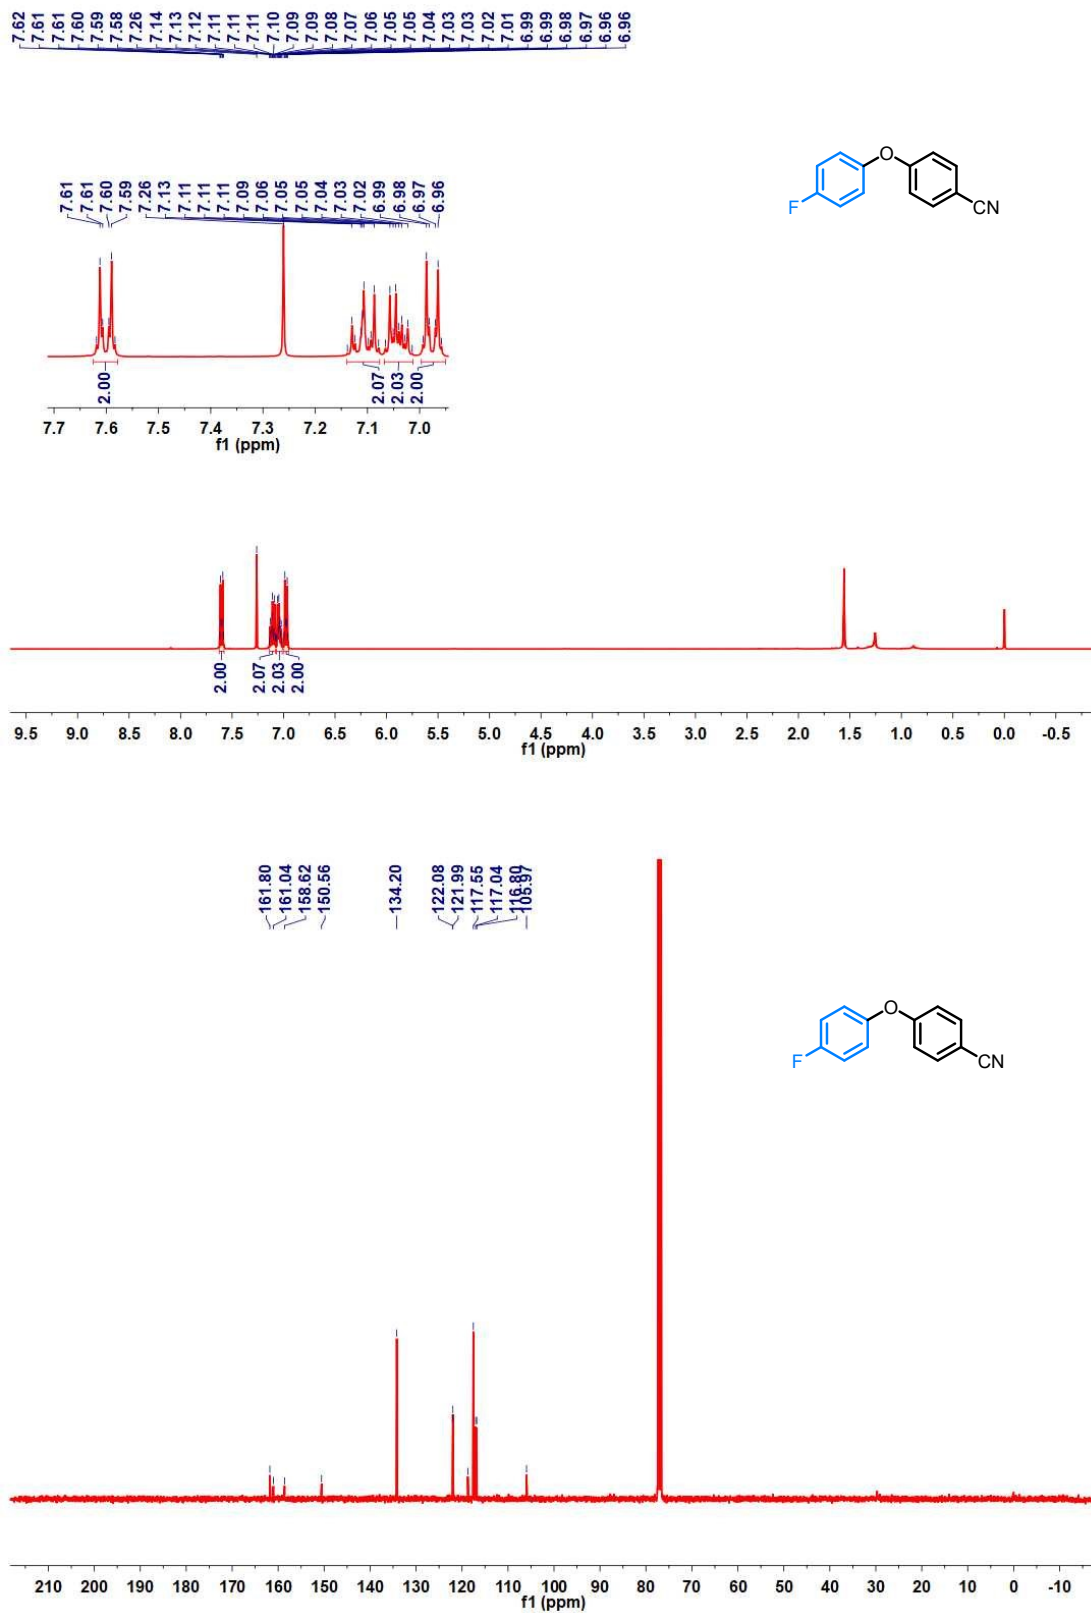

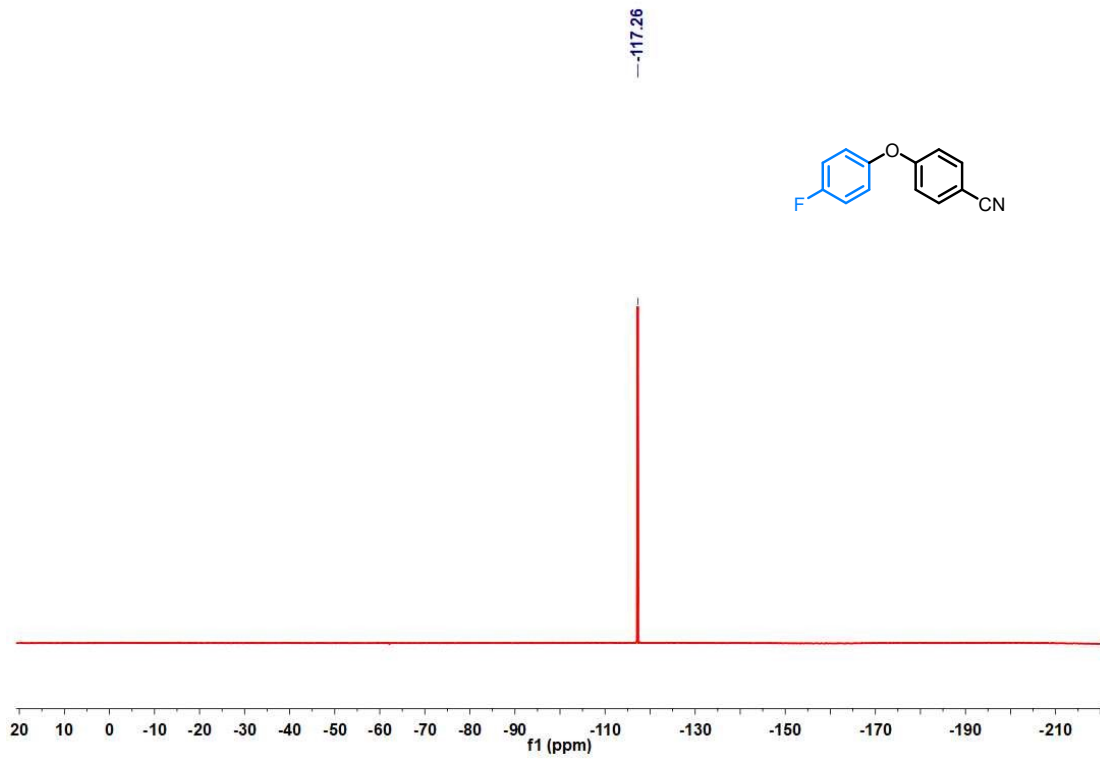

**Fig. S16.** The  $^1\text{H}$  (400 MHz) and  $^{13}\text{C}$  (101 MHz) NMR spectra for 4-(4-chlorophenoxy)benzonitrile (**C10**) in  $\text{CDCl}_3$ .

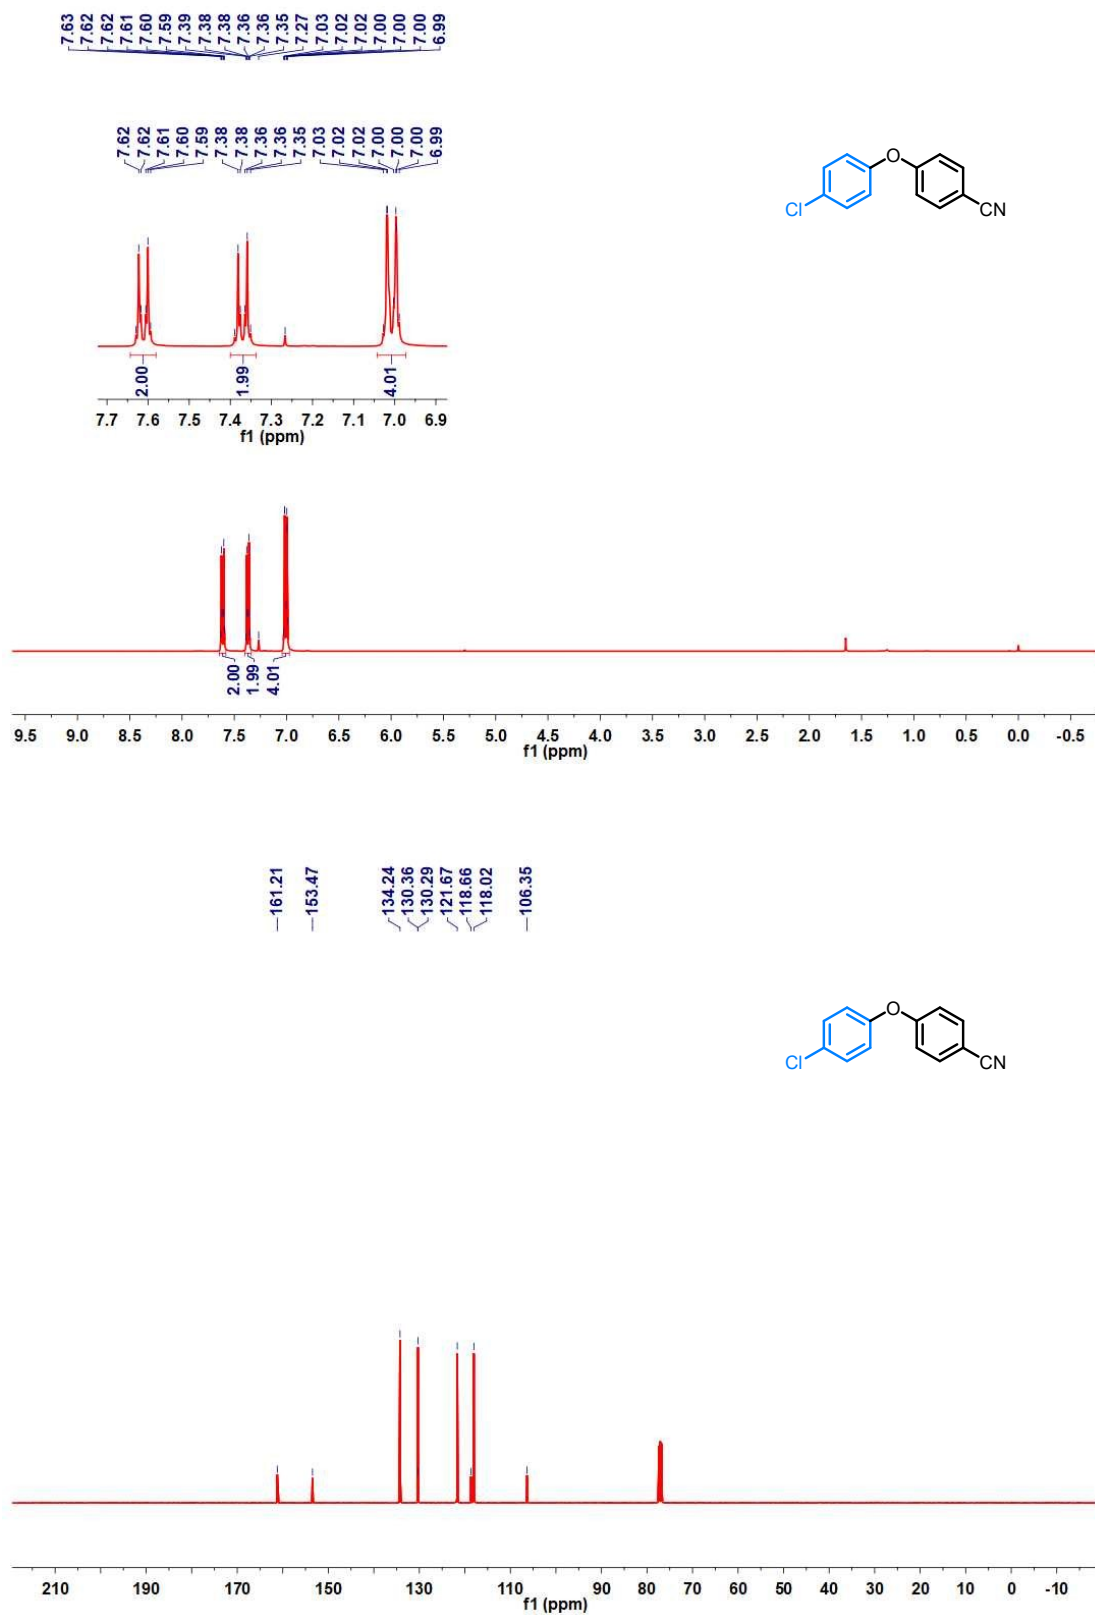

**Fig. S17.** The  $^1\text{H}$  (400 MHz) and  $^{13}\text{C}$  (101 MHz) spectra for 4-(4-bromophenoxy)benzonitrile (C11) in  $\text{CDCl}_3$ .

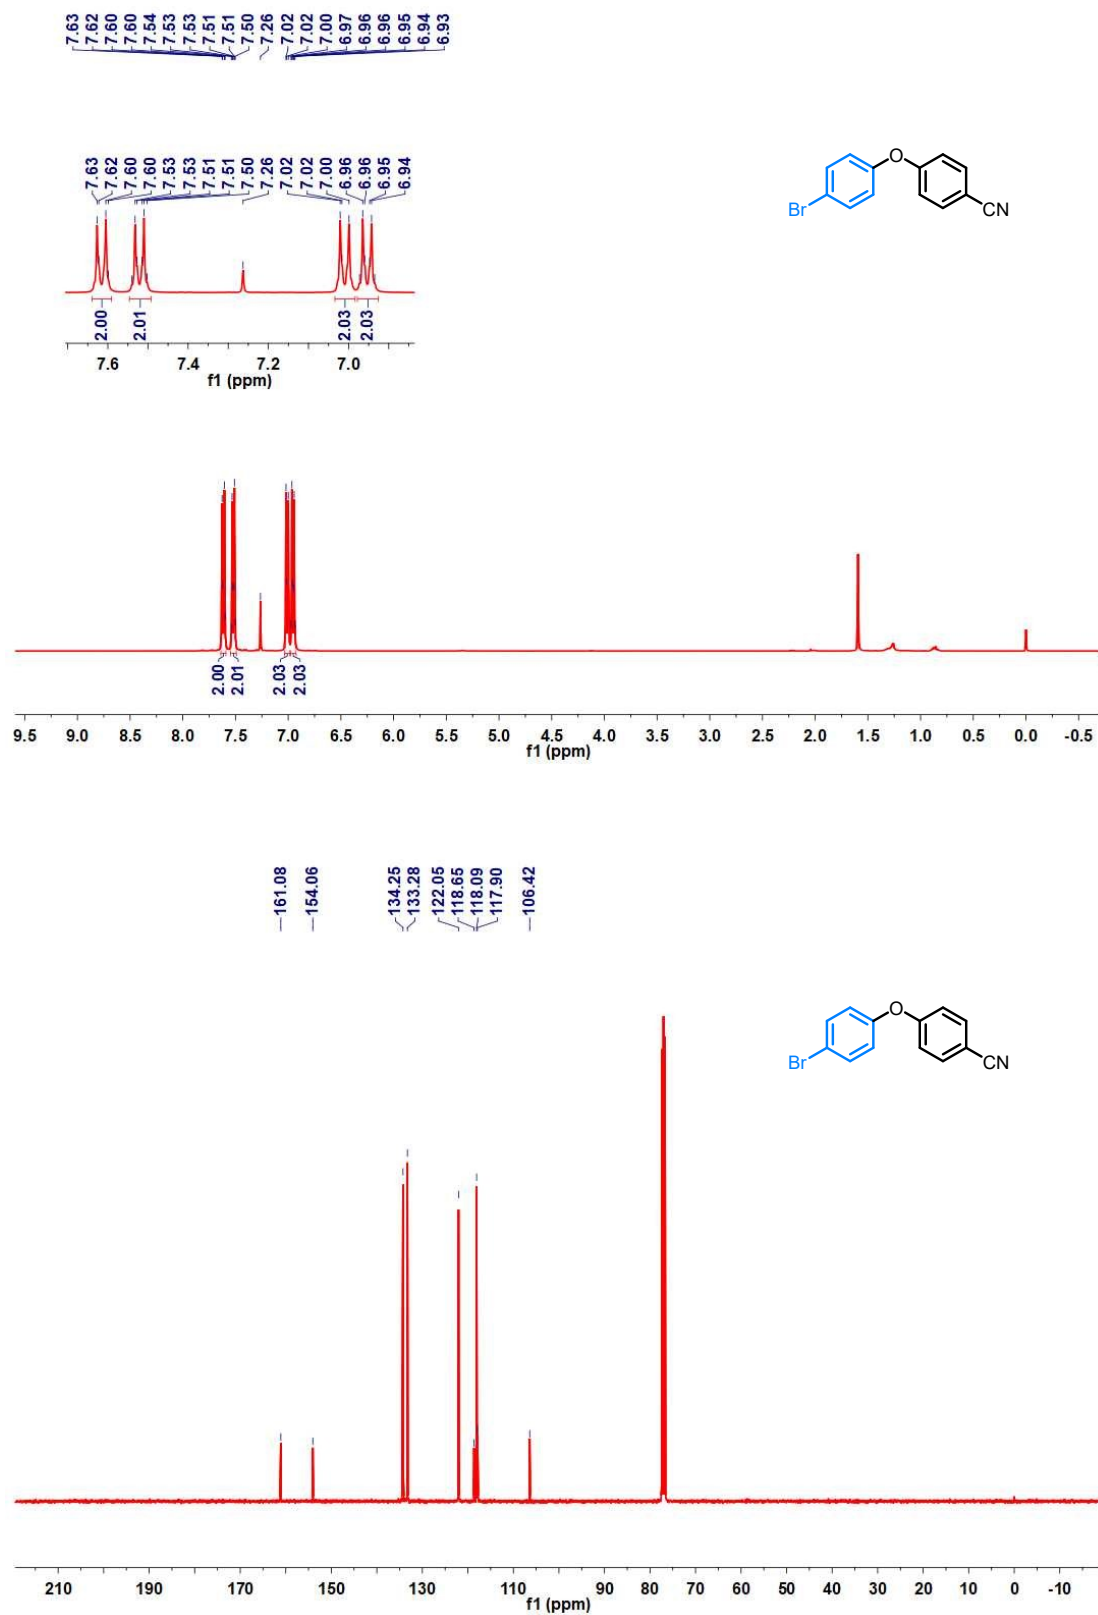

**Fig. S18.** The  $^1\text{H}$  (400 MHz),  $^{13}\text{C}$  (101 MHz) and  $^{19}\text{F}$  (377 MHz) NMR spectra for 4-(4-(trifluoromethyl)phenoxy)benzonitrile (**C12**) in  $\text{CDCl}_3$ .

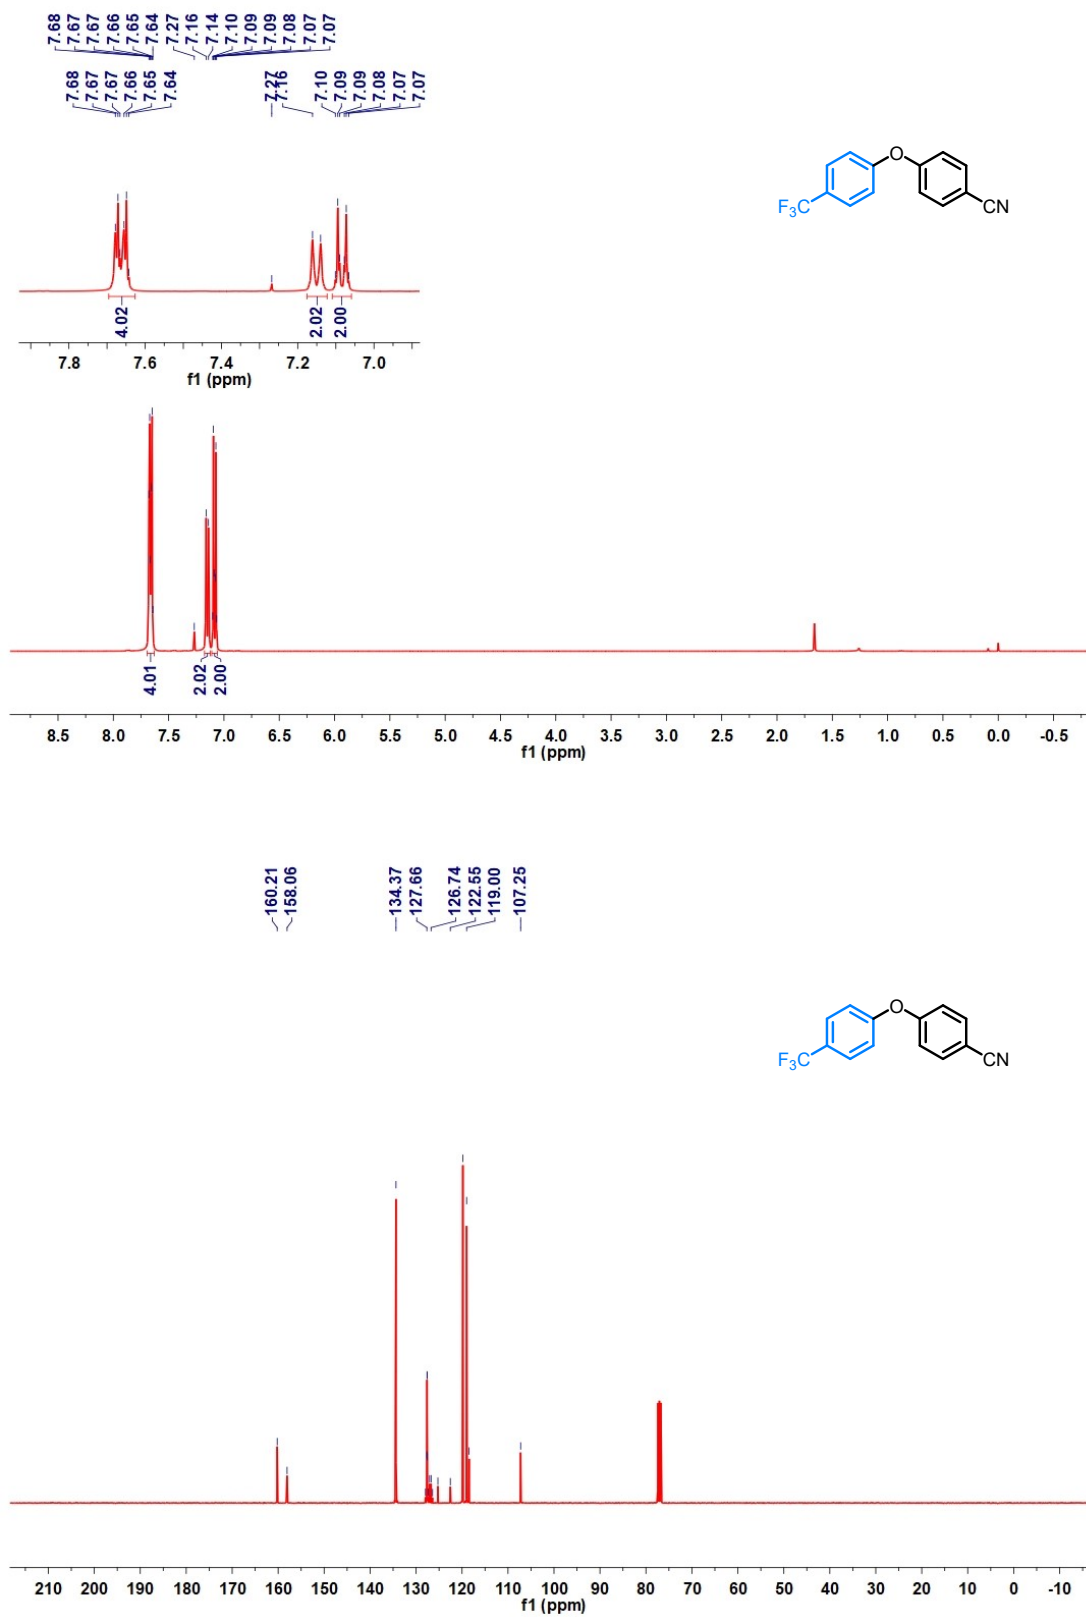

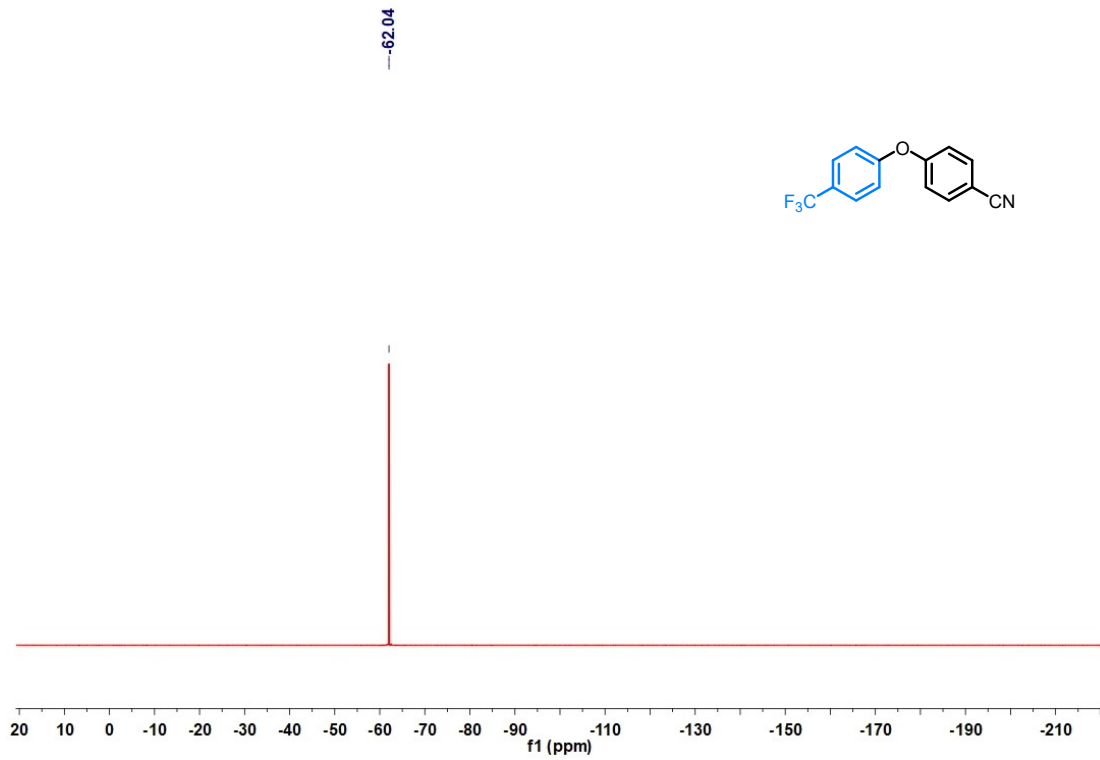

**Fig. S19.** The  $^1\text{H}$  (400 MHz) and  $^{13}\text{C}$  (101 MHz) spectra for 4,4'-oxydibenzonitrile (**C13**) in  $\text{CDCl}_3$ .

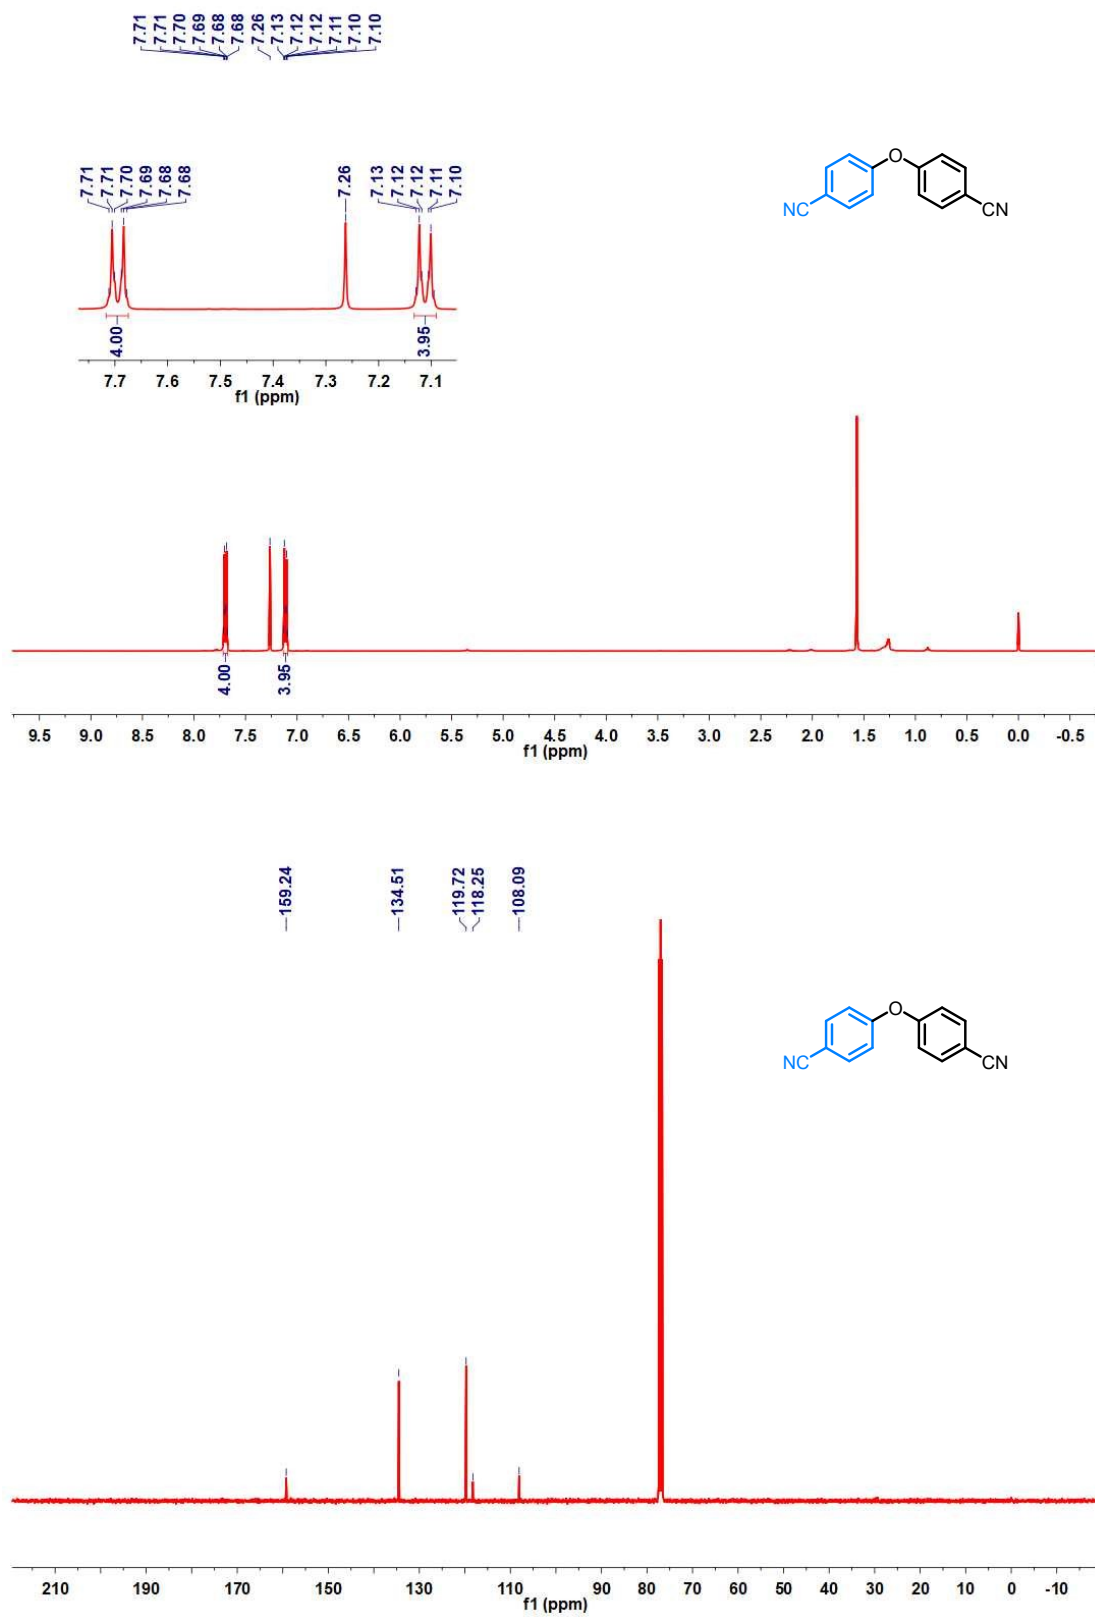



**Fig. S20.** The  $^1\text{H}$  (400 MHz) and  $^{13}\text{C}$  (101 MHz) NMR spectra for ethyl 4-(4-cyanophenoxy)benzoate (**C14**) in  $\text{CDCl}_3$ .

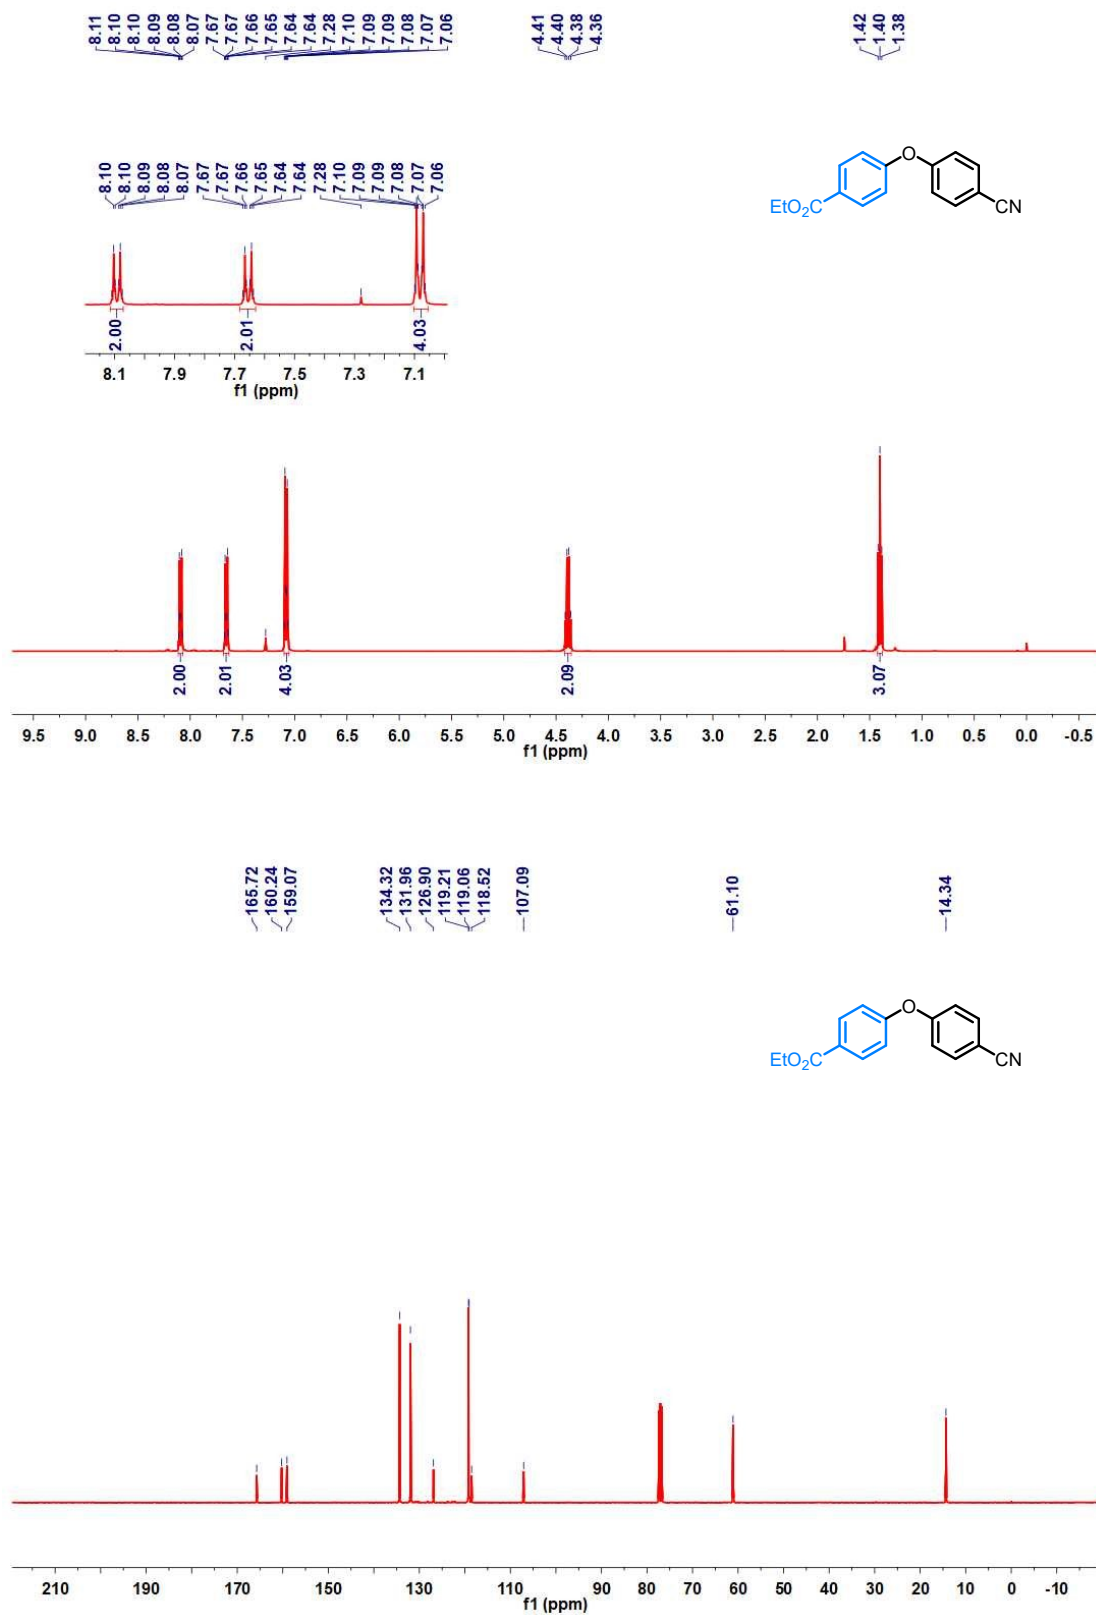

**Fig. S21.** The  $^1\text{H}$  (400 MHz) and  $^{13}\text{C}$  (101 MHz) spectra for methyl 4-(4-cyanophenoxy)benzoate (**C15**) in  $\text{CDCl}_3$ .

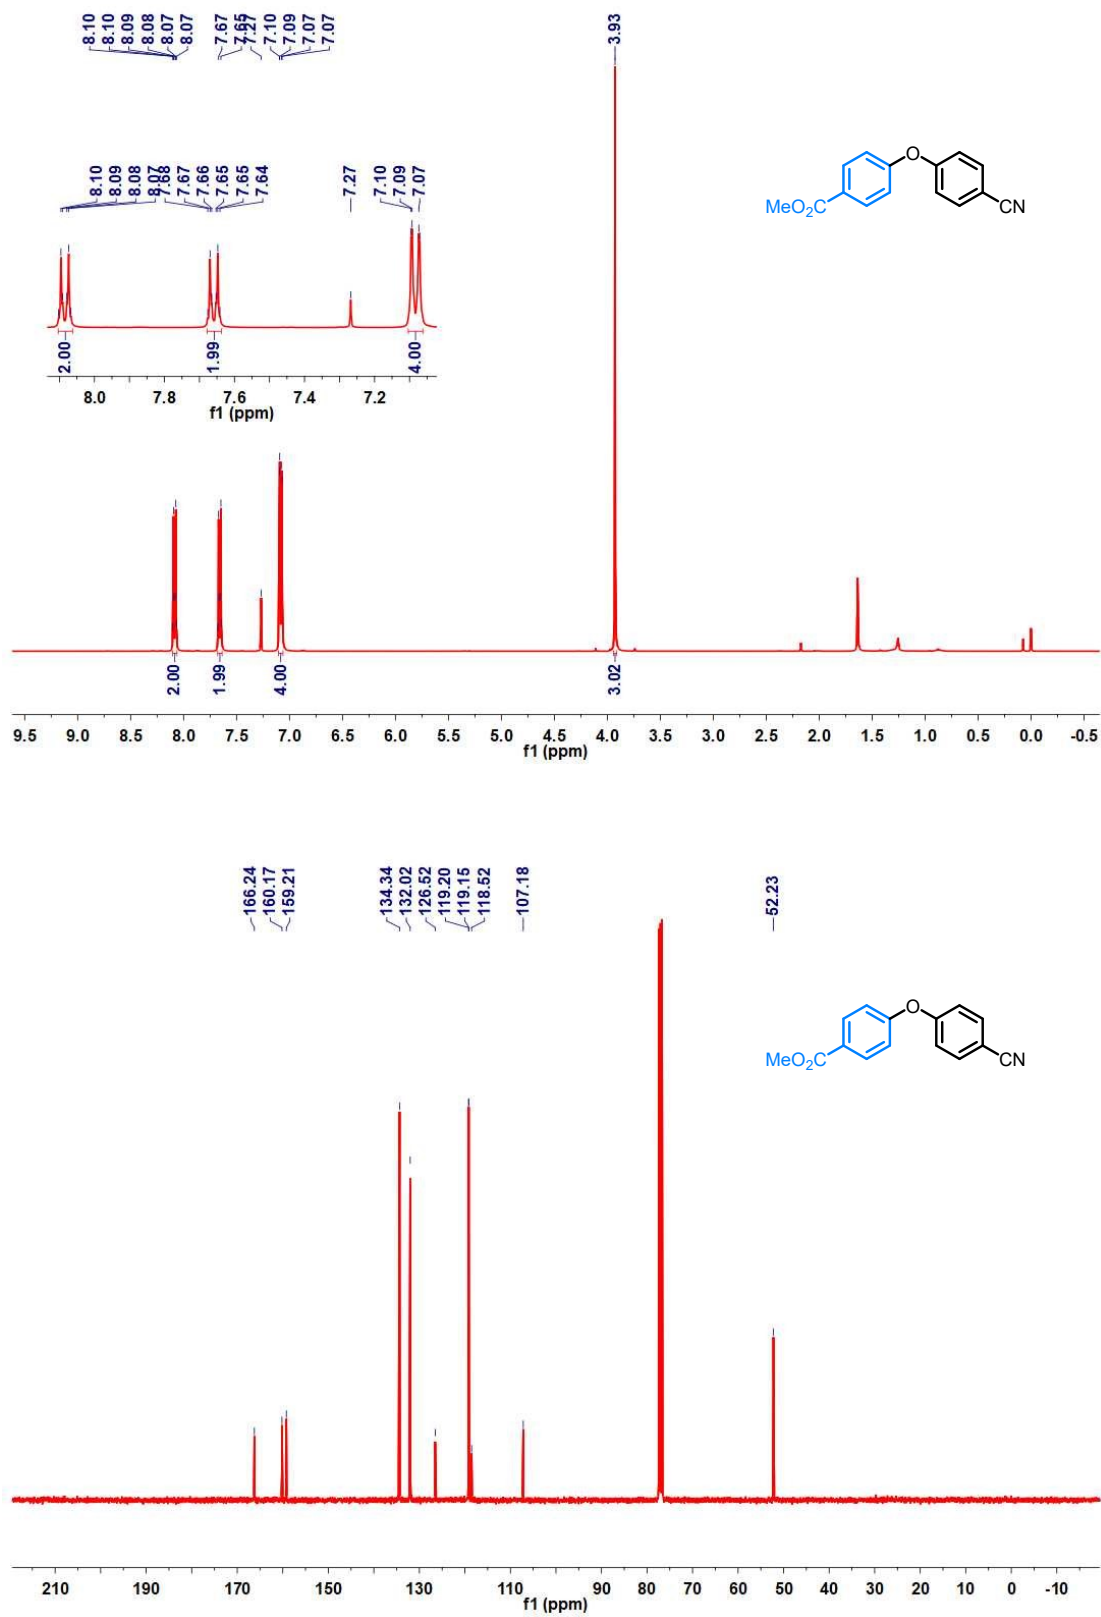

**Fig. S22.** The  $^1\text{H}$  (400 MHz) and  $^{13}\text{C}$  (101 MHz) NMR spectra for 4-(o-tolyloxy)benzonitrile (**C16**) in  $\text{CDCl}_3$ .

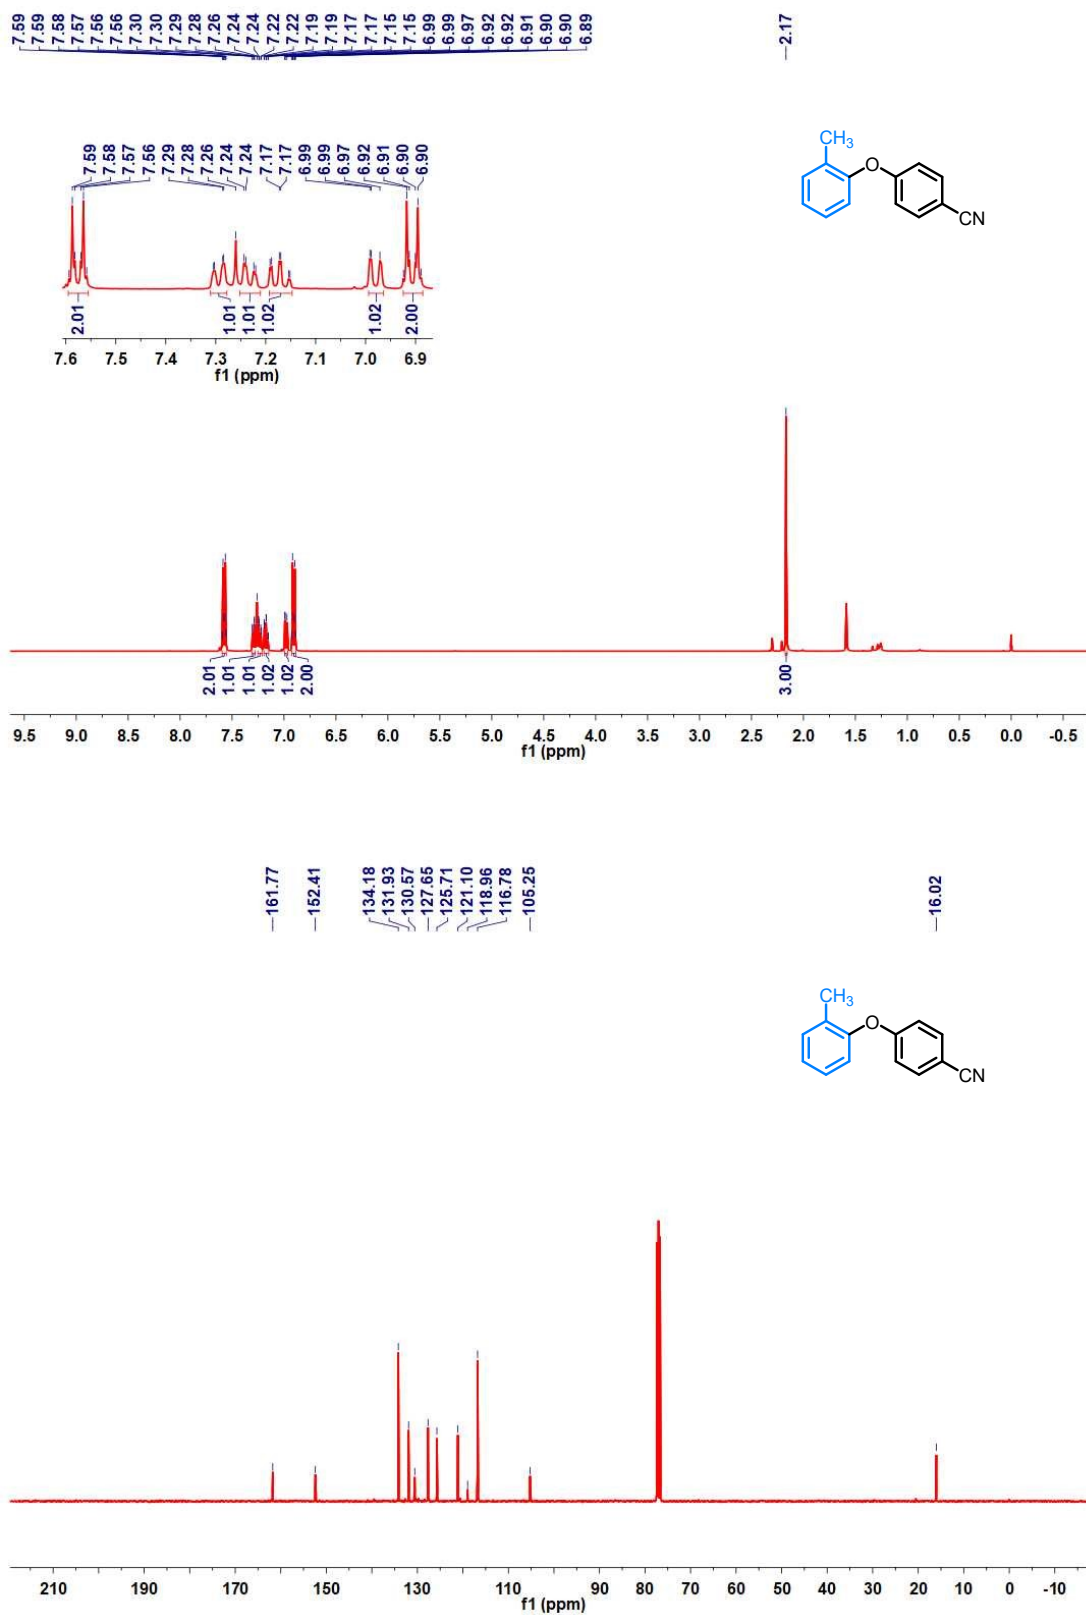

**Fig. S23.** The  $^1\text{H}$  (400 MHz) and  $^{13}\text{C}$  (101 MHz) NMR spectra for 4-(2-methoxyphenoxy)benzonitrile (**C17**) in  $\text{CDCl}_3$ .

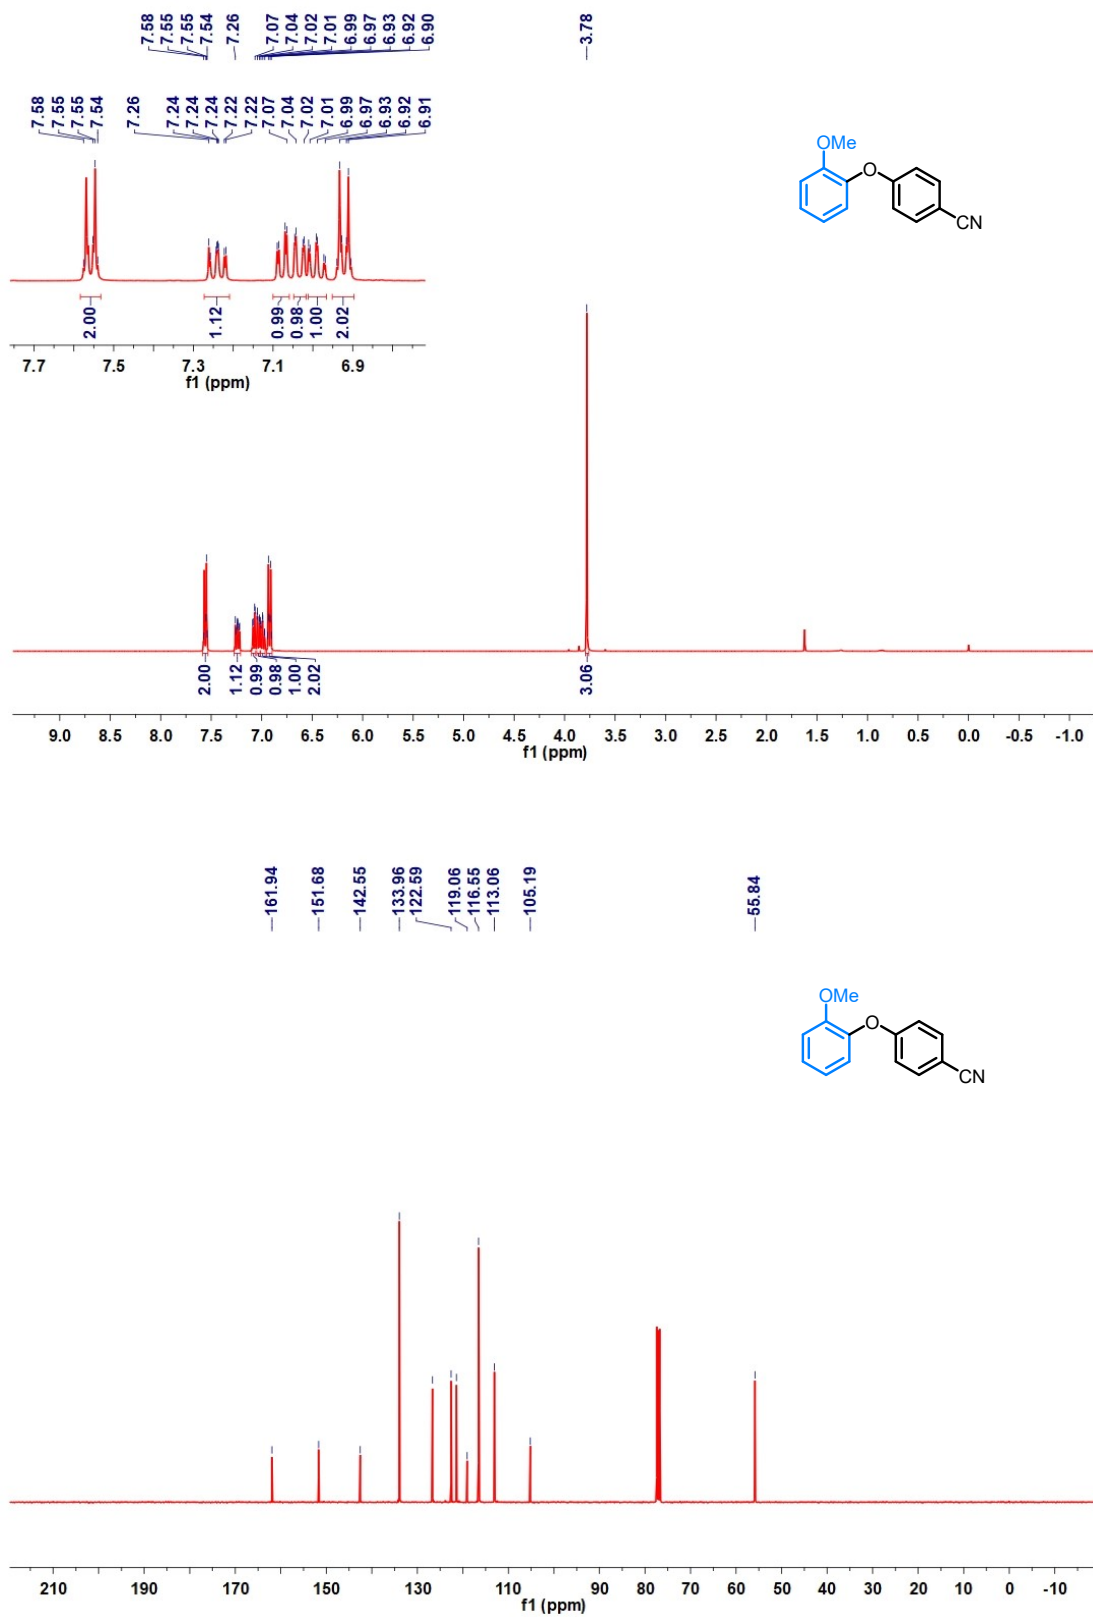

**Fig. S24.** The  $^1\text{H}$  (400 MHz) and  $^{13}\text{C}$  (101 MHz) NMR spectra for 4-(2-(methylthio)phenoxy)benzonitrile (**C18**) in  $\text{CDCl}_3$ .

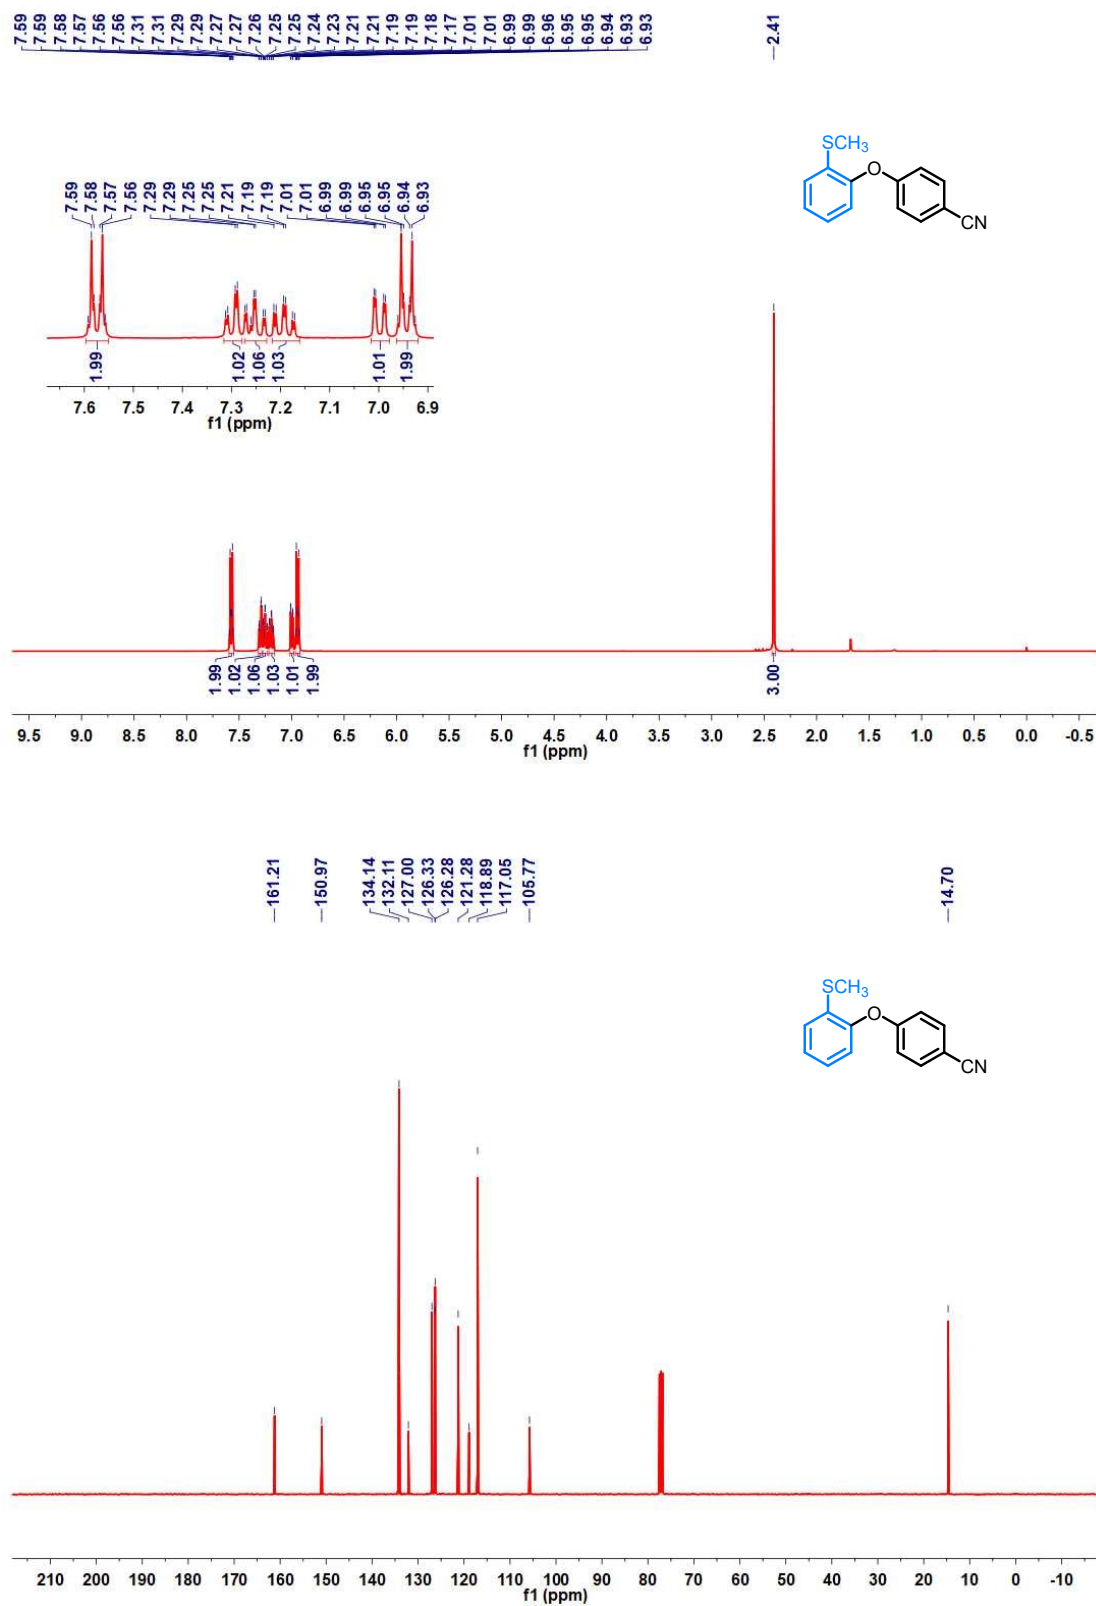

**Fig. S25.** The  $^1\text{H}$  (400 MHz) and  $^{13}\text{C}$  (101 MHz) NMR spectra for 4-(2-chlorophenoxy)benzonitrile (**C19**) in  $\text{CDCl}_3$ .

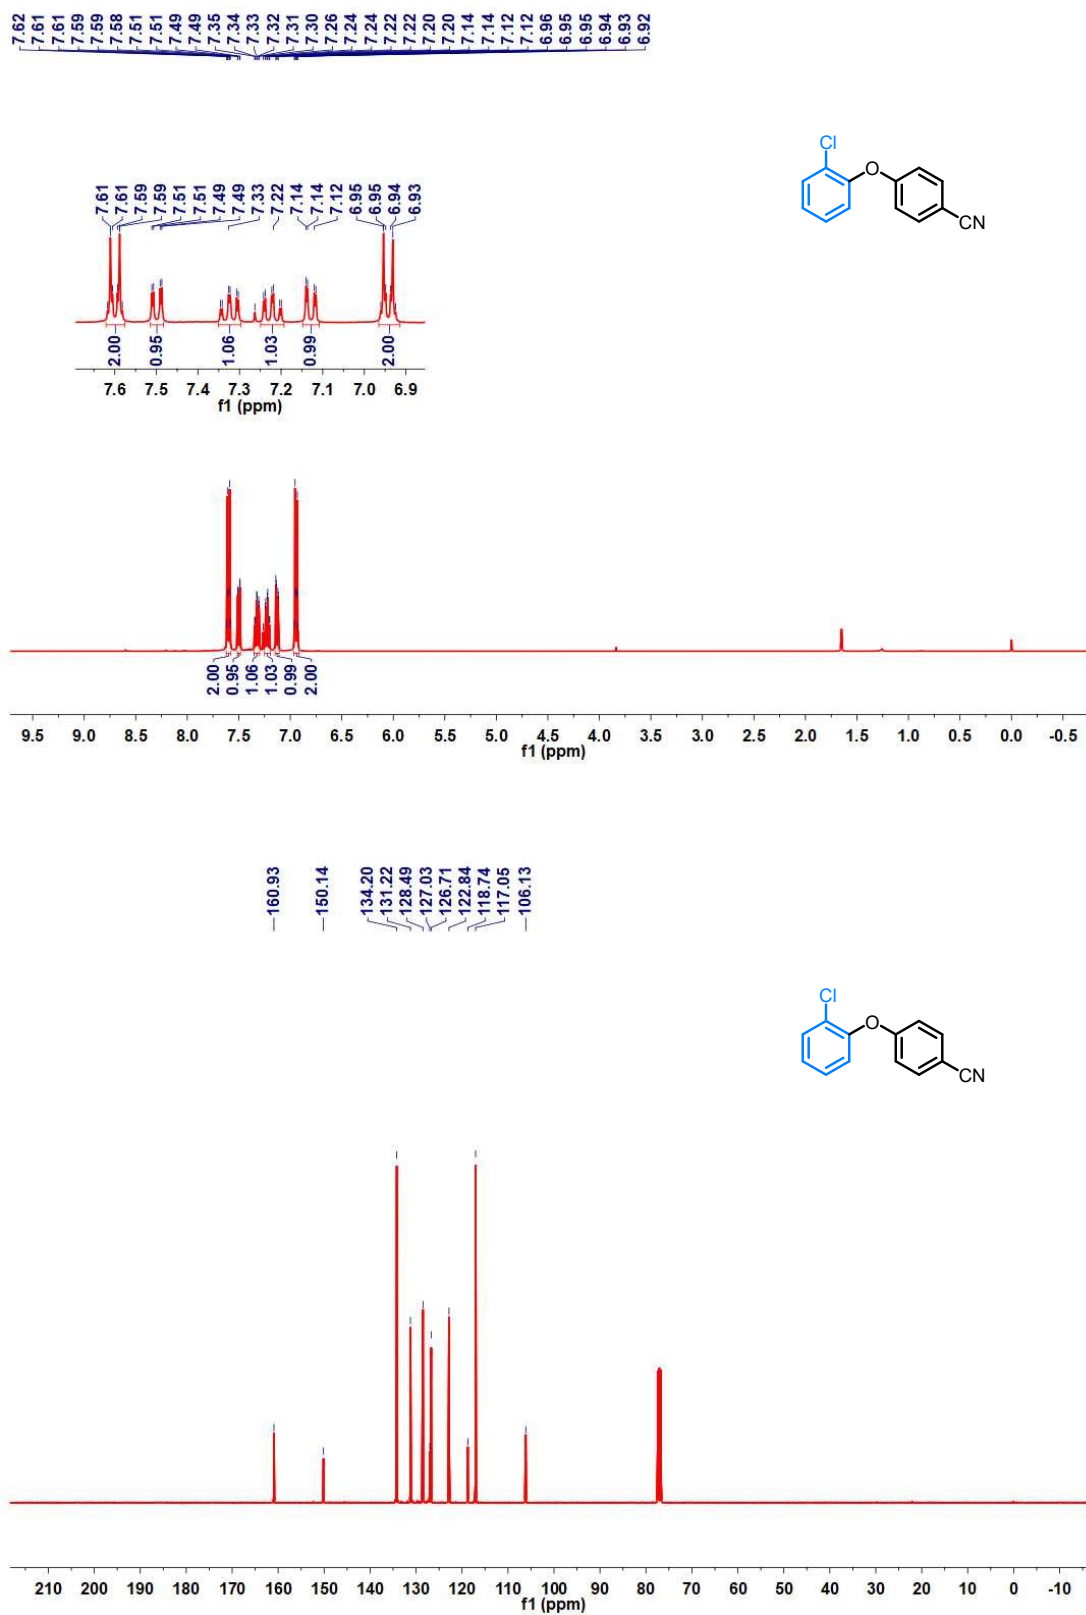

**Fig. S26.** The  $^1\text{H}$  (400 MHz) and  $^{13}\text{C}$  (101 MHz) NMR spectra for 4-(2-chloro-4-methylphenoxy)benzonitrile (**C20**) in  $\text{CDCl}_3$ .

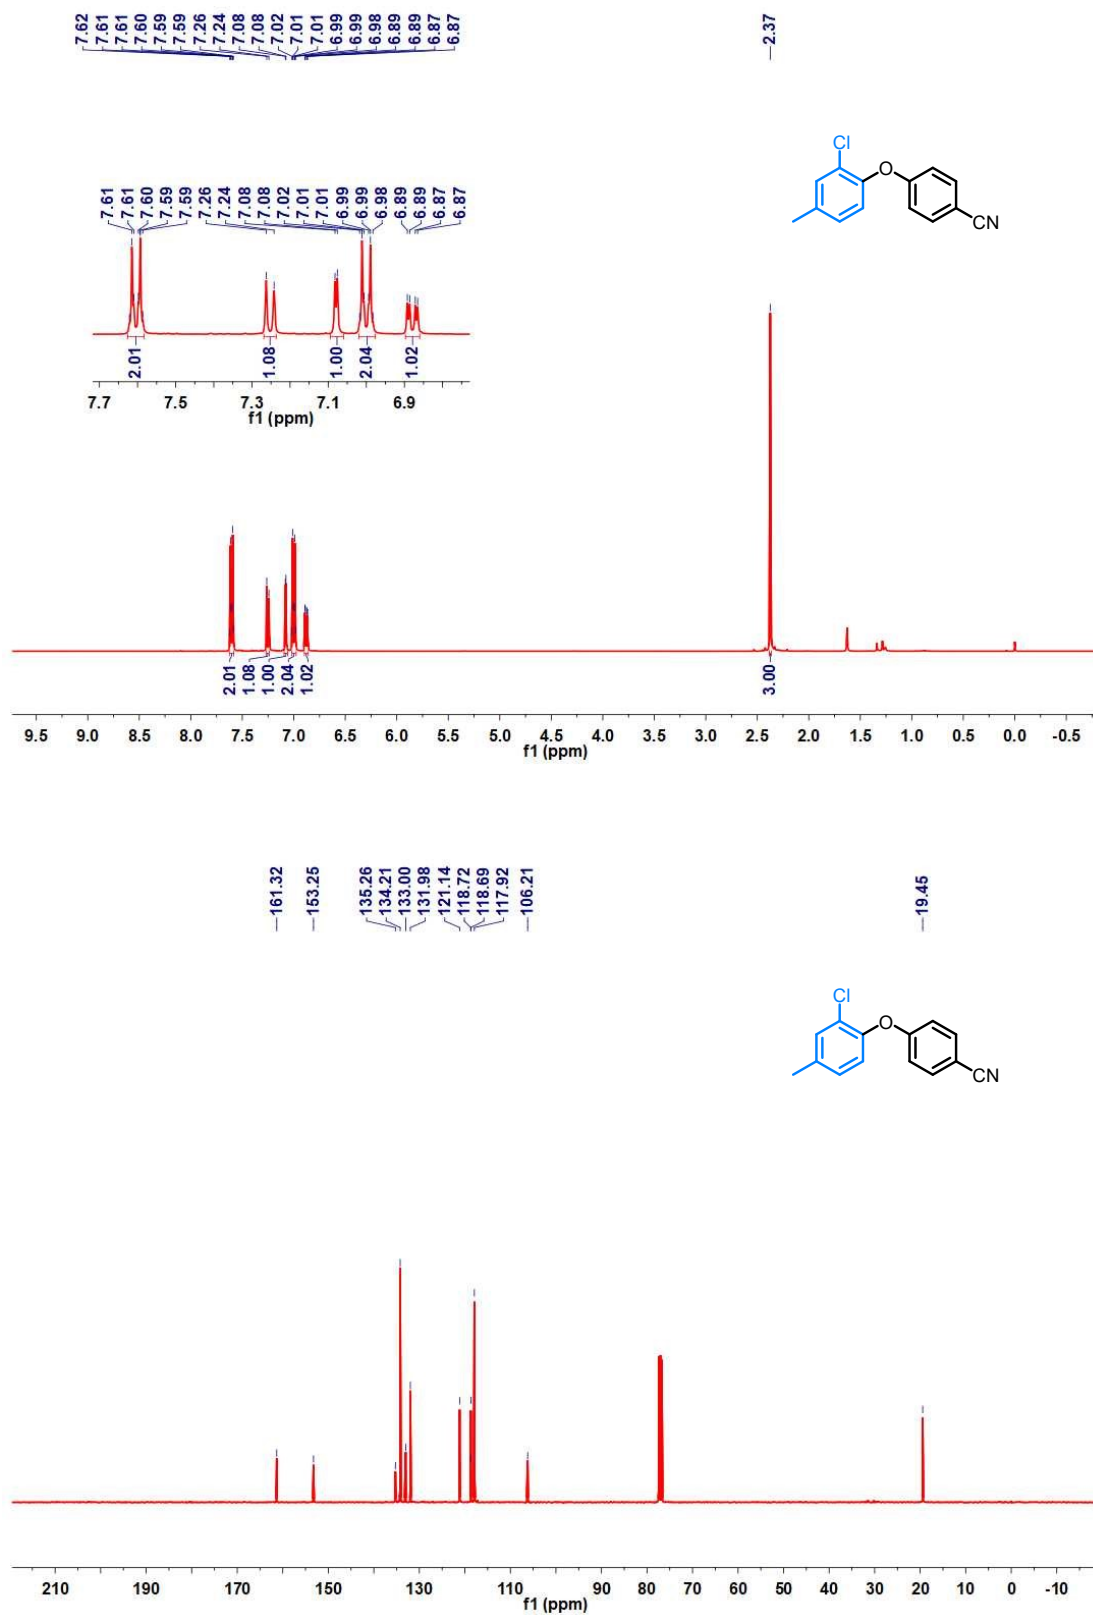

**Fig. S27.** The  $^1\text{H}$  (400 MHz) and  $^{13}\text{C}$  (101 MHz) NMR spectra for 4-([1,1'-biphenyl]-2-yloxy)benzonitrile (**C21**) in  $\text{CDCl}_3$ .

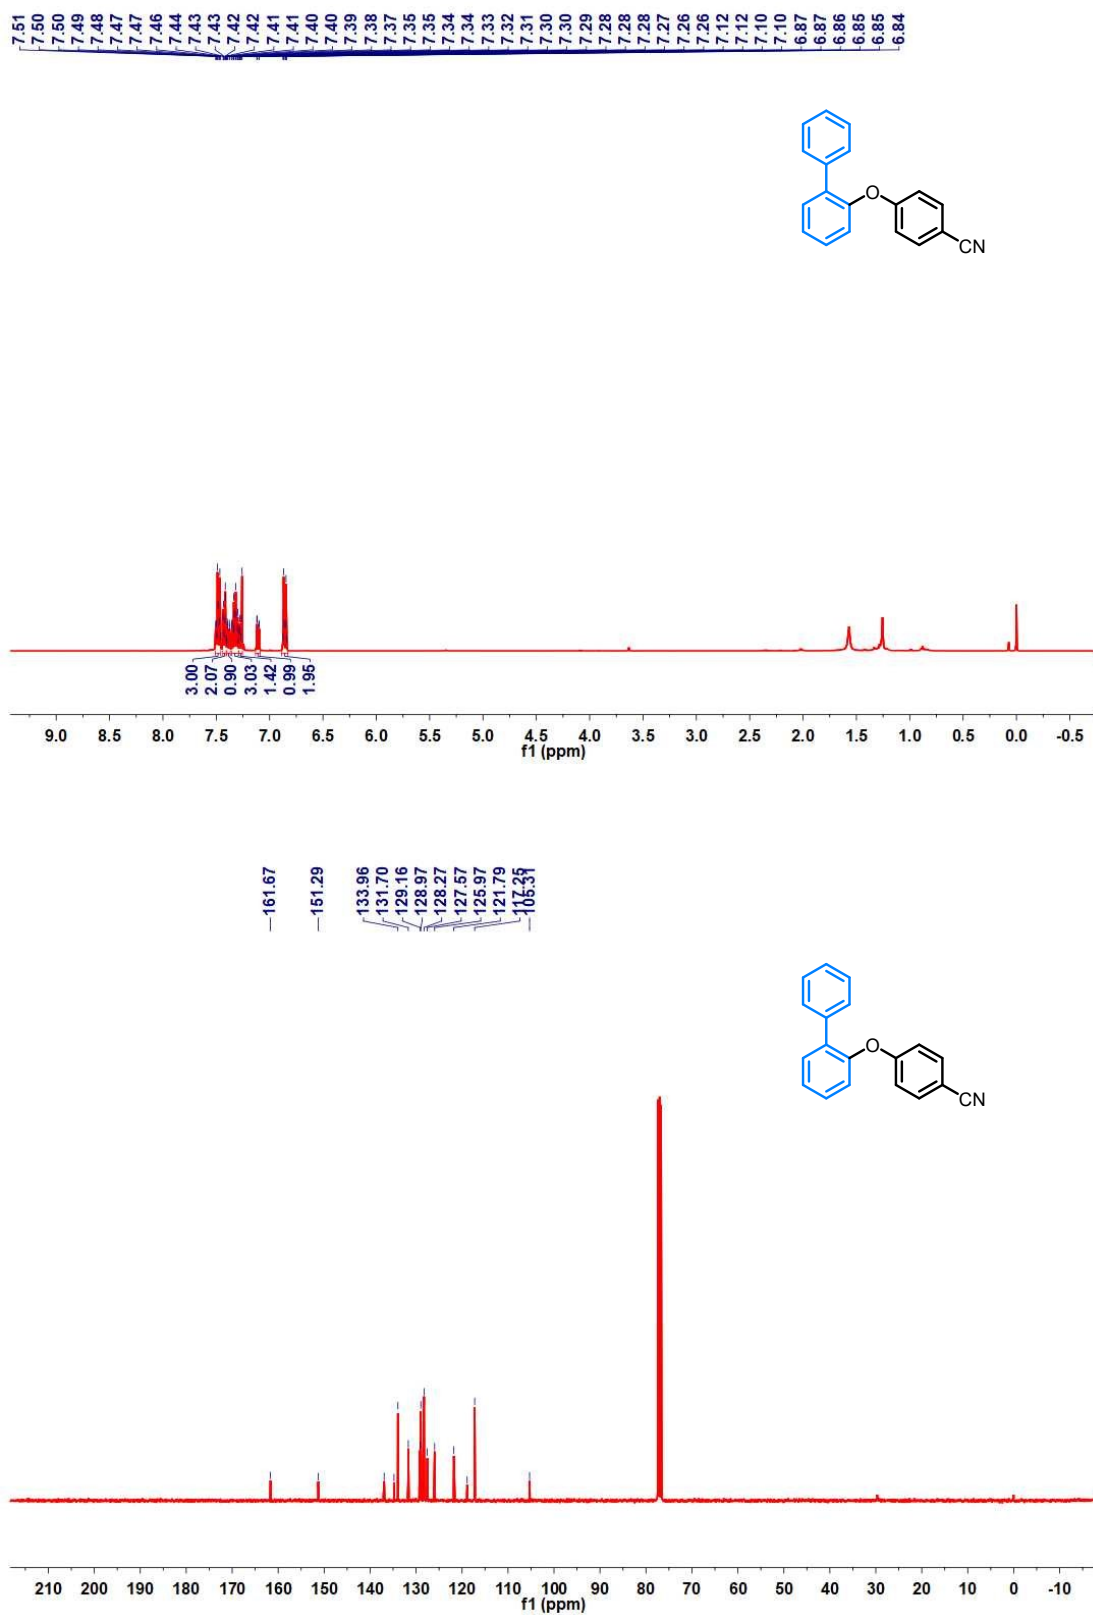



**Fig. S28.** The  $^1\text{H}$  (400 MHz) and  $^{13}\text{C}$  (101 MHz) NMR spectra for 4-(2,6-dimethylphenoxy)benzonitrile (**C22**) in  $\text{CDCl}_3$ .

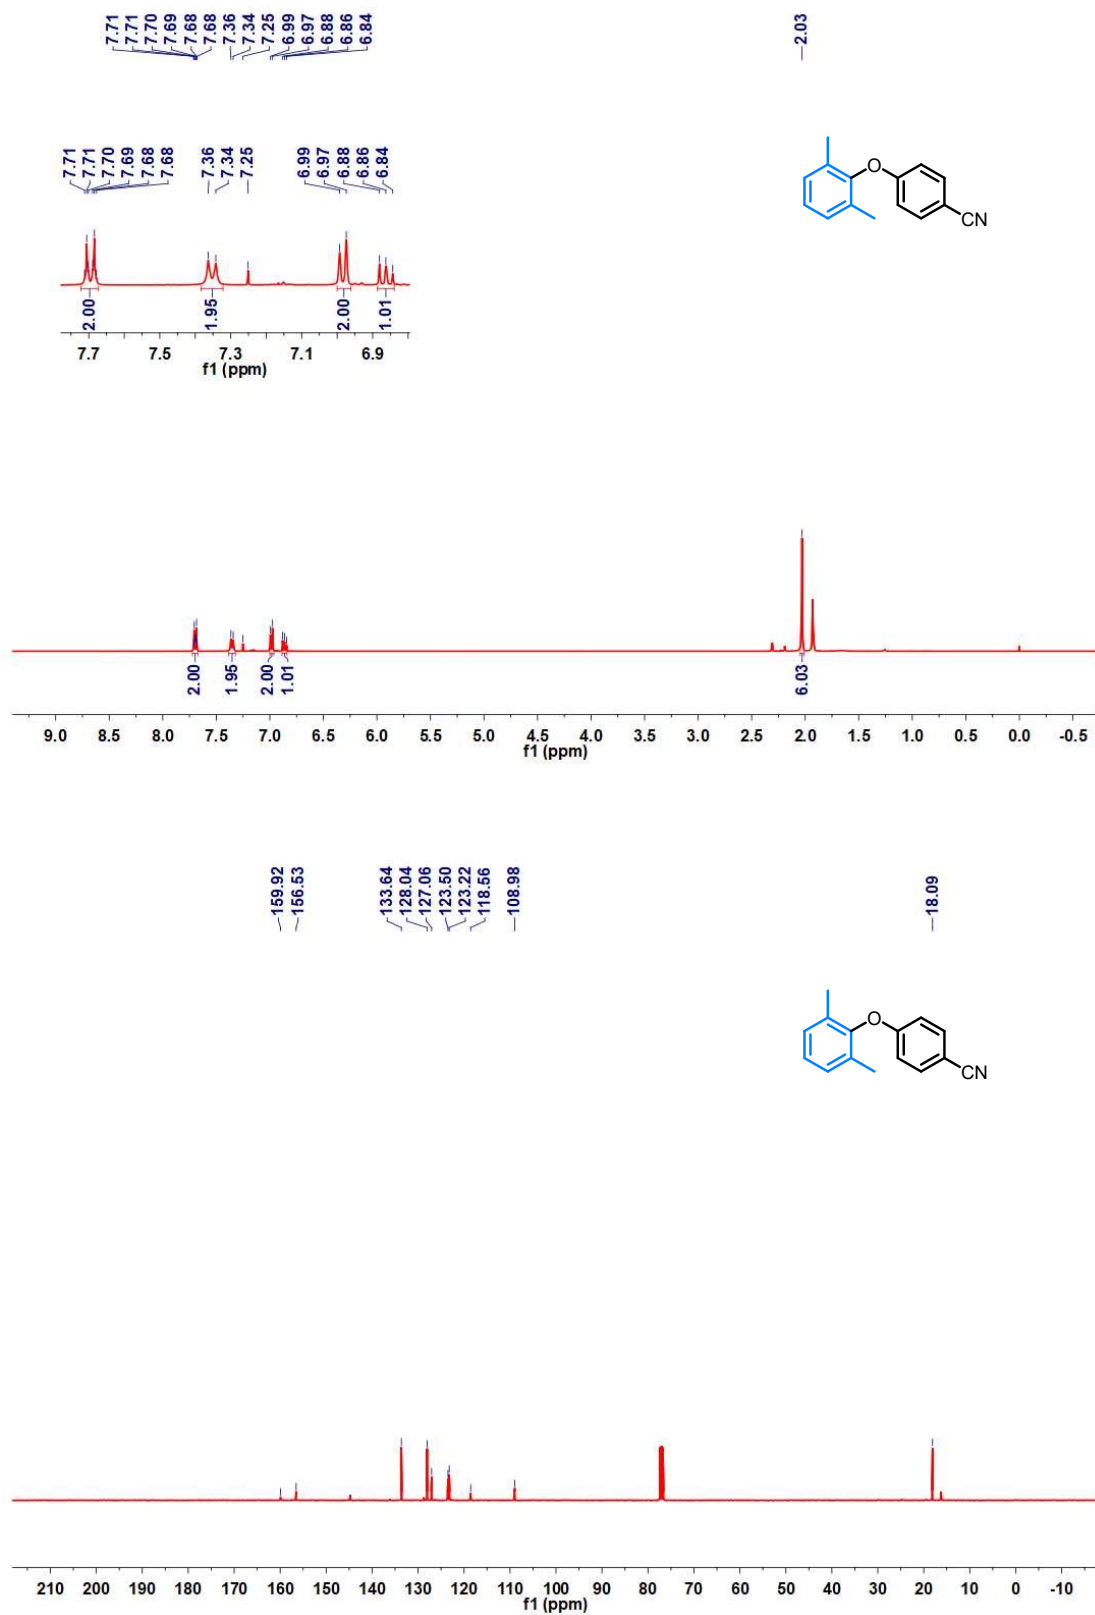

**Fig. S29.** The  $^1\text{H}$  (400 MHz) and  $^{13}\text{C}$  (101 MHz) NMR spectra for 4-(benzo[d]thiazol-5-yloxy)benzonitrile (**C23**) in  $\text{CDCl}_3$ .

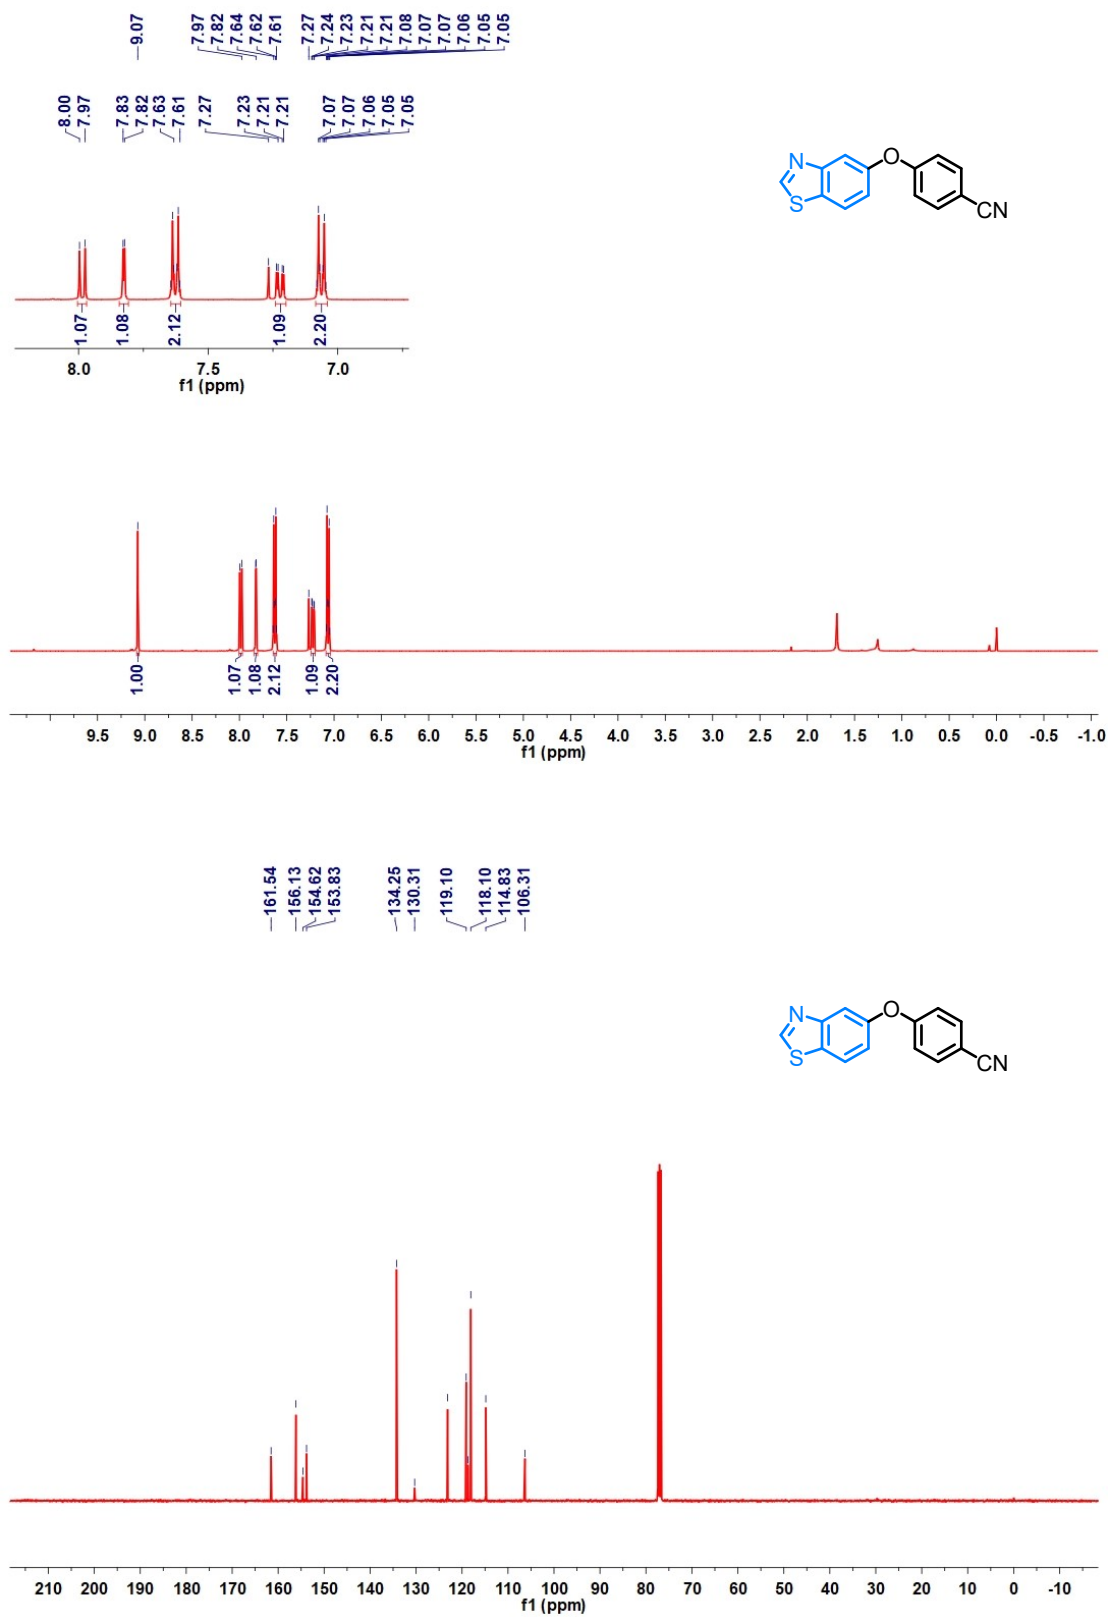

**Fig. S30.** The  $^1\text{H}$  (400 MHz) and  $^{13}\text{C}$  (101 MHz) NMR spectra for 4-((1-methyl-1H-pyrazol-3-yl)oxy)benzonitrile (**C24**) in  $\text{CDCl}_3$ .

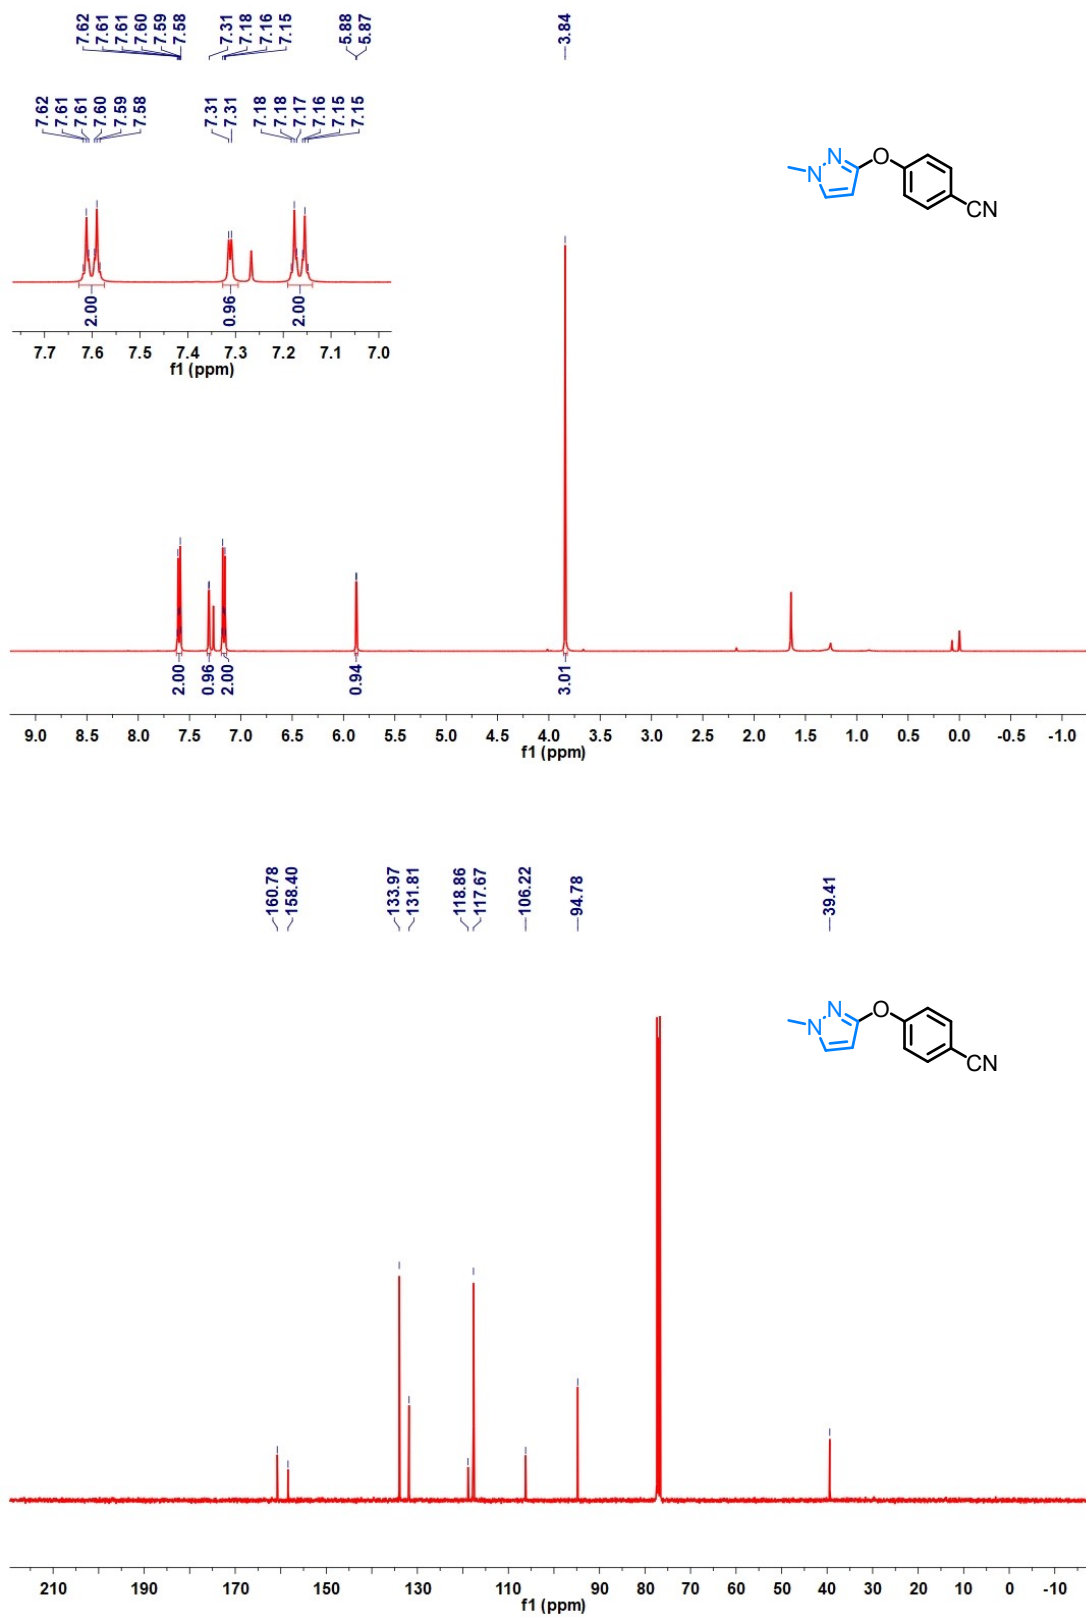

**Fig. S31.** The  $^1\text{H}$  (400 MHz) and  $^{13}\text{C}$  (101 MHz) NMR spectra for 4-((4-methyl-2-oxo-2H-chromen-7-yl)oxy)benzotrile (**C25**) in  $\text{CDCl}_3$ .

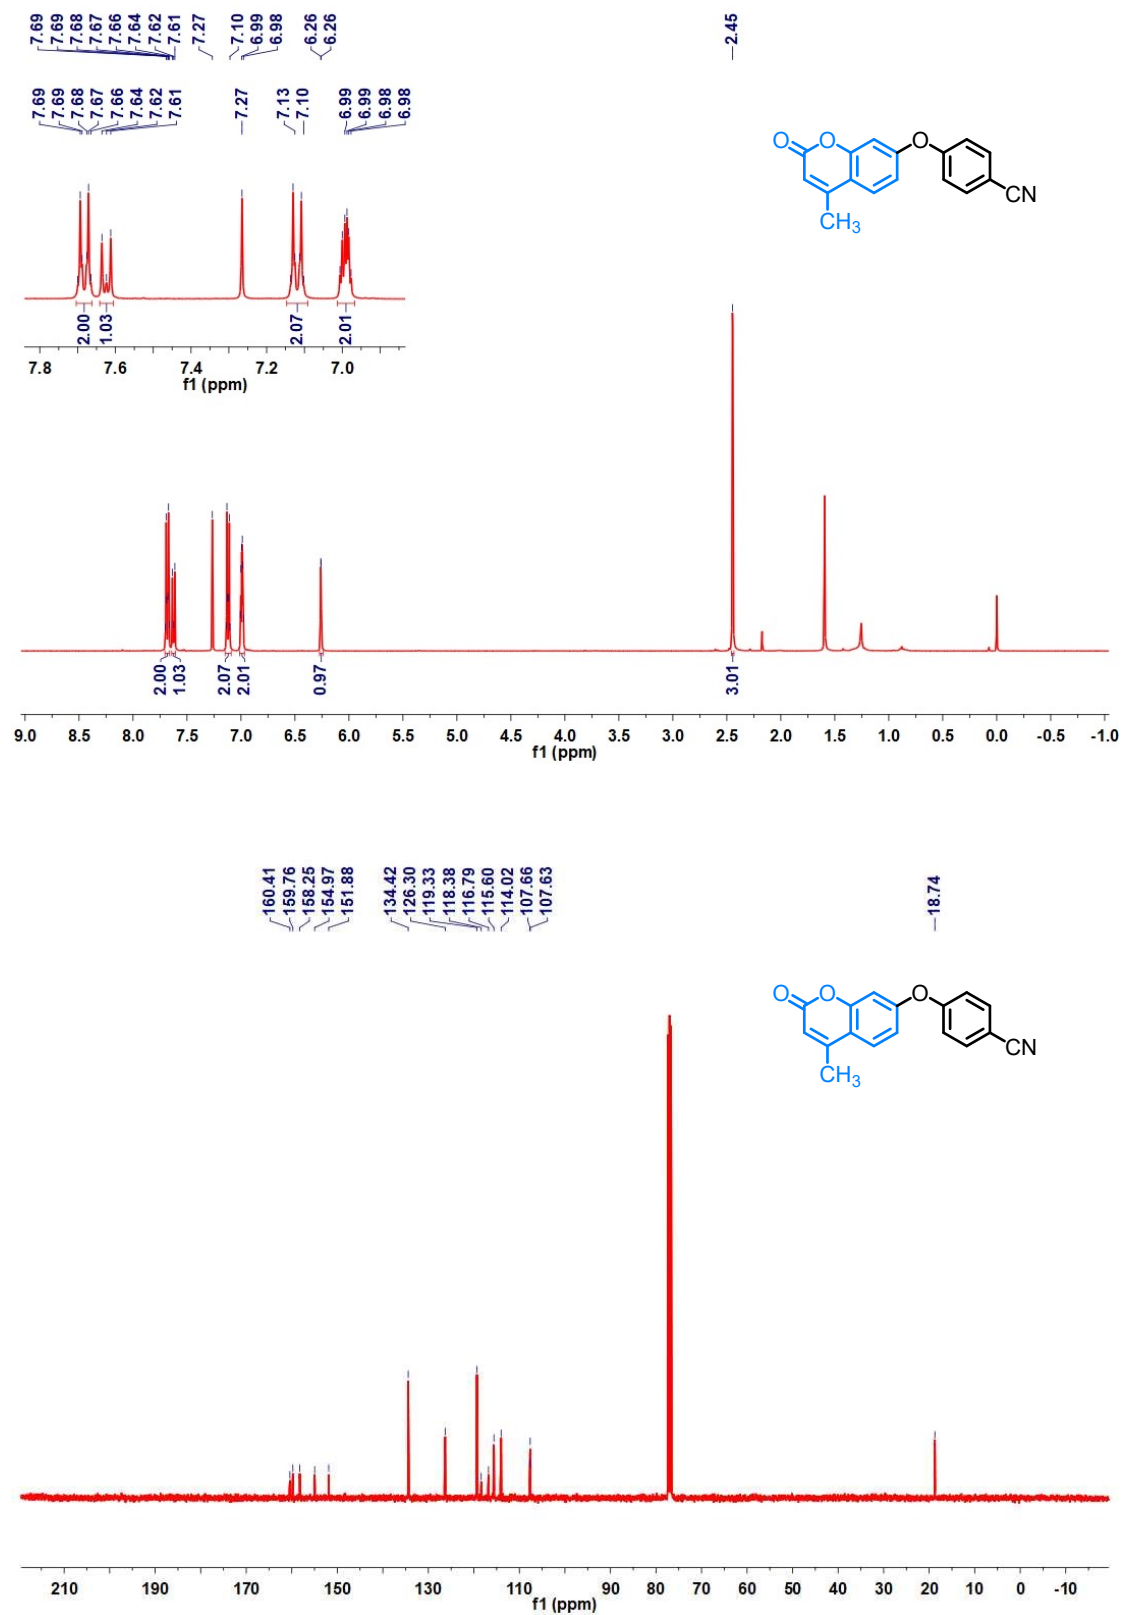

**Fig. S32.** The  $^1\text{H}$  (400 MHz) and  $^{13}\text{C}$  (101 MHz) NMR spectra for 1-(4-(4-methoxyphenoxy)phenyl)ethan-1-one (**C26**) in  $\text{CDCl}_3$ .

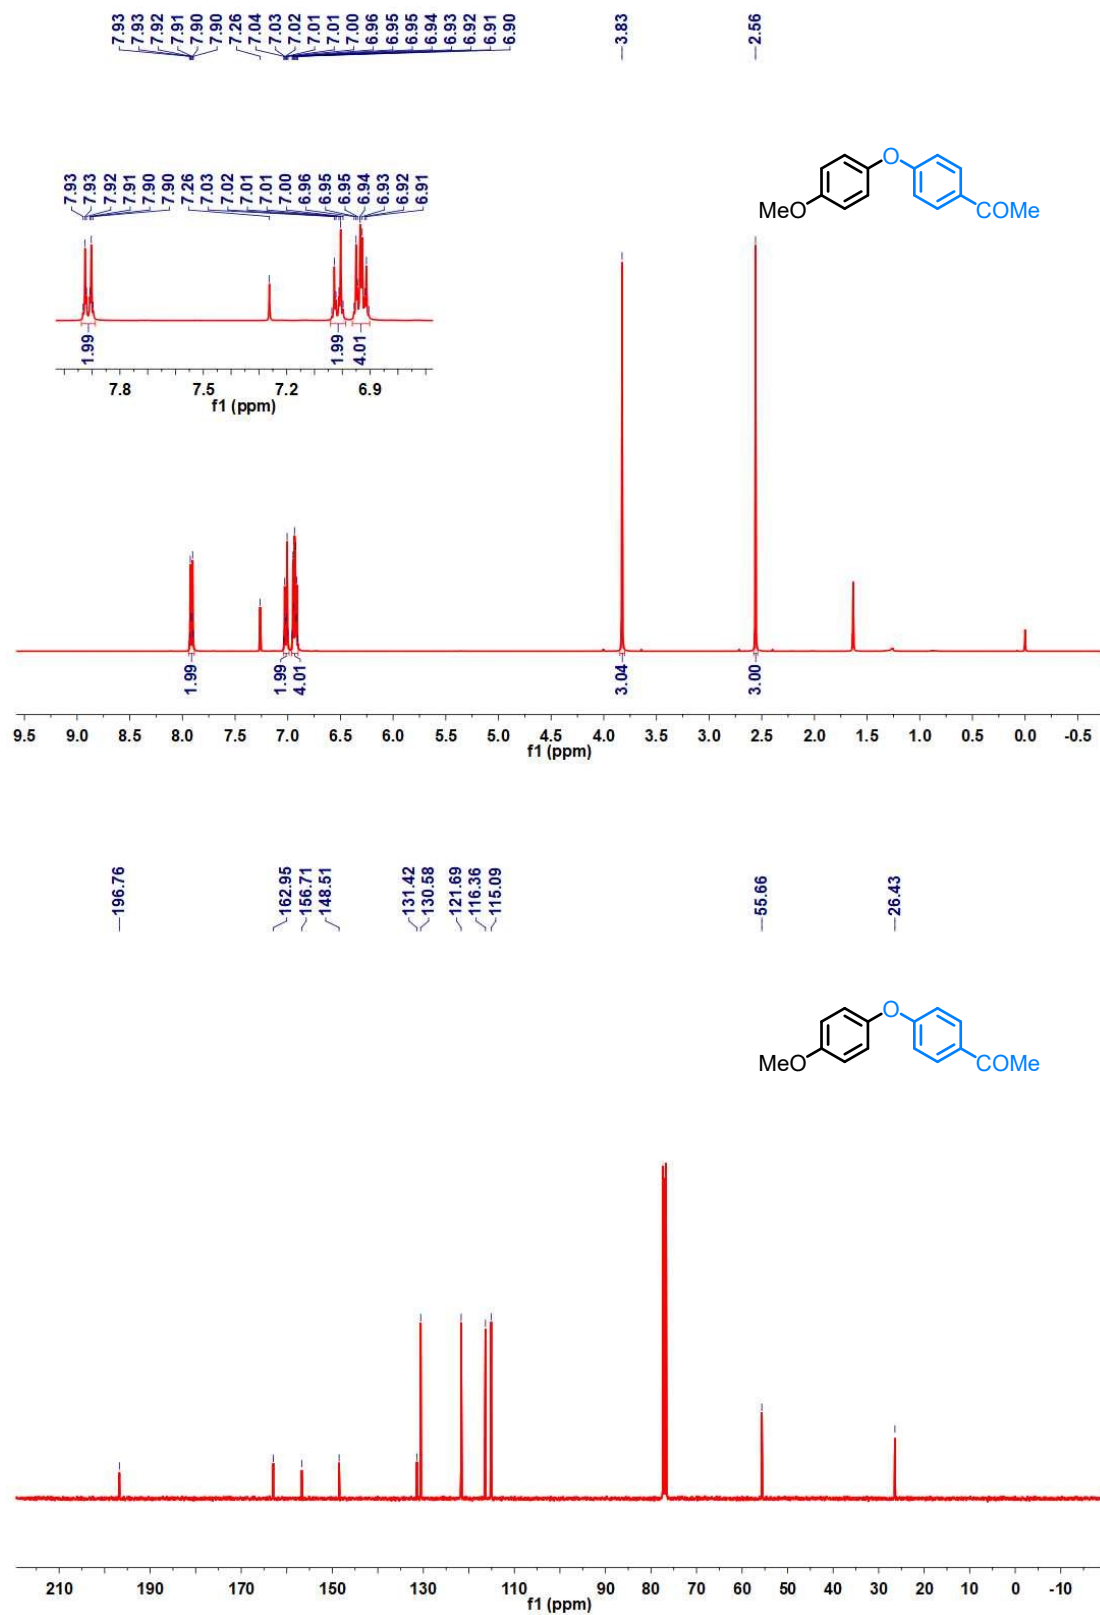

**Fig. S33.** The  $^1\text{H}$  (400 MHz) and  $^{13}\text{C}$  (101 MHz) NMR spectra for 1-(4-(4-methoxyphenoxy)phenyl)propan-1-one (**C27**) in  $\text{CDCl}_3$ .

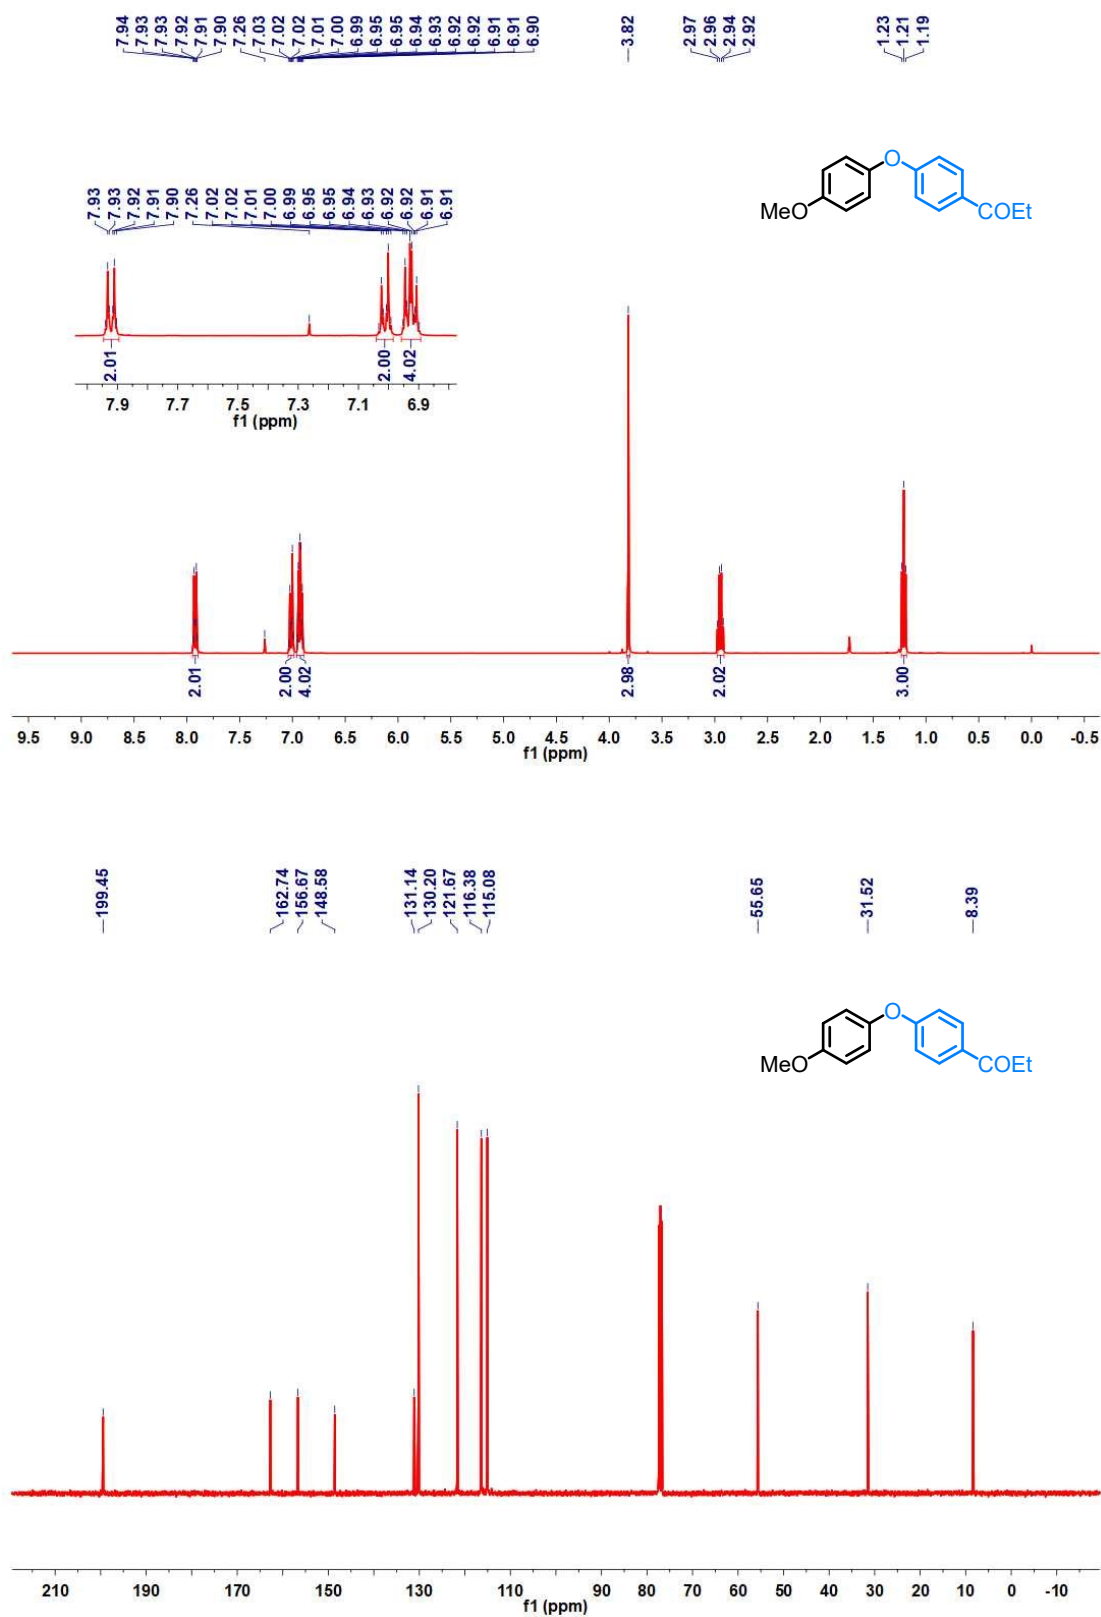

**Fig. S34.** The  $^1\text{H}$  (400 MHz) and  $^{13}\text{C}$  (101 MHz) spectra for methyl 4-(4-methoxyphenoxy)benzoate (**C28**) in  $\text{CDCl}_3$ .

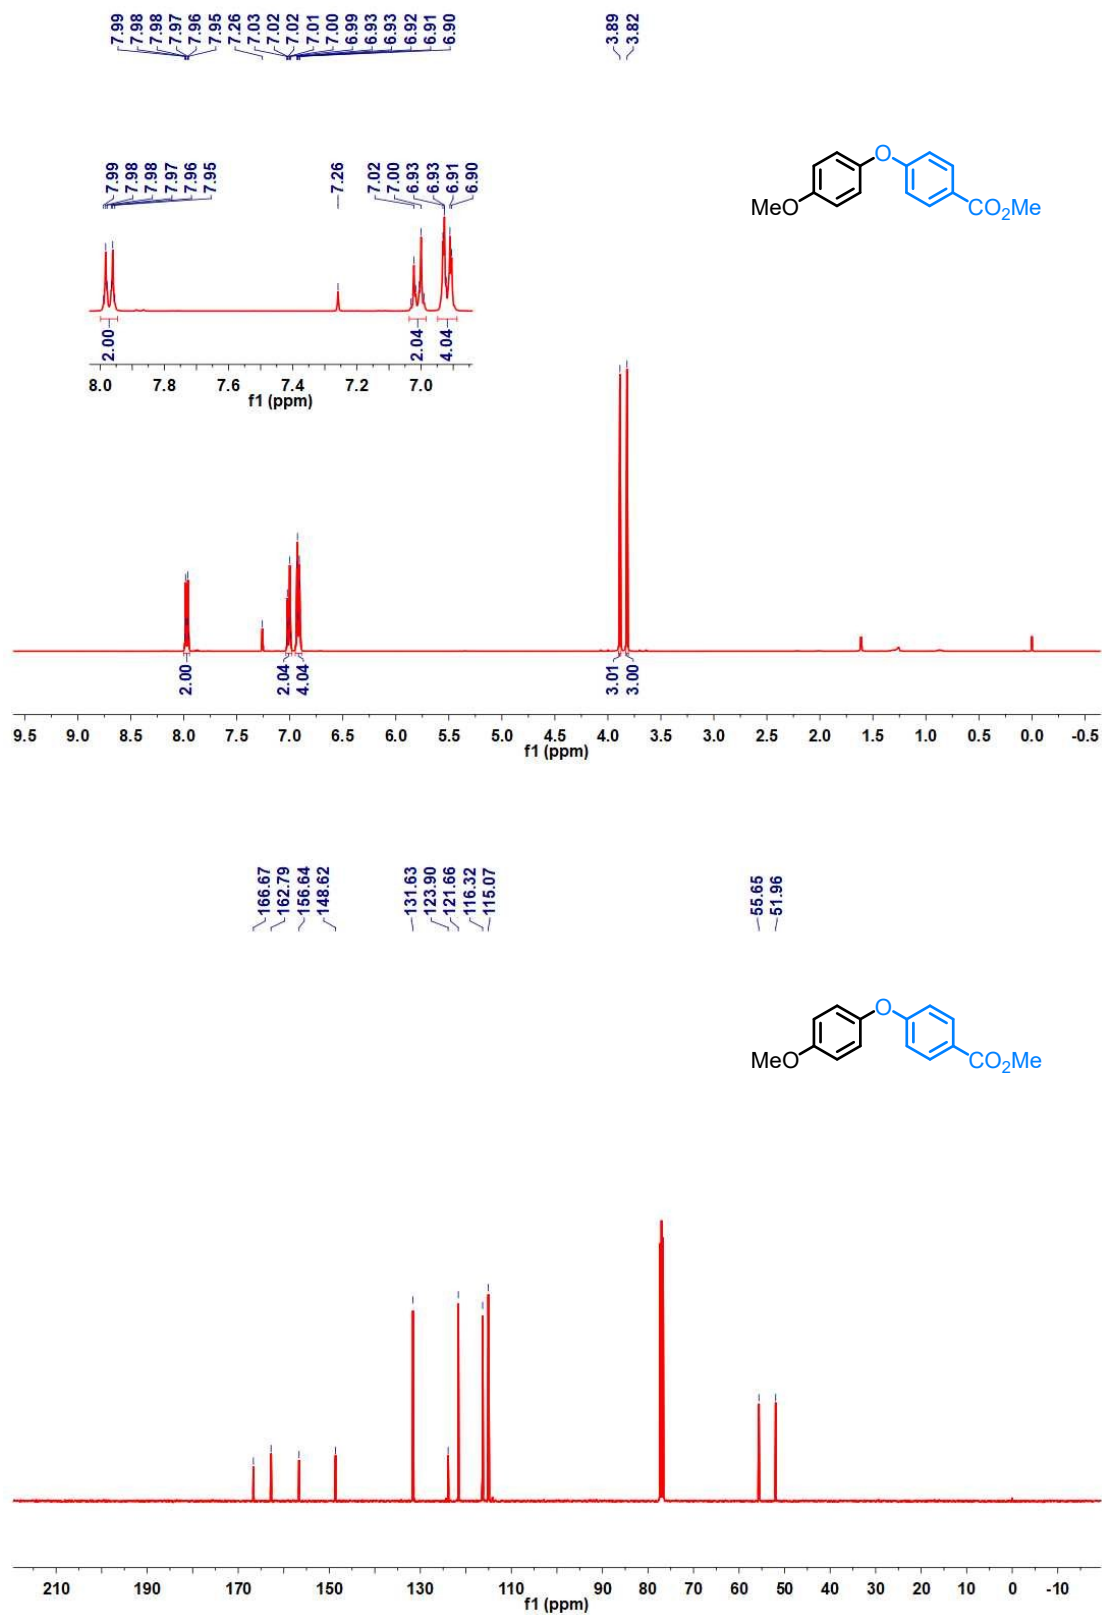

**Fig. S35.** The  $^1\text{H}$  (400 MHz) and  $^{13}\text{C}$  (101 MHz) NMR spectra for ethyl 4-(4-methoxyphenoxy)benzoate (**C29**) in  $\text{CDCl}_3$ .

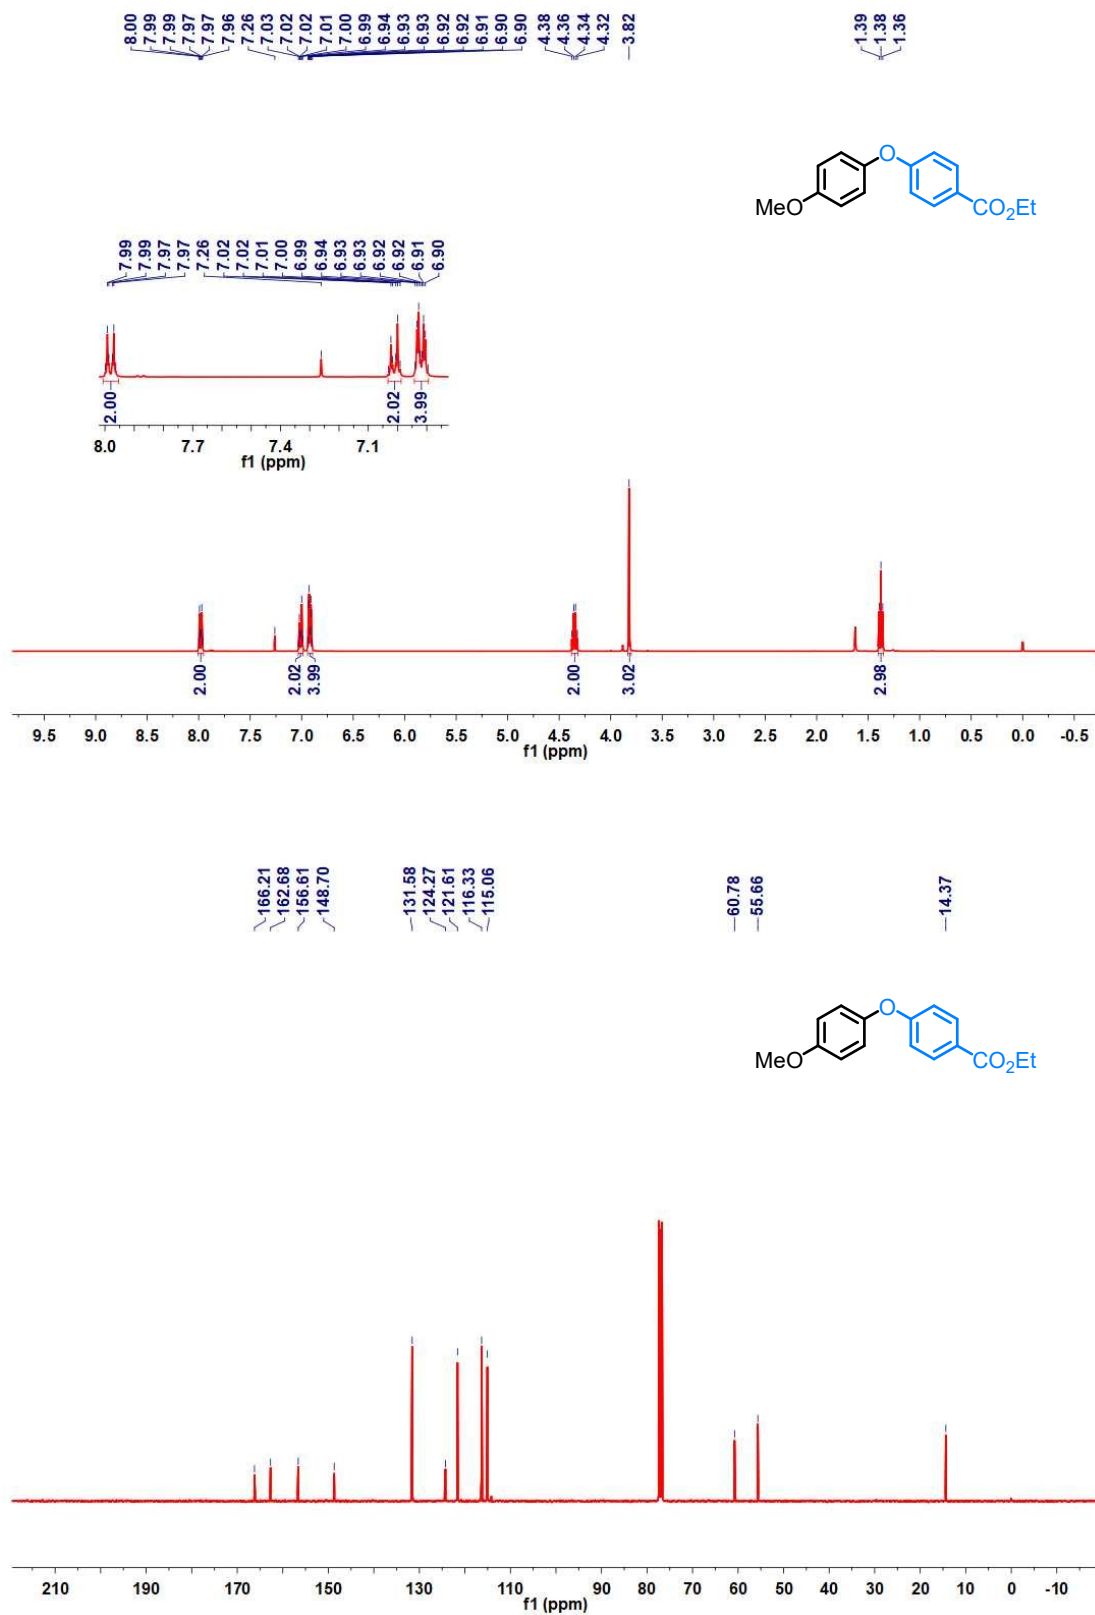



**Fig. S36.** The  $^1\text{H}$  (400 MHz) and  $^{13}\text{C}$  (101 MHz) NMR spectra for (4-(4-methoxyphenoxy)phenyl)(phenyl)methanone (**C30**) in  $\text{CDCl}_3$ .

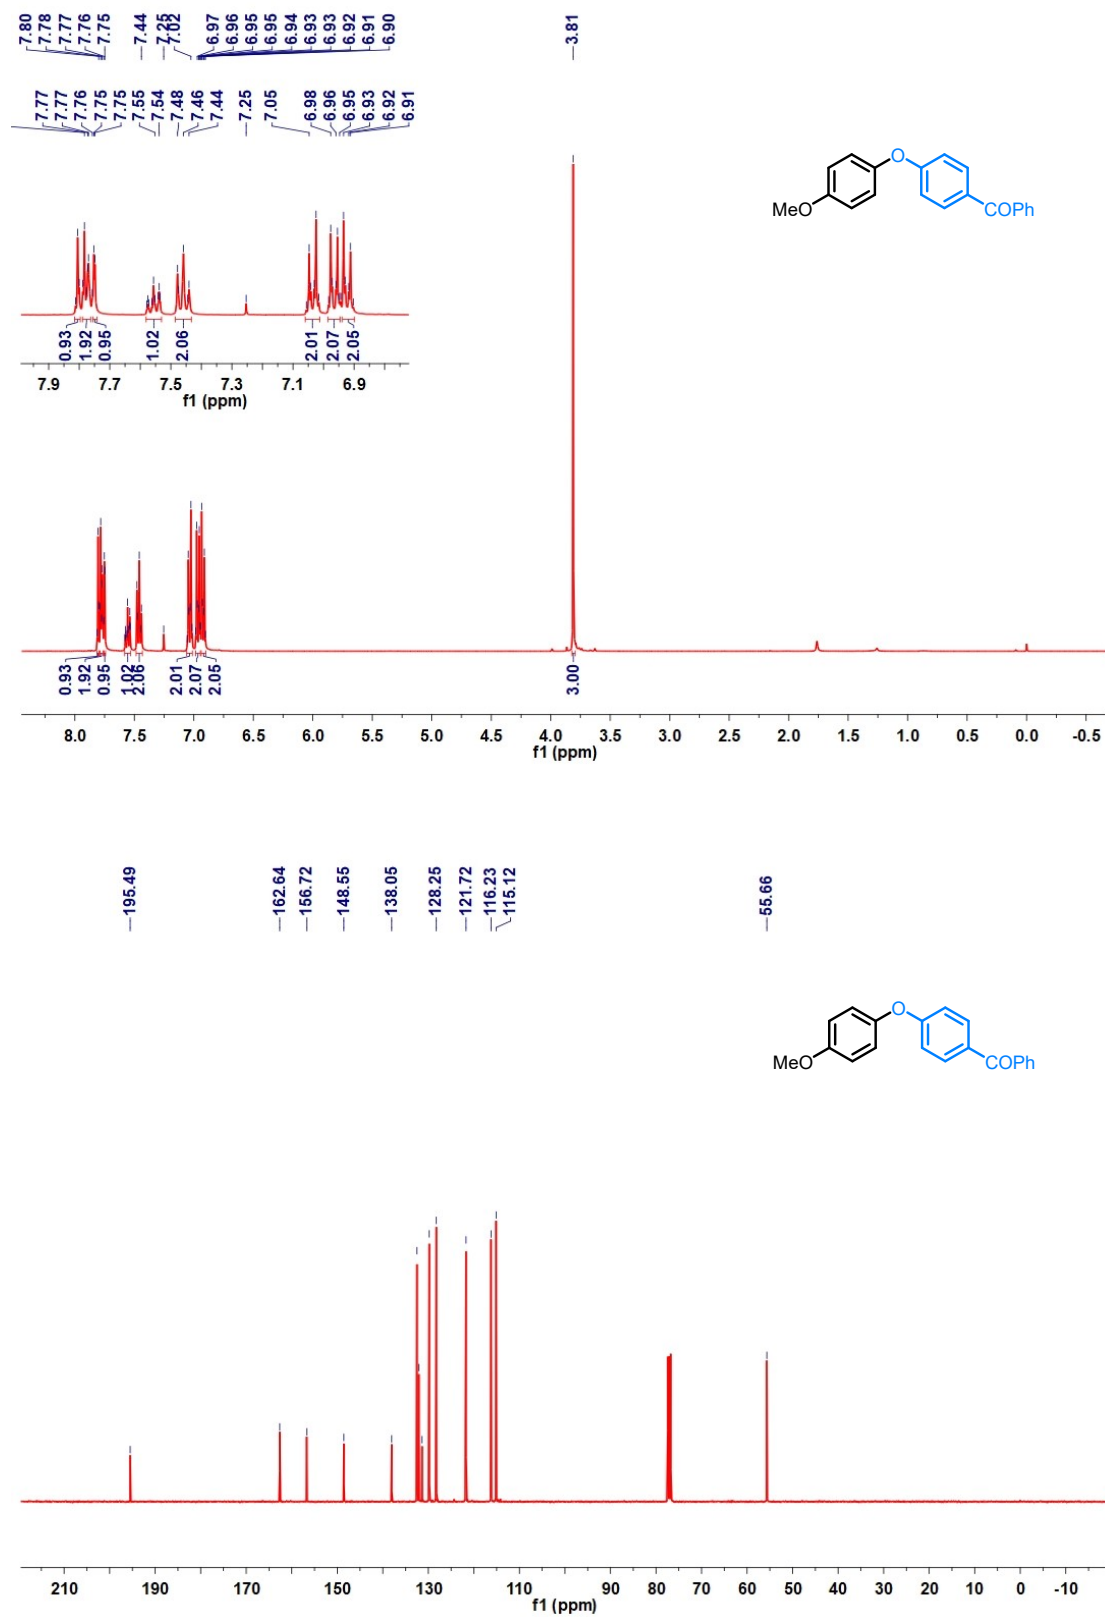

**Fig. S37.** The  $^1\text{H}$  (400 MHz) and  $^{13}\text{C}$  (101 MHz) NMR spectra for 4-(4-methoxyphenoxy)-1,1'-biphenyl (**C31**) in  $\text{CDCl}_3$ .

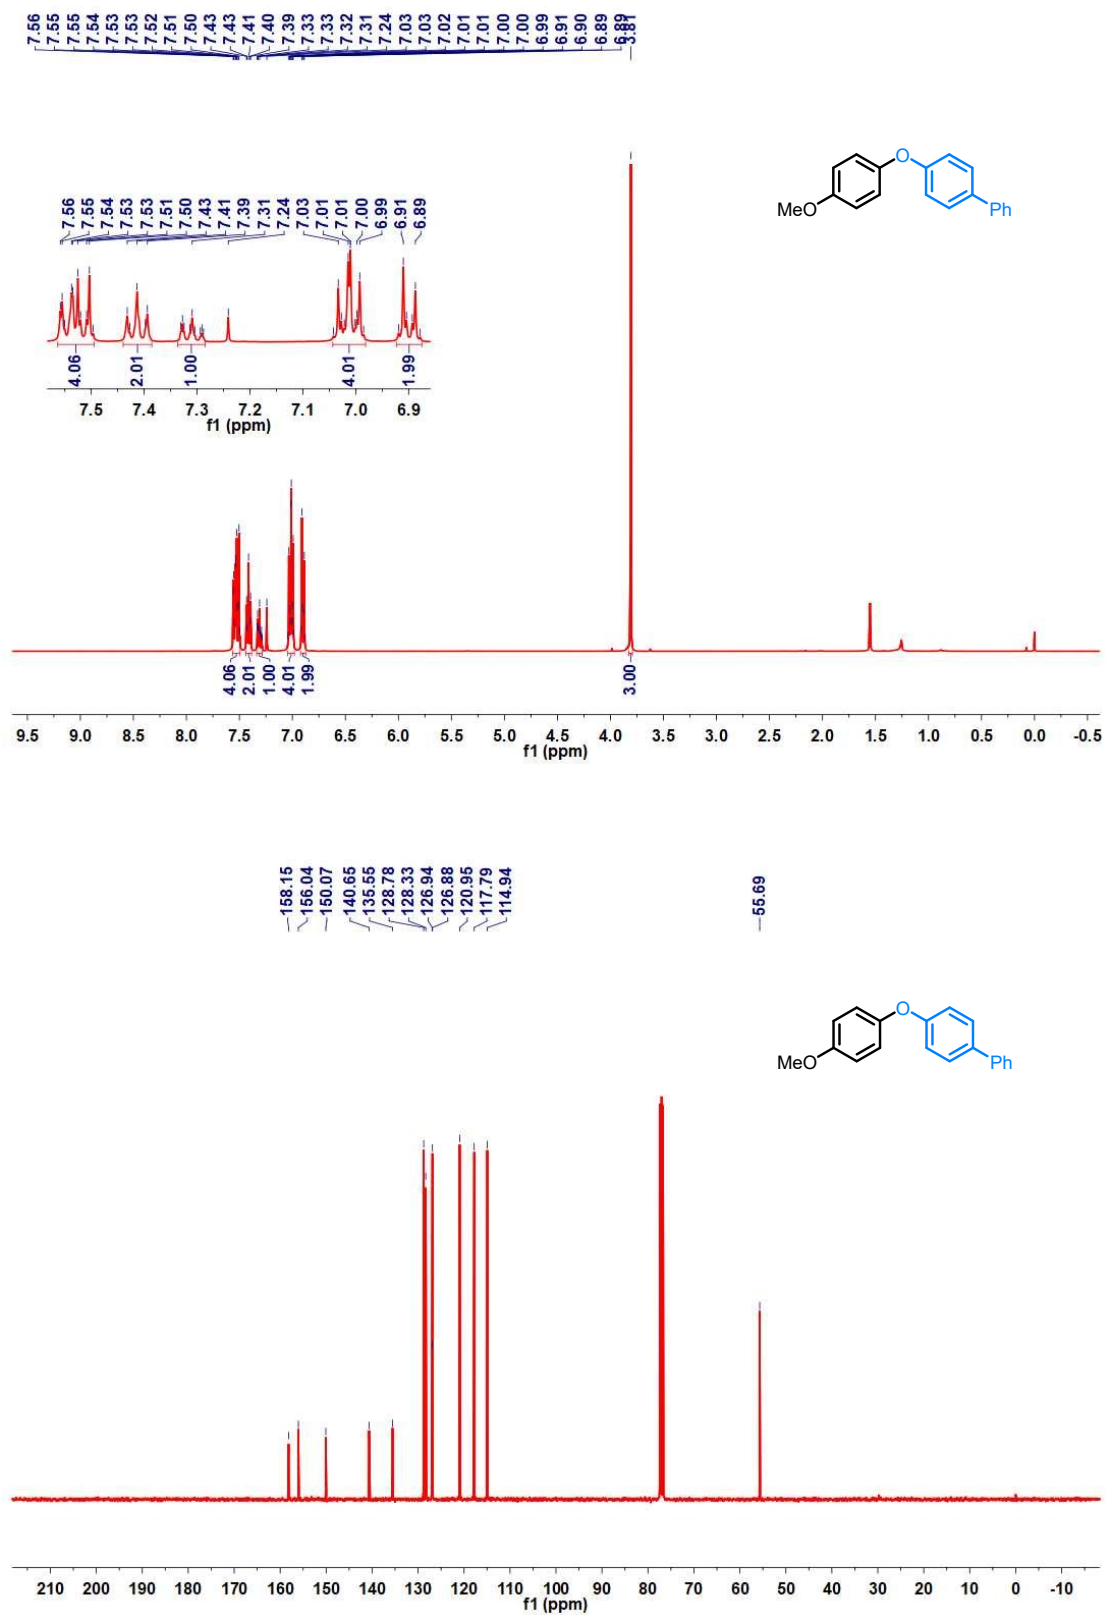

**Fig. S38.** The  $^1\text{H}$  (400 MHz),  $^{13}\text{C}$  (101 MHz) and  $^{19}\text{F}$  (377 MHz) NMR spectra for 1-methoxy-4-(4-(trifluoromethyl)phenoxy)benzene (**C32**) in  $\text{CDCl}_3$ .

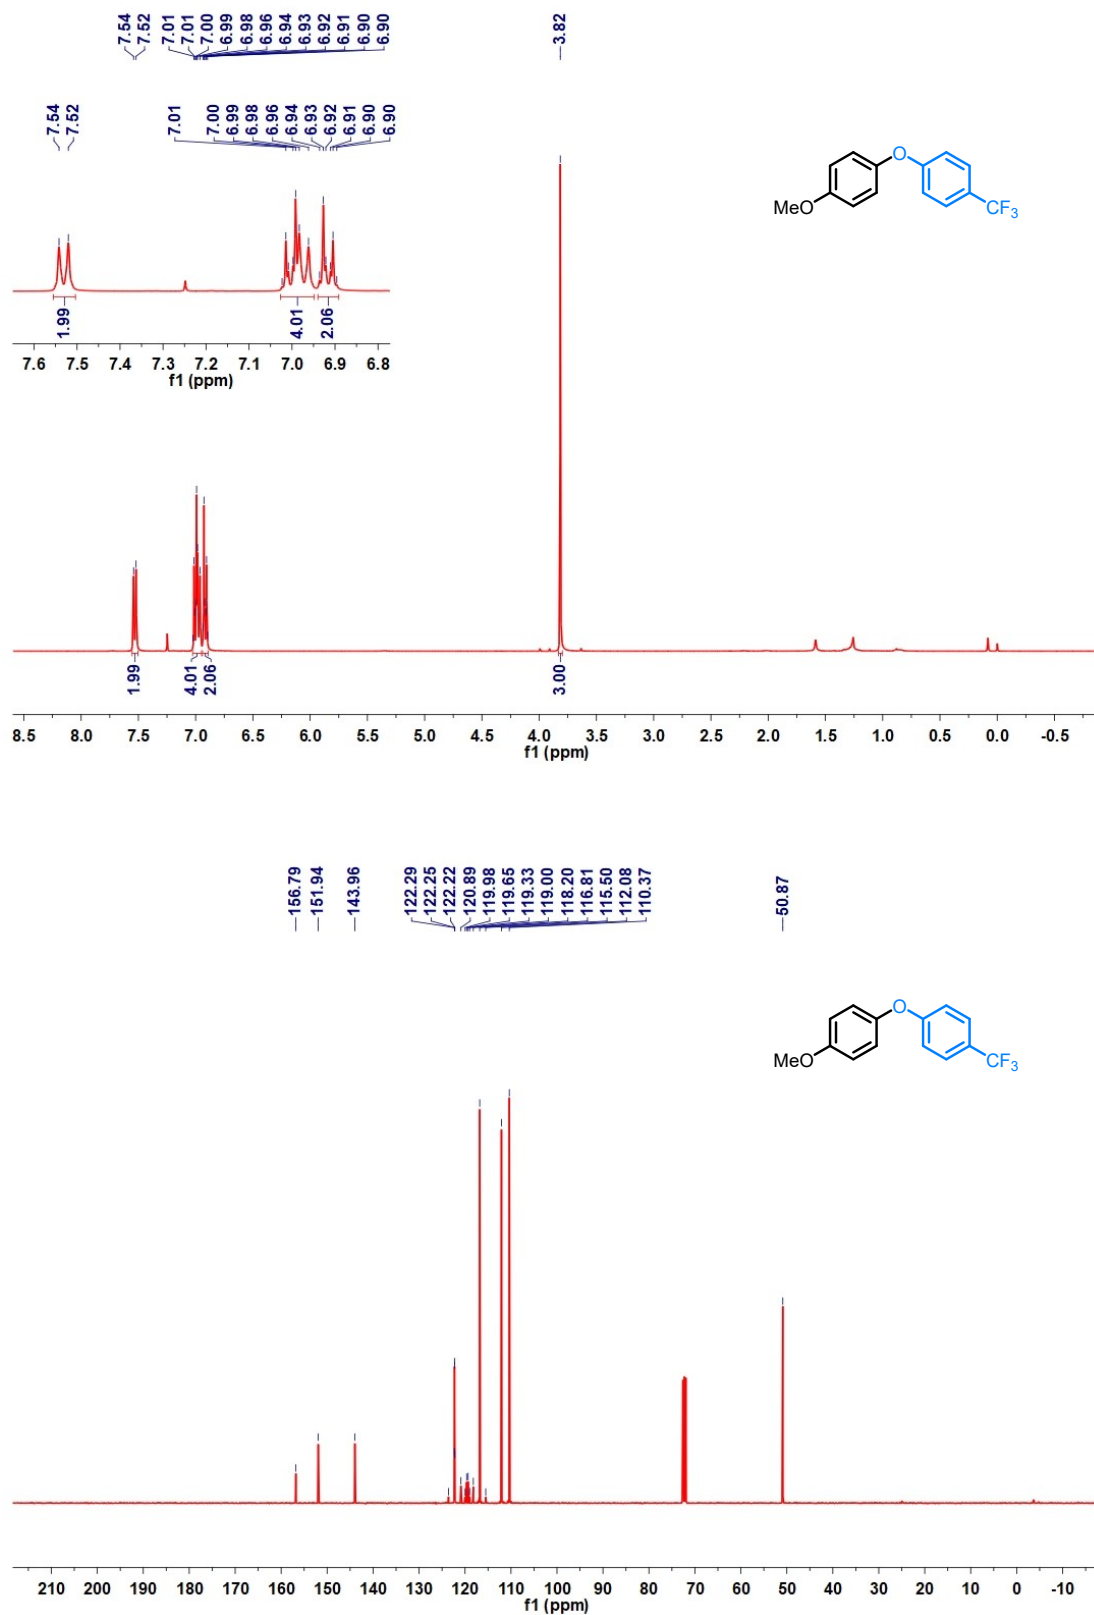

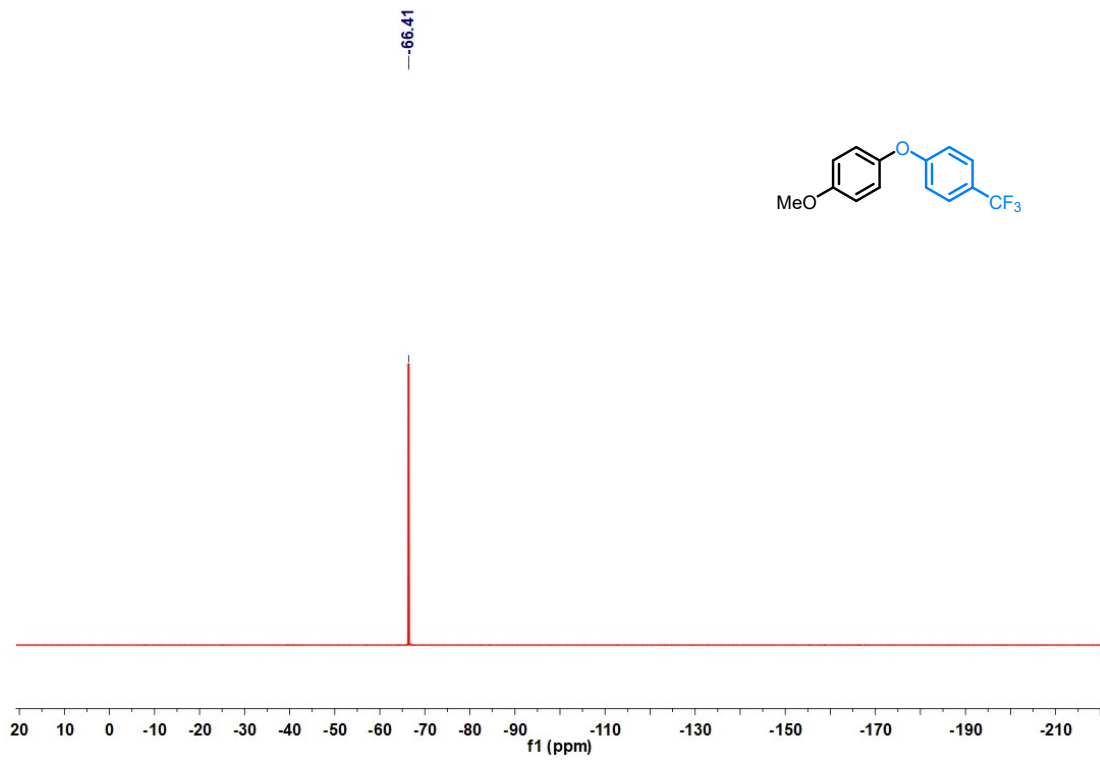

**Fig. S39.** The  $^1\text{H}$  (400 MHz) and  $^{13}\text{C}$  (101 MHz) spectra for 1-chloro-4-(4-methoxyphenoxy)benzene (**C33**) in  $\text{CDCl}_3$ .

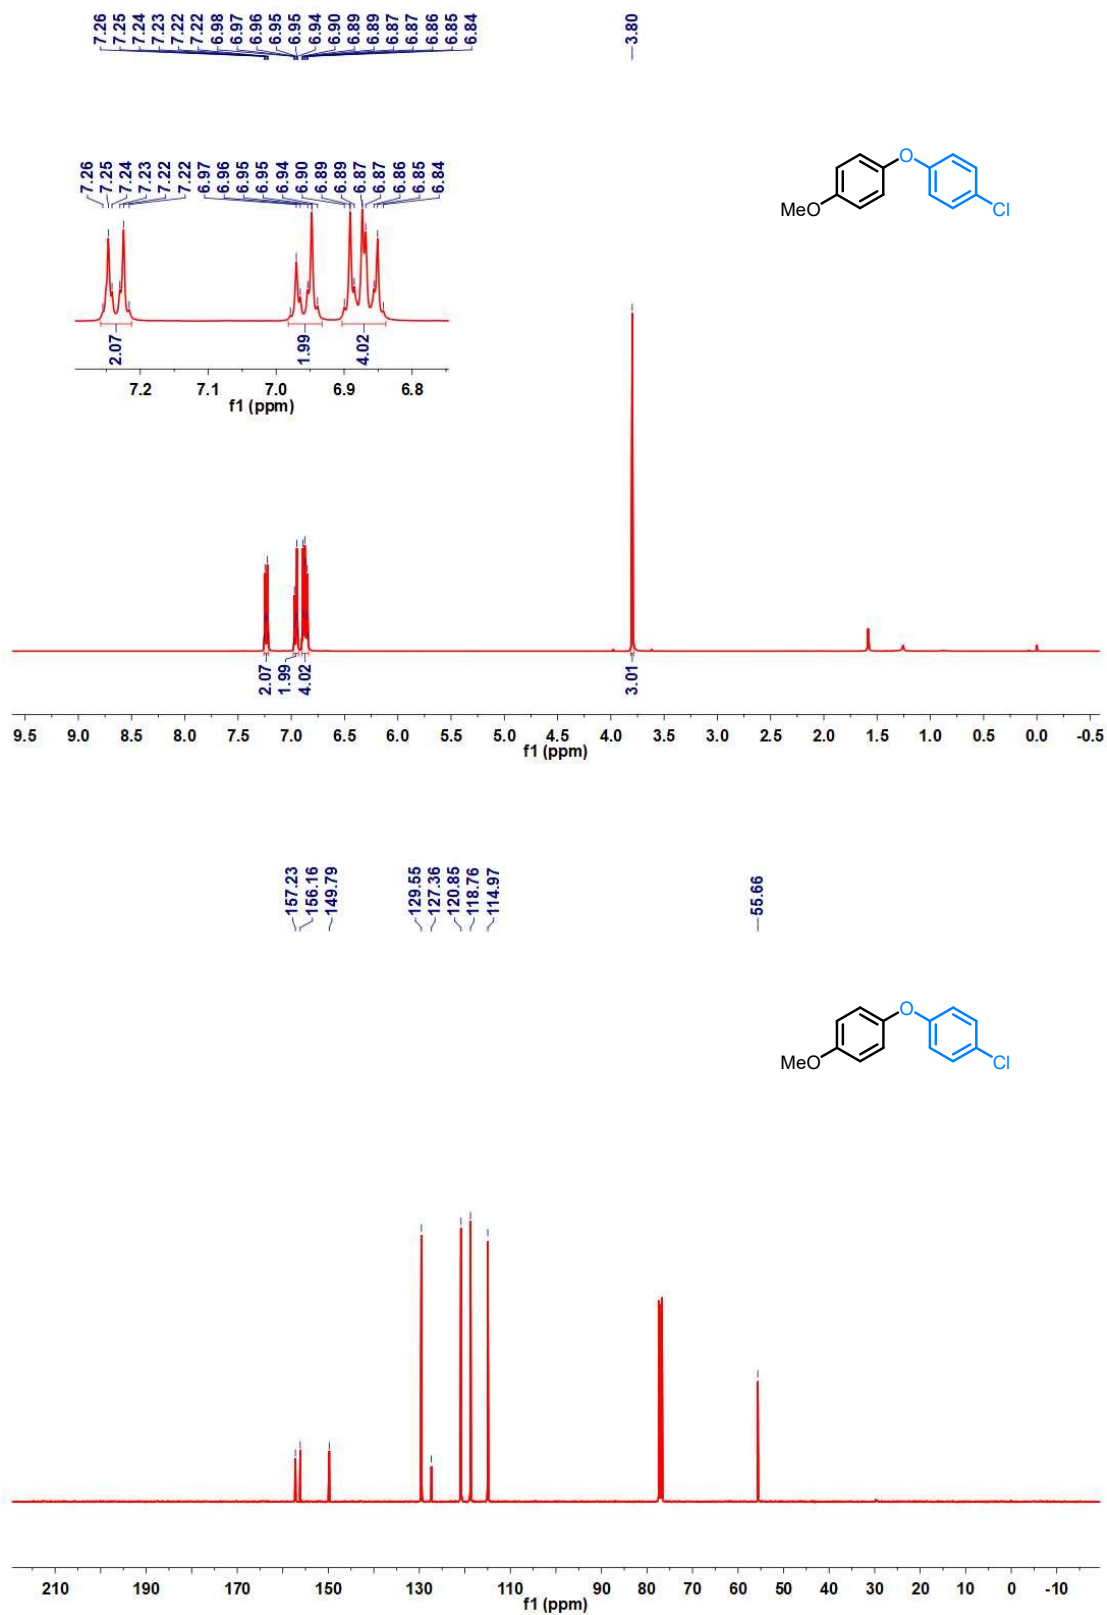

**Fig. S40.** The  $^1\text{H}$  (400 MHz) and  $^{13}\text{C}$  (101 MHz) NMR spectra for 4-((4-methyl-2-oxo-2H-chromen-7-yl)oxy)benzotrile (**C34**) in  $\text{CDCl}_3$ .

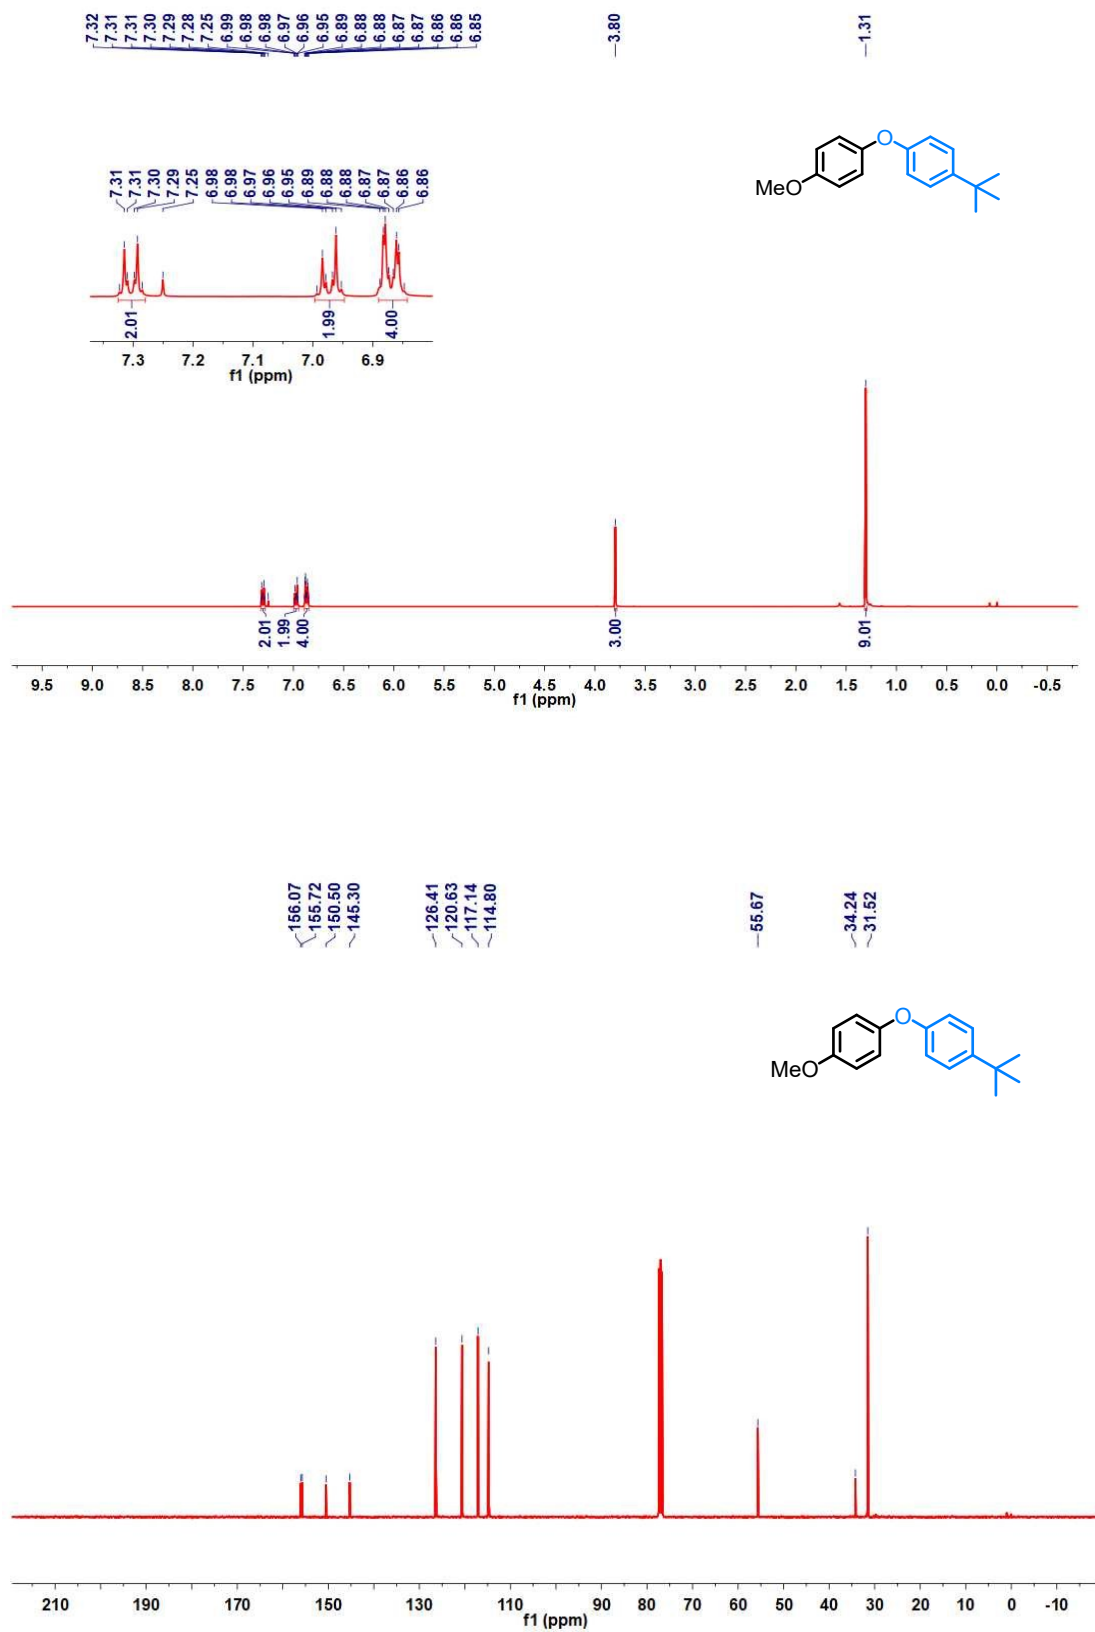

**Fig. S41.** The  $^1\text{H}$  (400 MHz) and  $^{13}\text{C}$  (101 MHz) NMR spectra for 4,4'-oxybis(methoxybenzene) (**C35**) in  $\text{CDCl}_3$ .

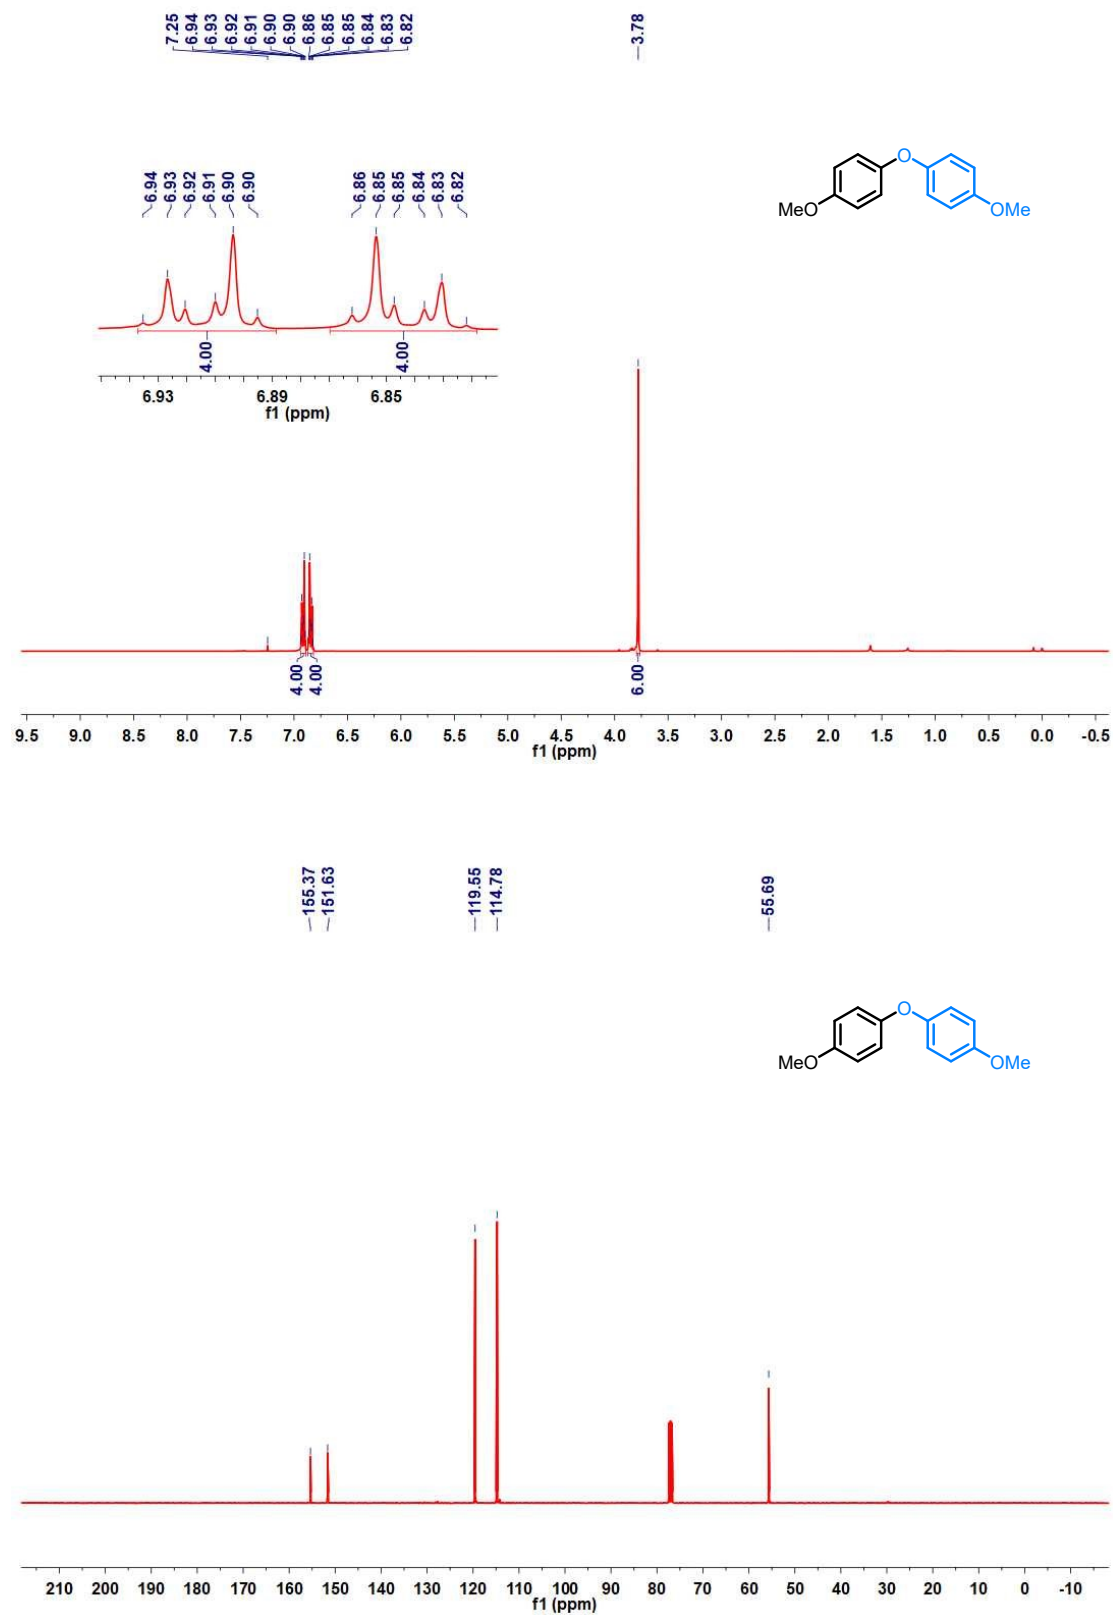

**Fig. S42.** The  $^1\text{H}$  (400 MHz) and  $^{13}\text{C}$  (101 MHz) NMR spectra for 4'-(4-methoxyphenoxy)-[1,1'-biphenyl]-4-carbonitrile (**C36**) in  $\text{CDCl}_3$ .

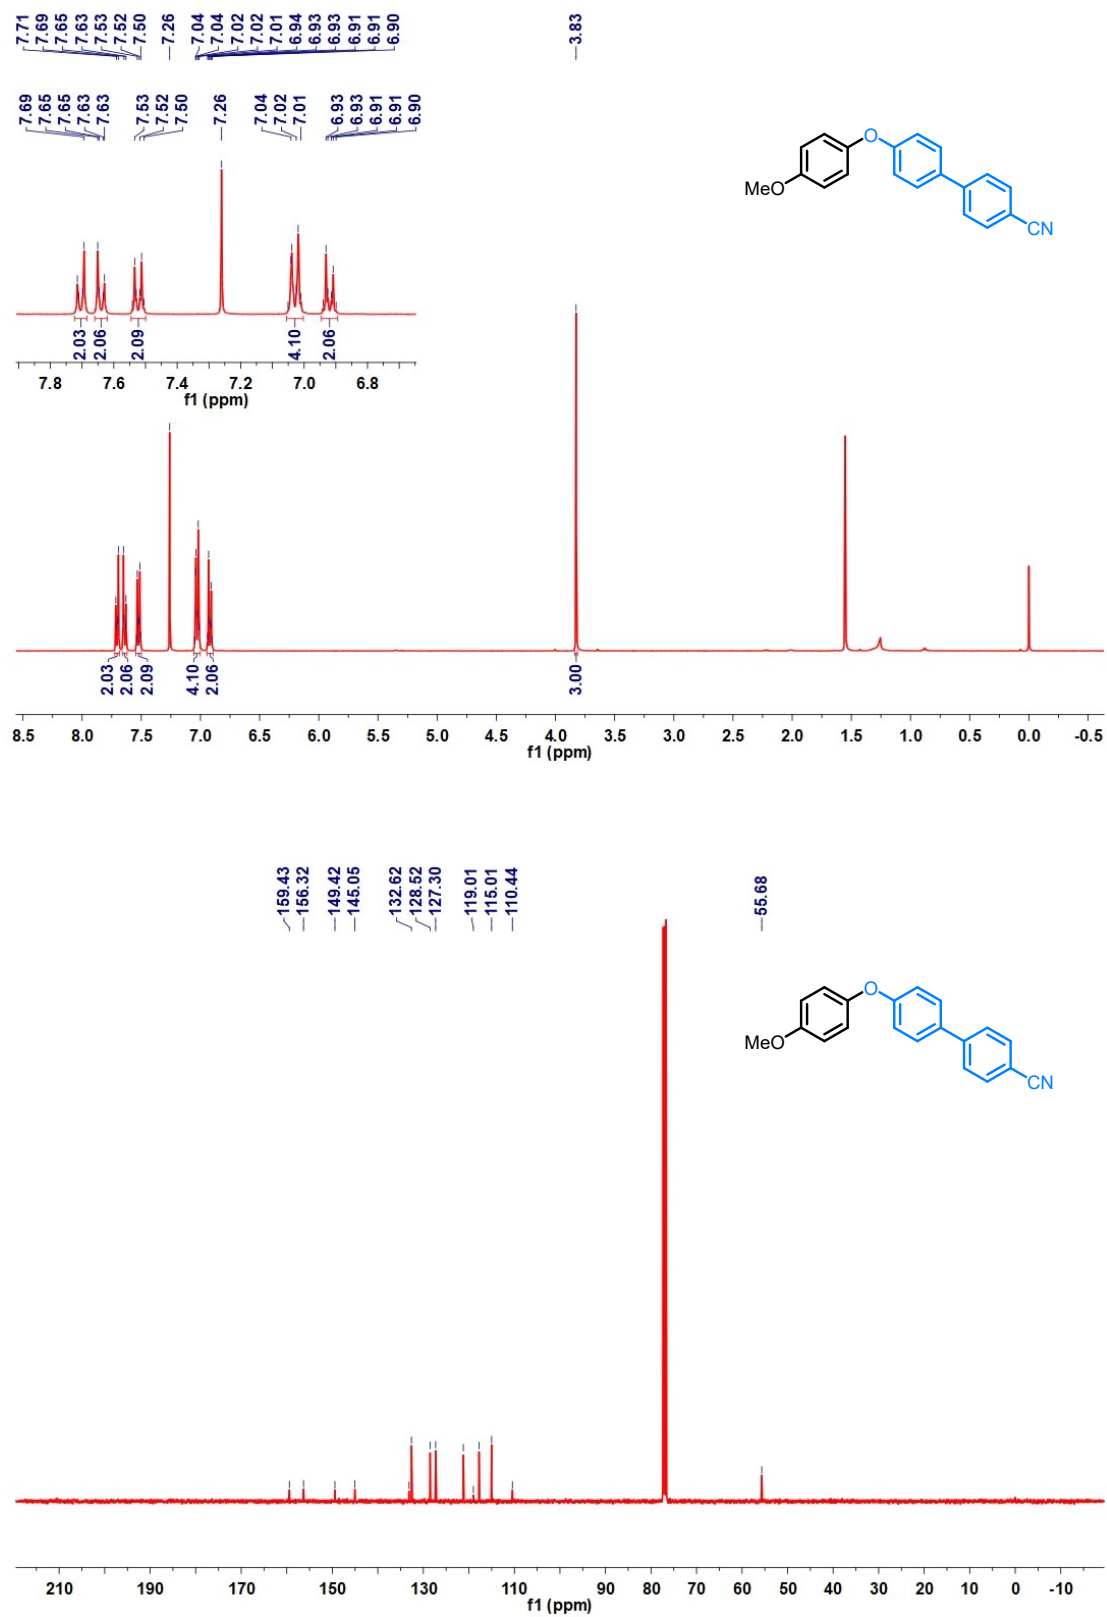



**Fig. S43.** The  $^1\text{H}$  (400 MHz),  $^{13}\text{C}$  (101 MHz) and  $^{19}\text{F}$  (377 MHz) NMR spectra for 4-(4-methoxyphenoxy)-2-(trifluoromethyl)benzonitrile (**C37**) in  $\text{CDCl}_3$ .

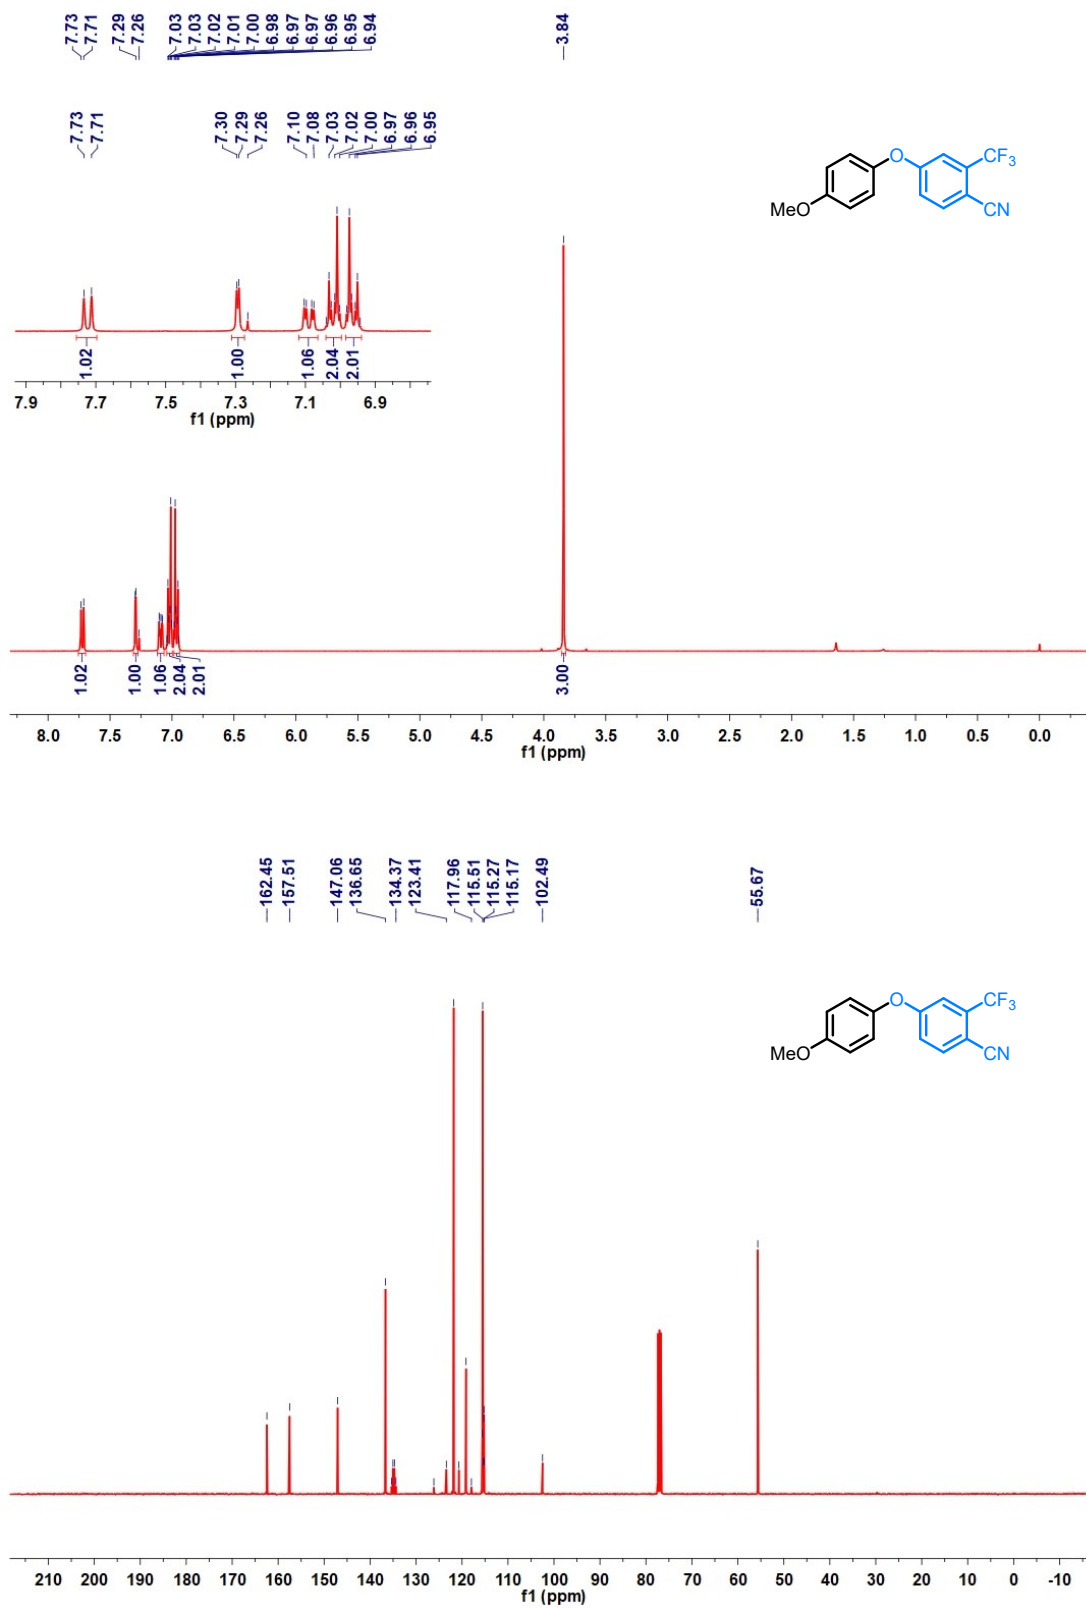

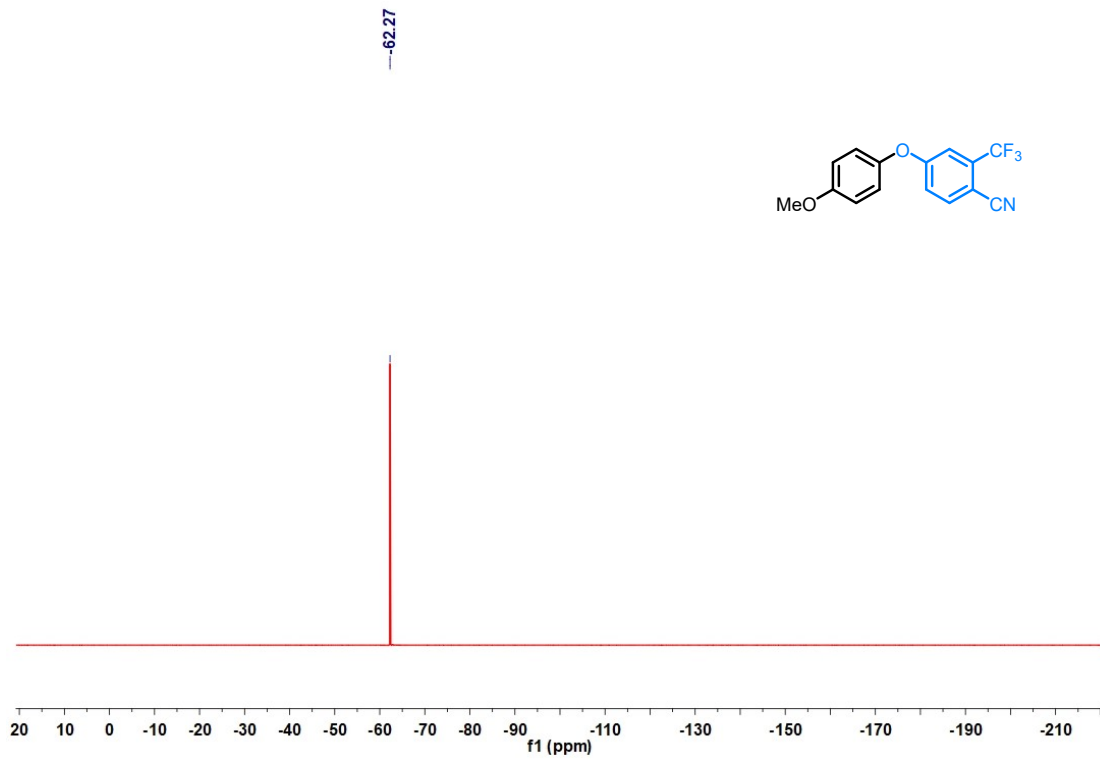

**Fig. S44.** The  $^1\text{H}$  (400 MHz),  $^{13}\text{C}$  (101 MHz) and  $^{19}\text{F}$  (377 MHz) NMR spectra for 1-(4-methoxyphenoxy)-3,5-bis(trifluoromethyl)benzene (**C38**) in  $\text{CDCl}_3$ .

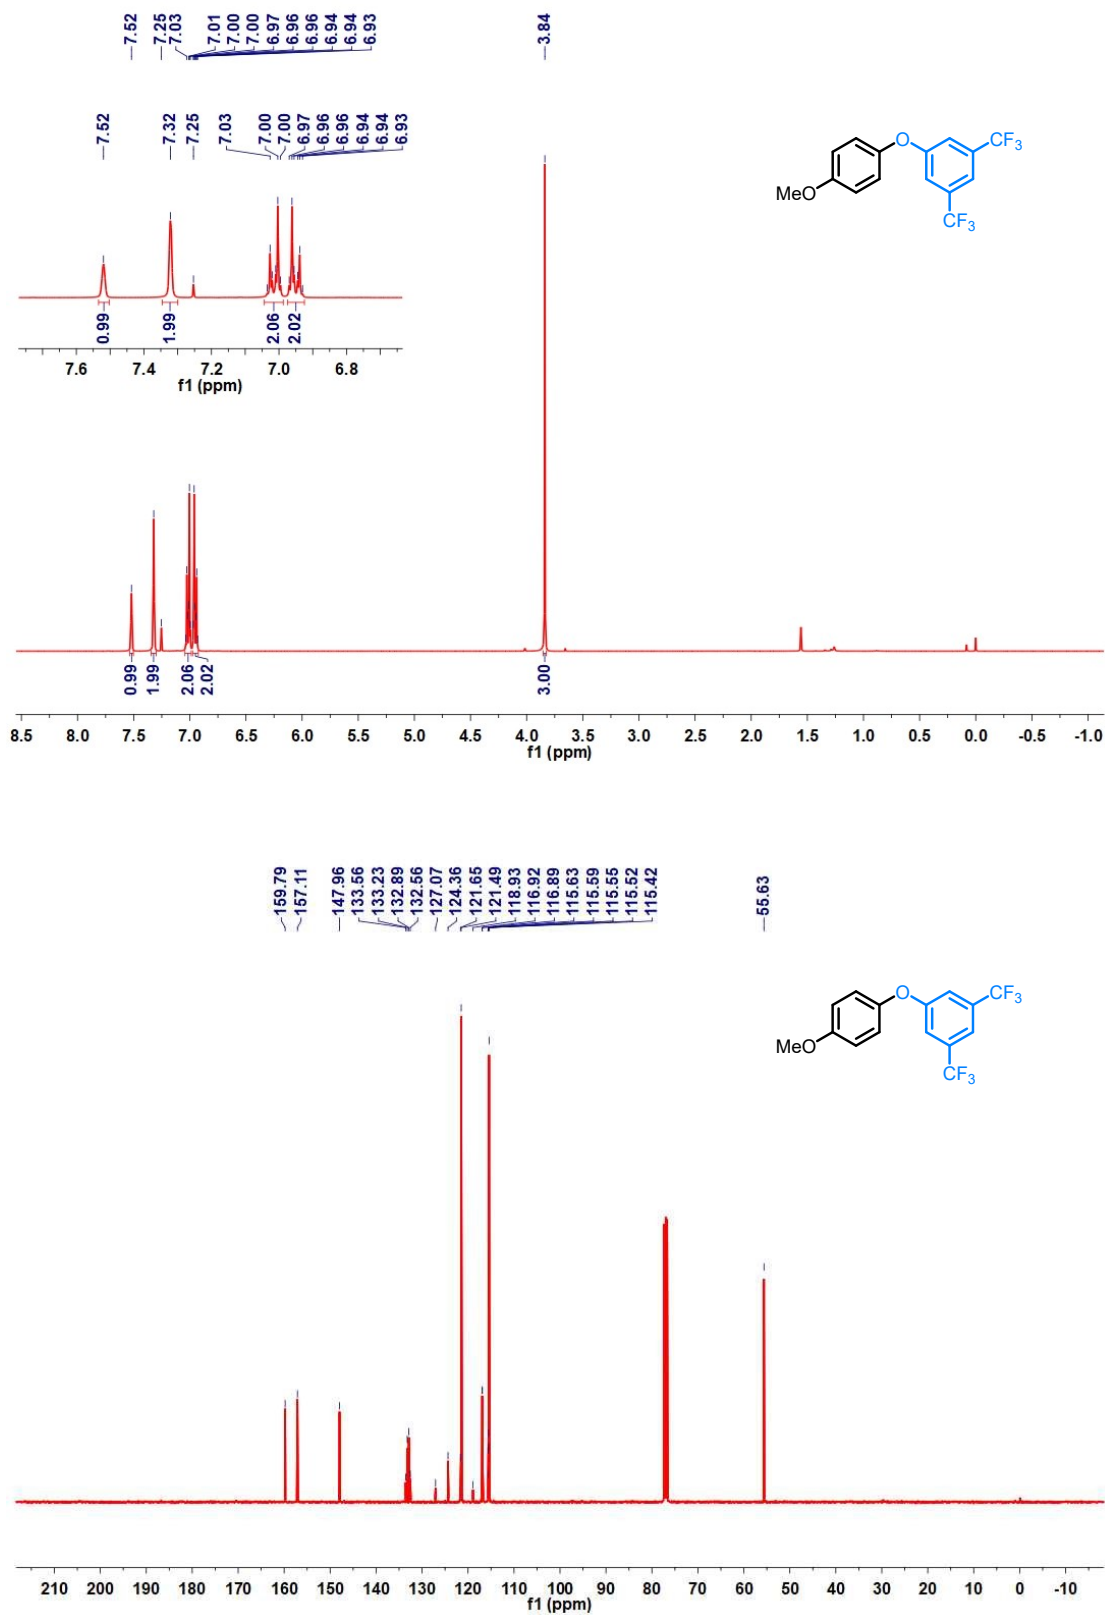

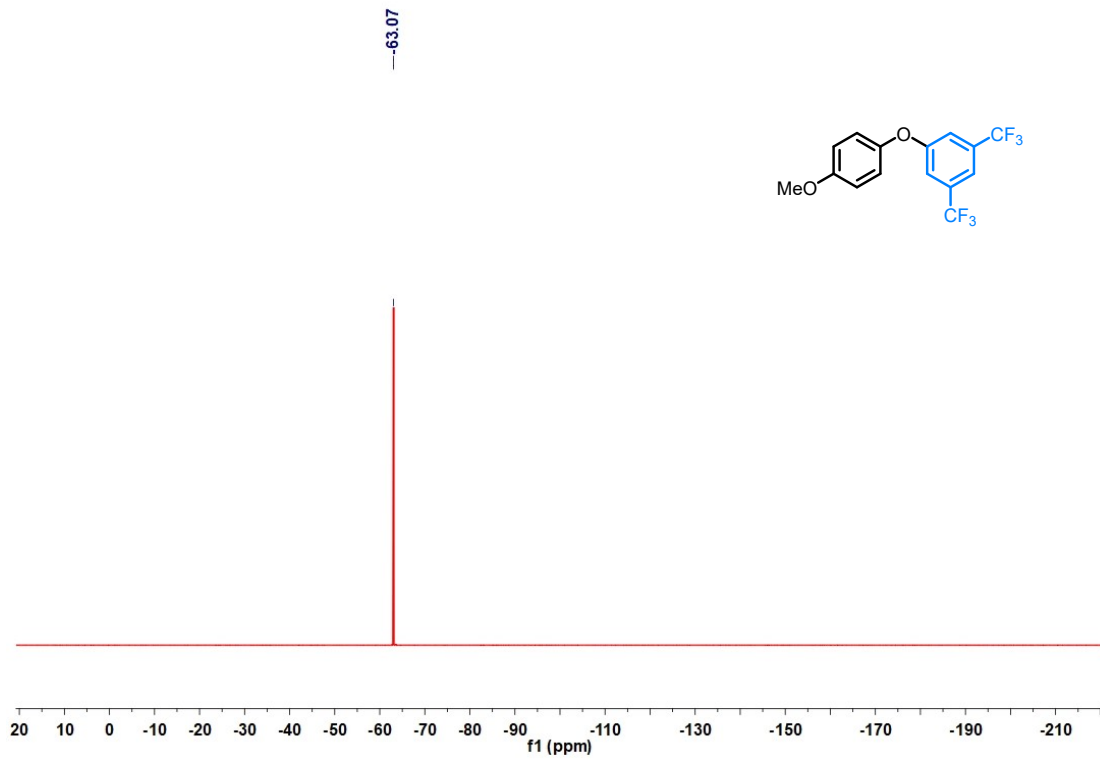

**Fig. S45.** The  $^1\text{H}$  (400 MHz) and  $^{13}\text{C}$  (101 MHz) NMR spectra for 2-(4-methoxyphenoxy)benzonitrile (**C39**) in  $\text{CDCl}_3$ .

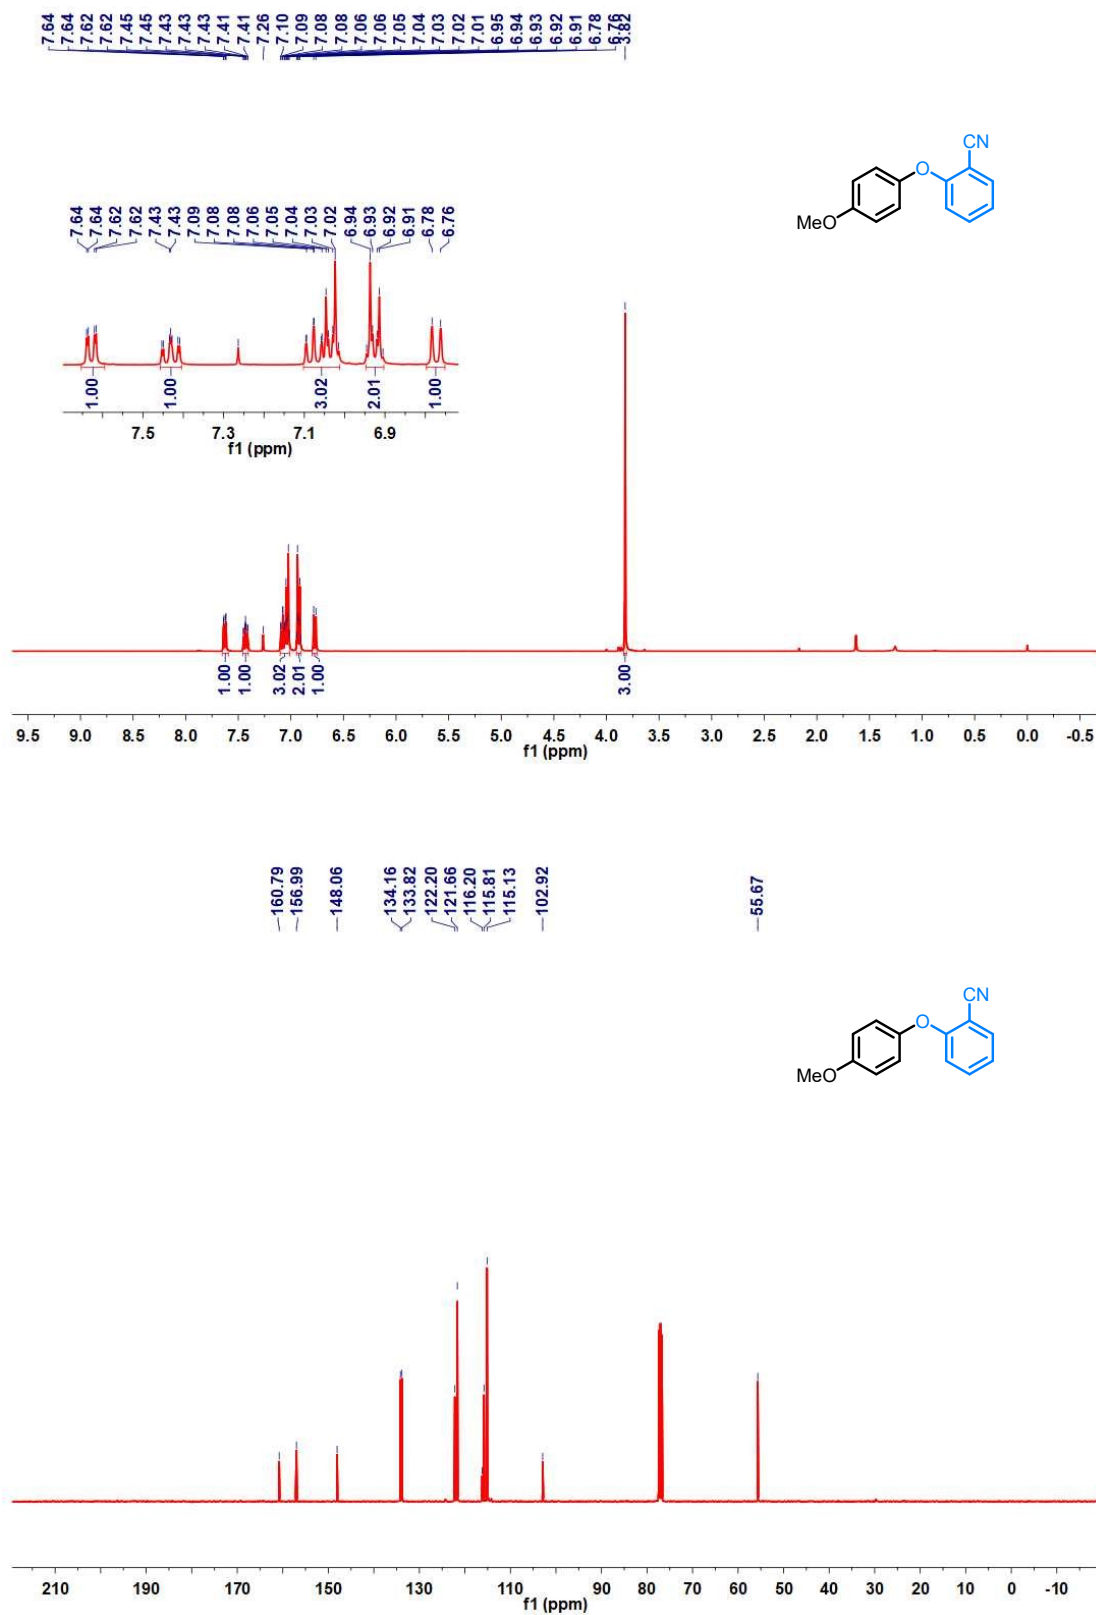

**Fig. S46.** The  $^1\text{H}$  (400 MHz) and  $^{13}\text{C}$  (101 MHz) spectra for 2,4-dichloro-1-(4-methoxyphenoxy)benzene (**C40**) in  $\text{CDCl}_3$ .

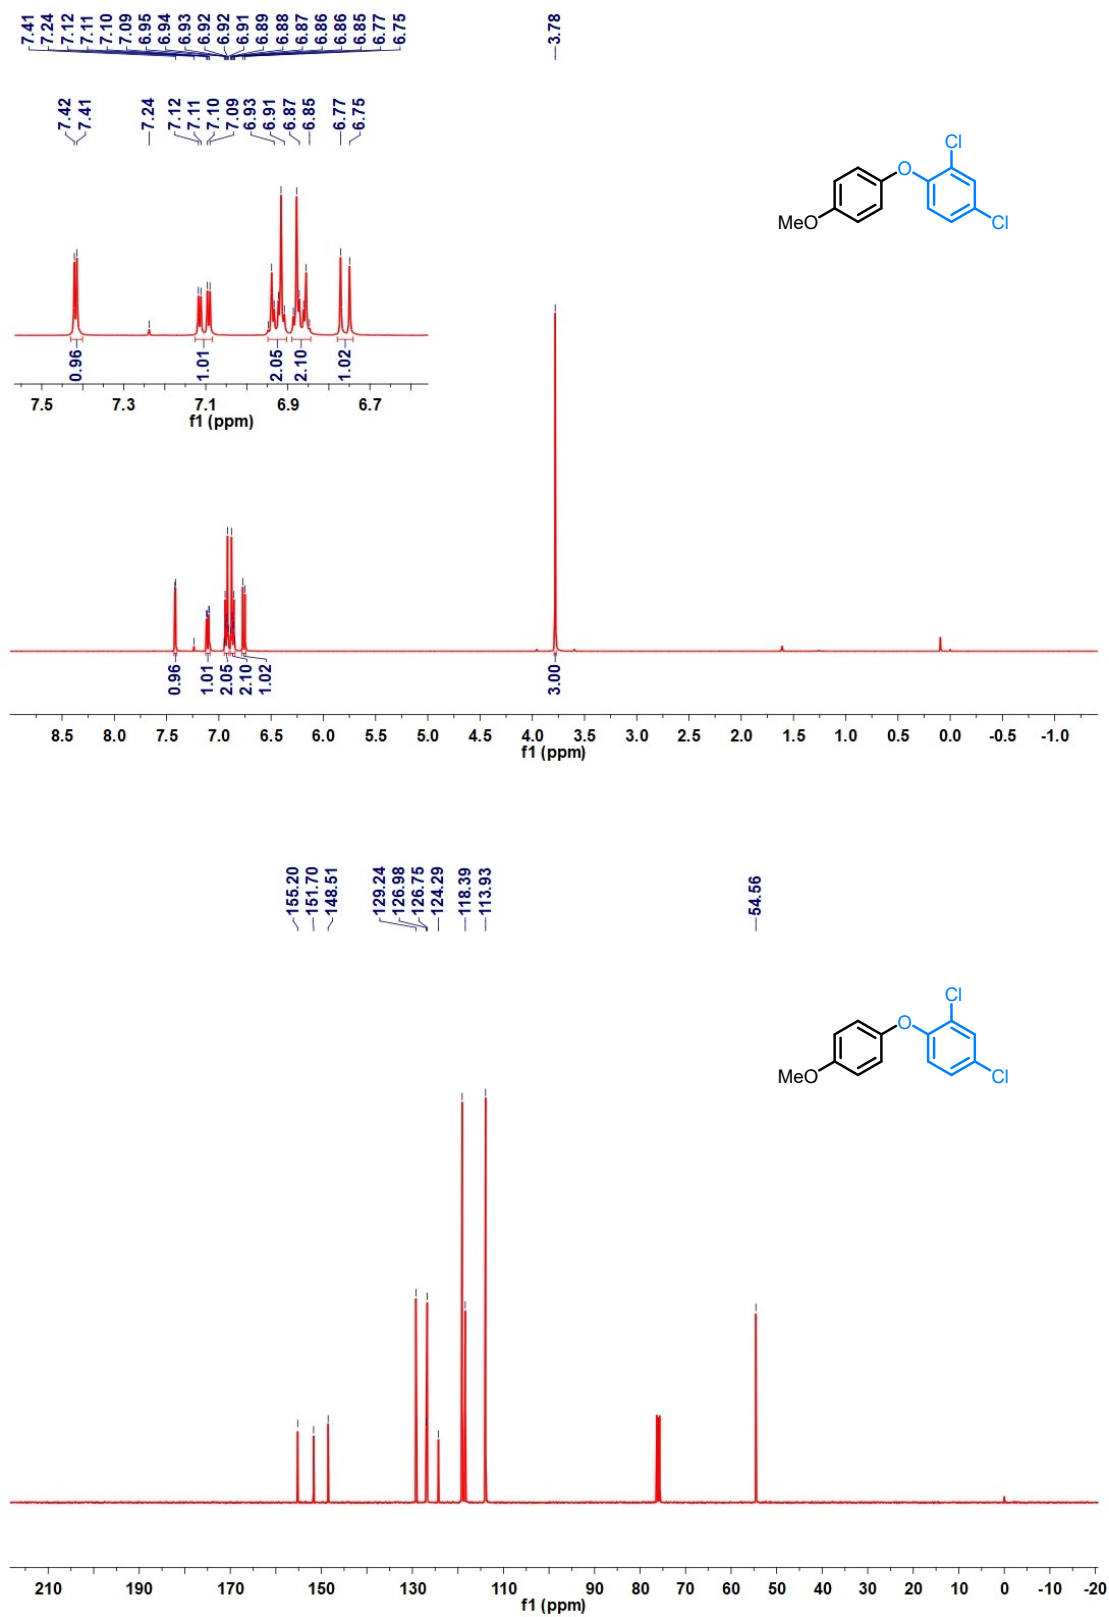

**Fig. S47.** The  $^1\text{H}$  (400 MHz) and  $^{13}\text{C}$  (101 MHz) spectra for methyl 4-methoxy-3-(4-methoxyphenoxy)benzoate (**C41**) in  $\text{CDCl}_3$ .

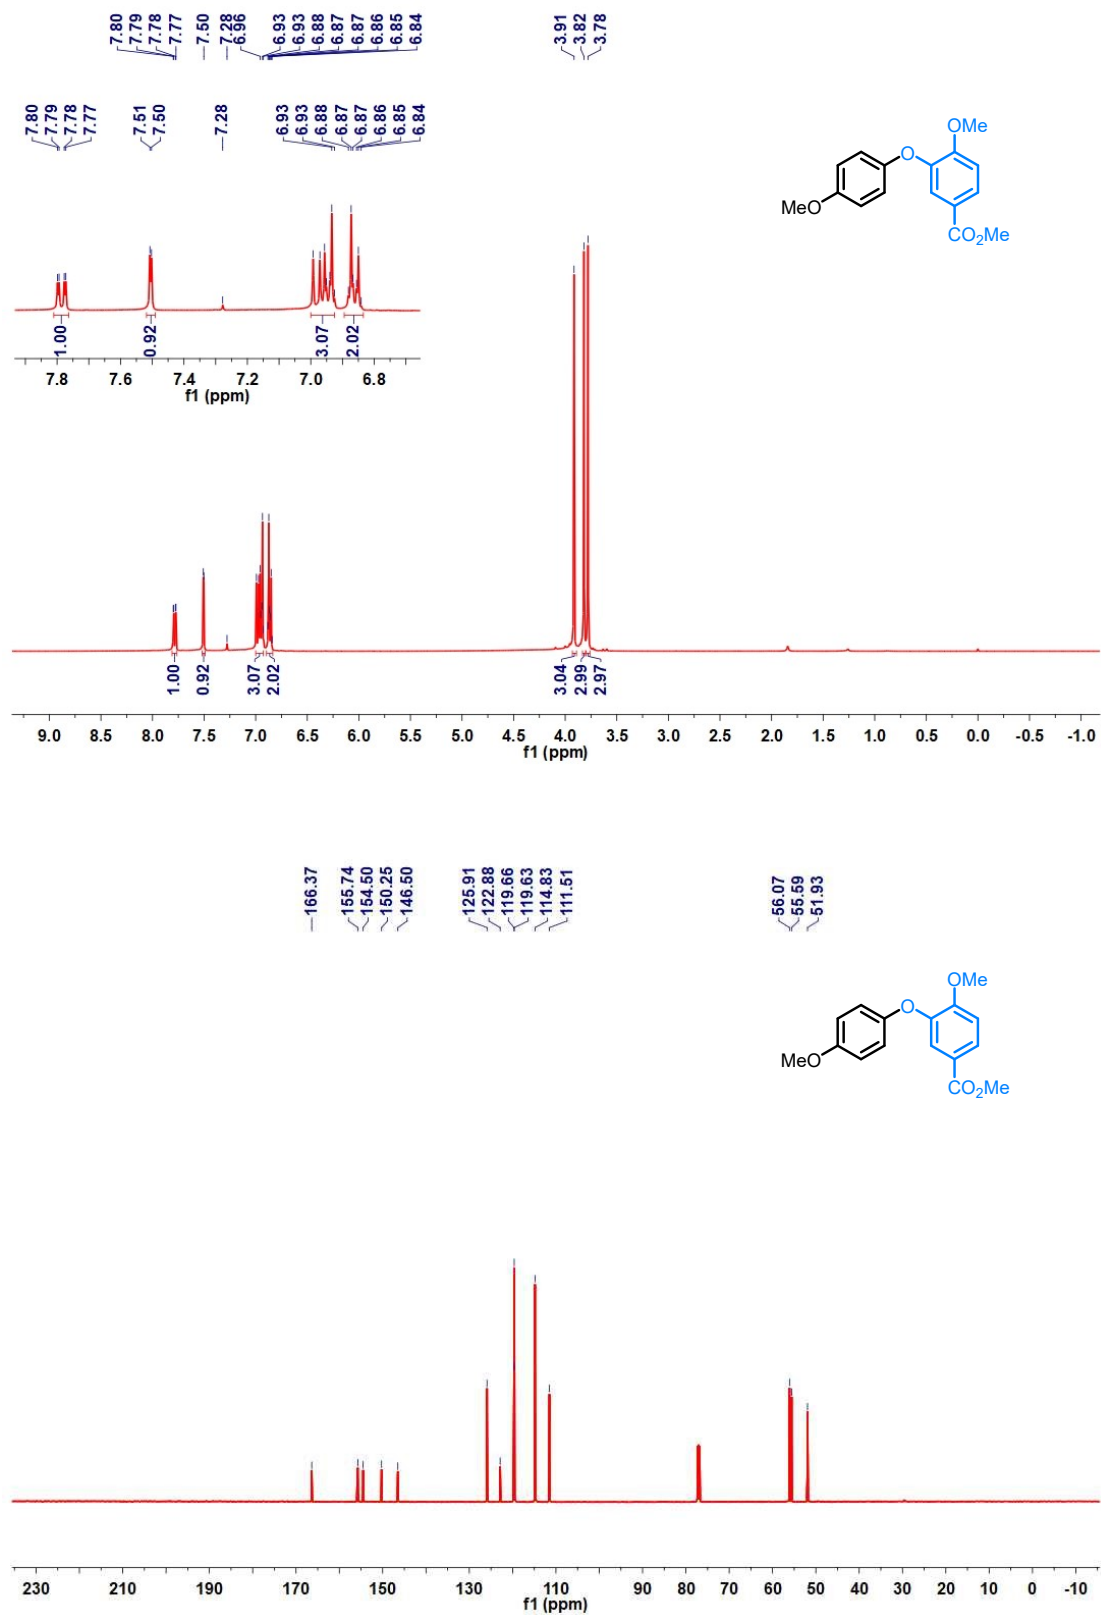

**Fig. S48.** The  $^1\text{H}$  (400 MHz) and  $^{13}\text{C}$  (101 MHz) NMR spectra for 4-allyl-2-methoxy-1-(4-methoxyphenoxy)benzene (**C42**) in  $\text{CDCl}_3$ .

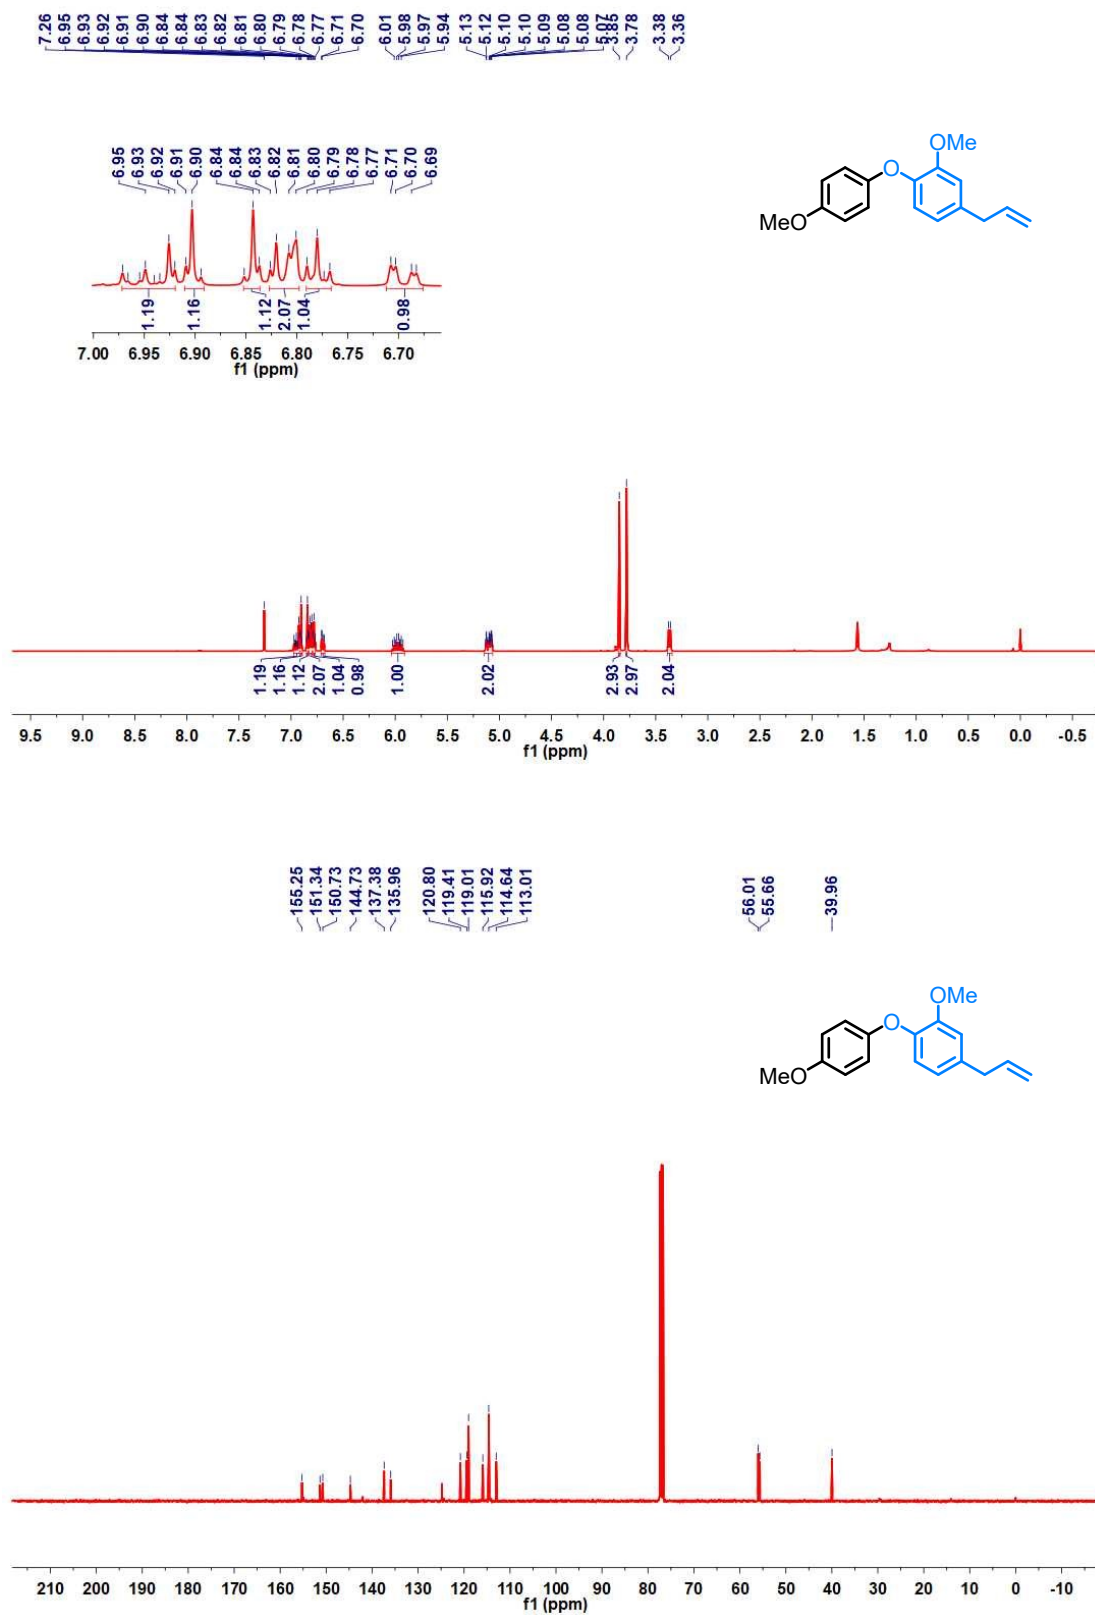



**Fig. S49.** The  $^1\text{H}$  (400 MHz) and  $^{13}\text{C}$  (101 MHz) NMR spectra for 2-(4-methoxyphenoxy)-1,3,5-trimethylbenzene (**C43**) in  $\text{CDCl}_3$ .

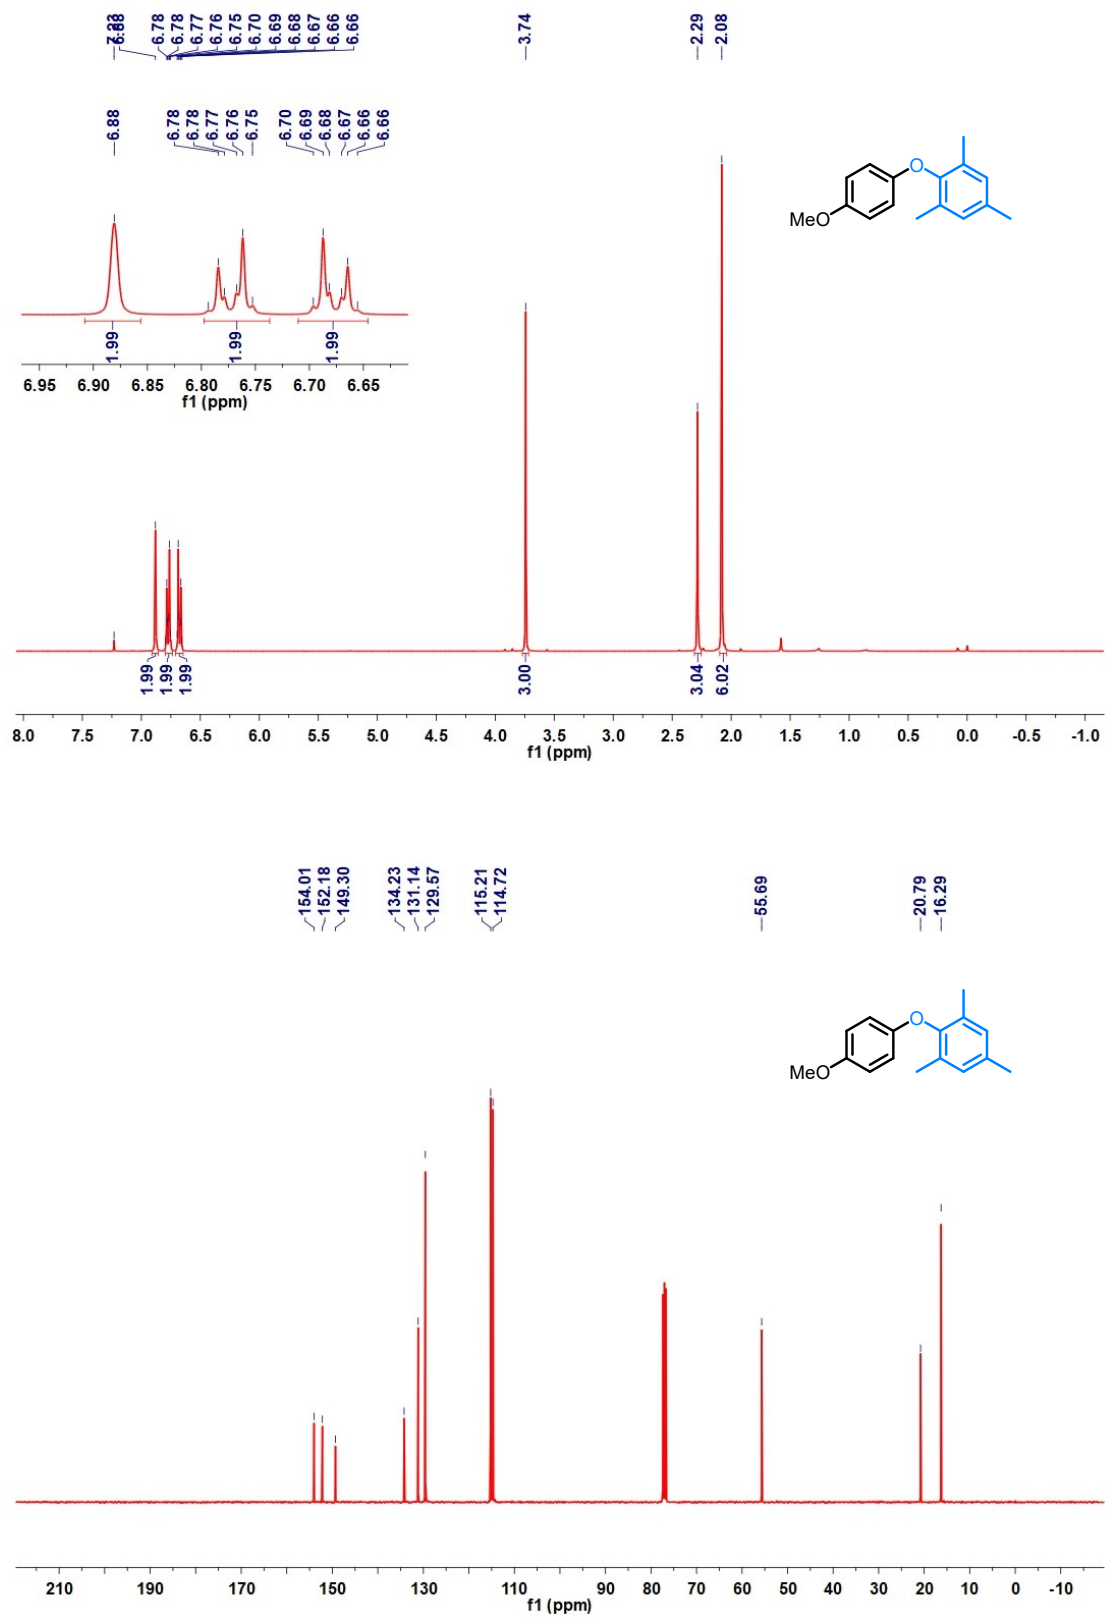

**Fig. S50.** The  $^1\text{H}$  (400 MHz) and  $^{13}\text{C}$  (101 MHz) NMR spectra for 3,5-di-tert-butyl-4'-methoxy-1-methyl-[1,1'-biphenyl]-4(1H)-one (**C44'**) in  $\text{CDCl}_3$ .

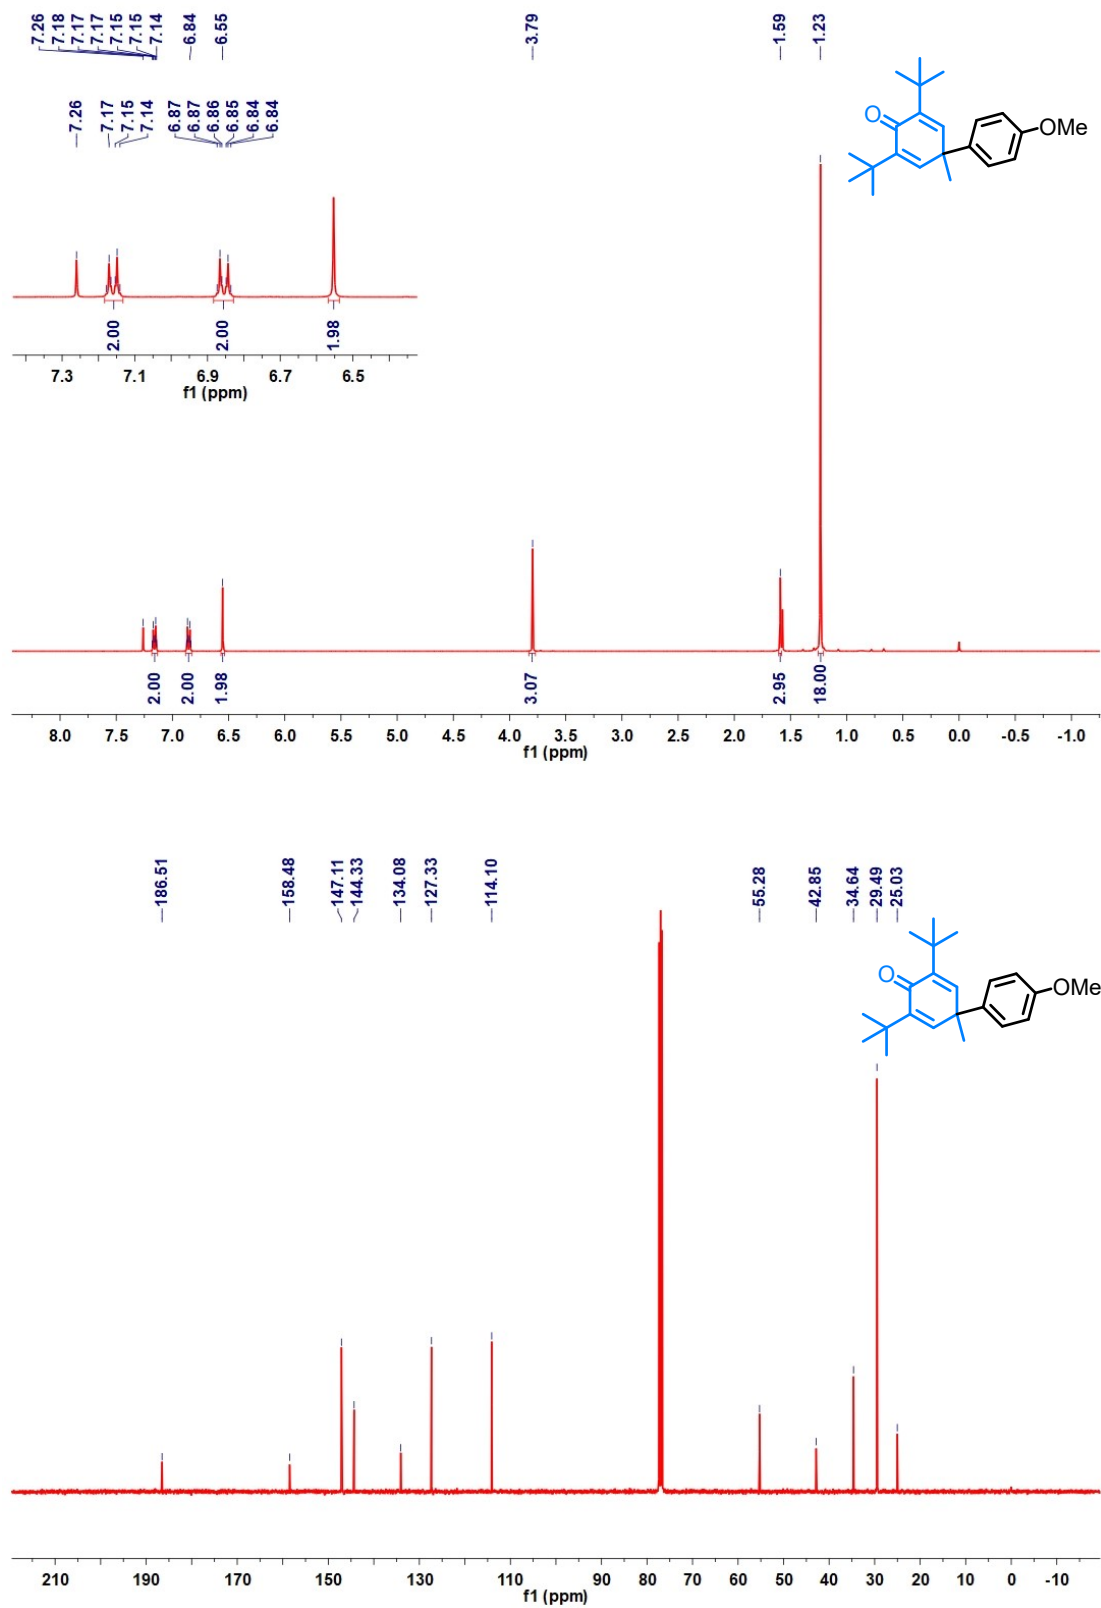

**Fig. S51.** The  $^1\text{H}$  (400 MHz) and  $^{13}\text{C}$  (101 MHz) NMR spectra for methyl 3-(4-methoxyphenoxy)quinoline (**C45**) in  $\text{CDCl}_3$ .

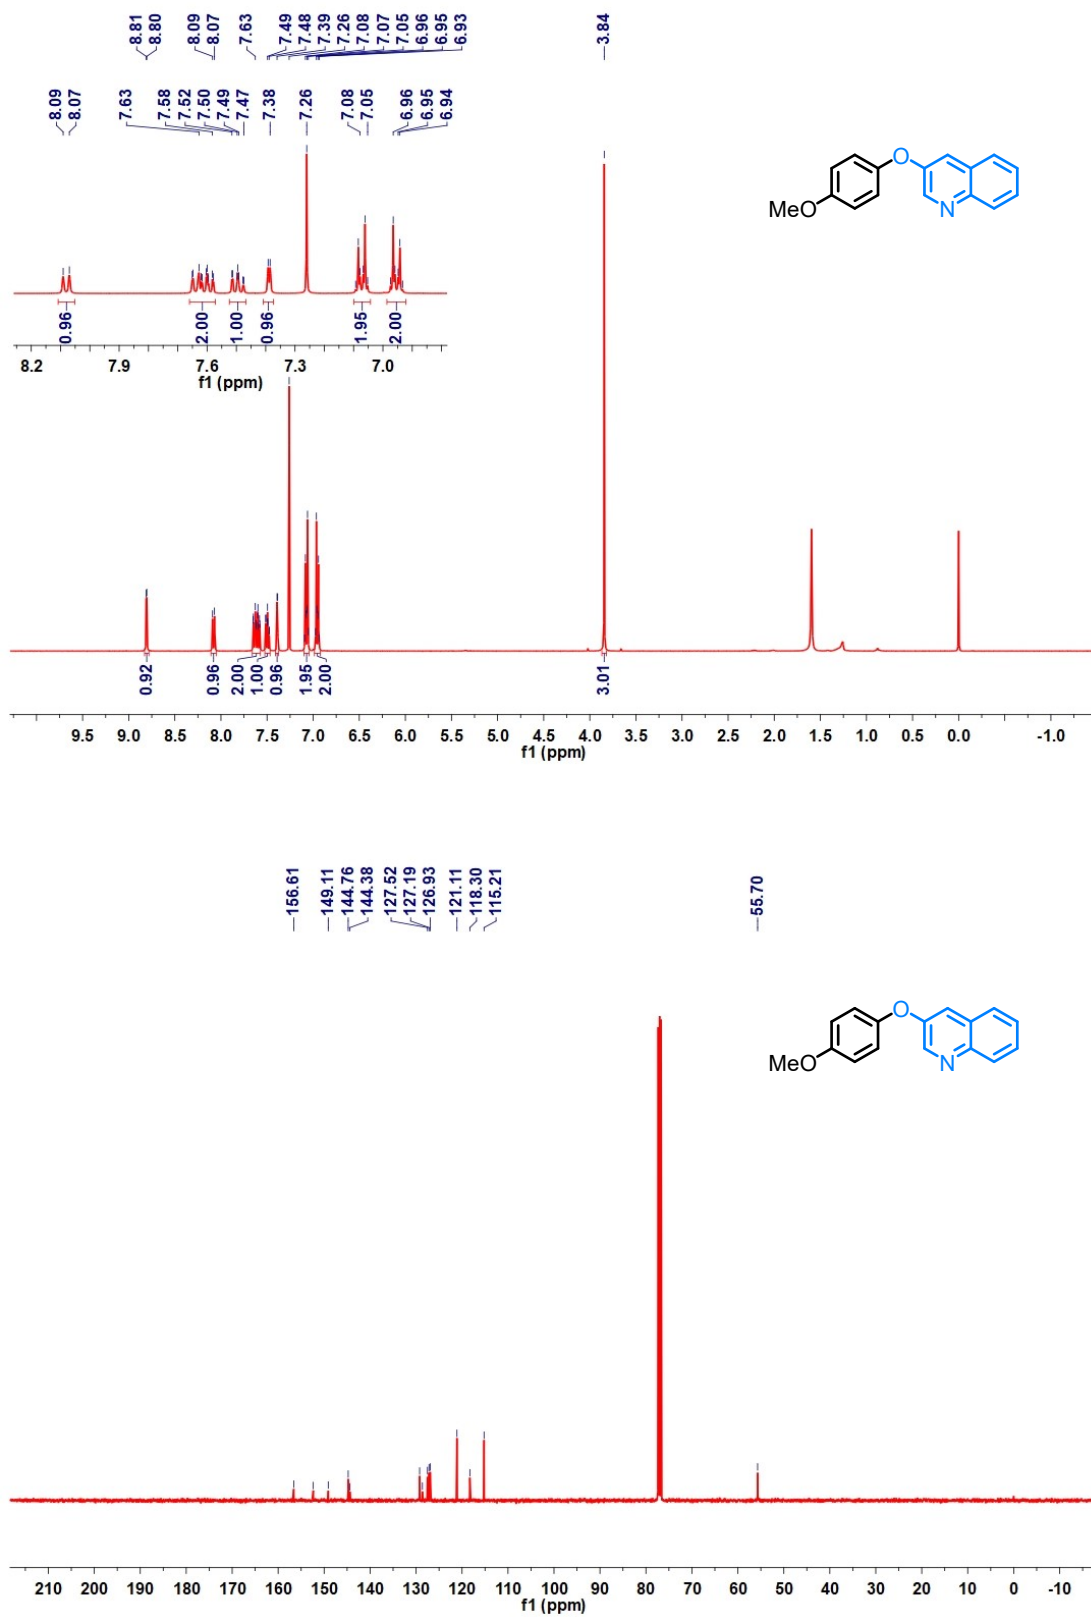

**Fig. S52.** The  $^1\text{H}$  (400 MHz) and  $^{13}\text{C}$  (101 MHz) NMR spectra for methyl (S)-2-((tert-butoxycarbonyl)amino)-3-(4-(4-methoxyphenoxy)phenyl)propanoate (**C46**) in  $\text{CDCl}_3$ .

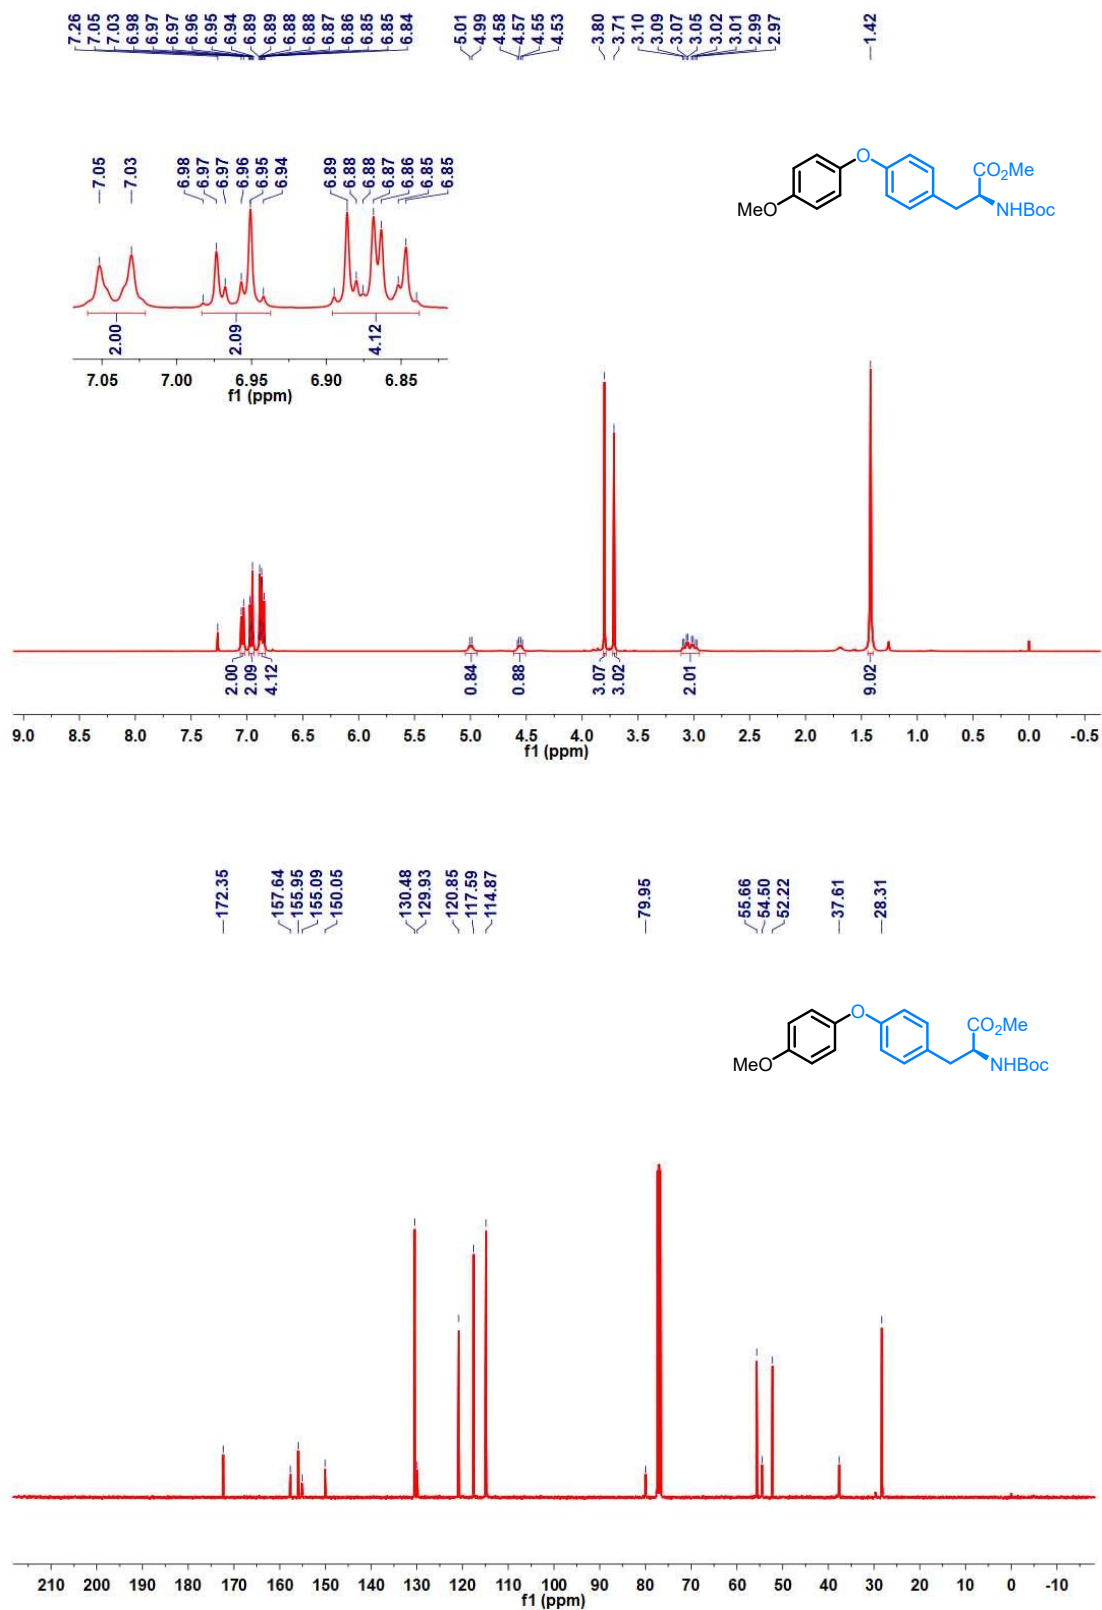

**Fig. S53.** The  $^1\text{H}$  (400 MHz) and  $^{13}\text{C}$  (101 MHz) NMR spectra for (8R,9S,13S,14S)-3-(4-methoxyphenoxy)-13-methyl-6,7,8,9,11,12,13,14,15,16-decahydro-17H-cyclopenta[a]phenanthren-17-one (C47) in  $\text{CDCl}_3$ .

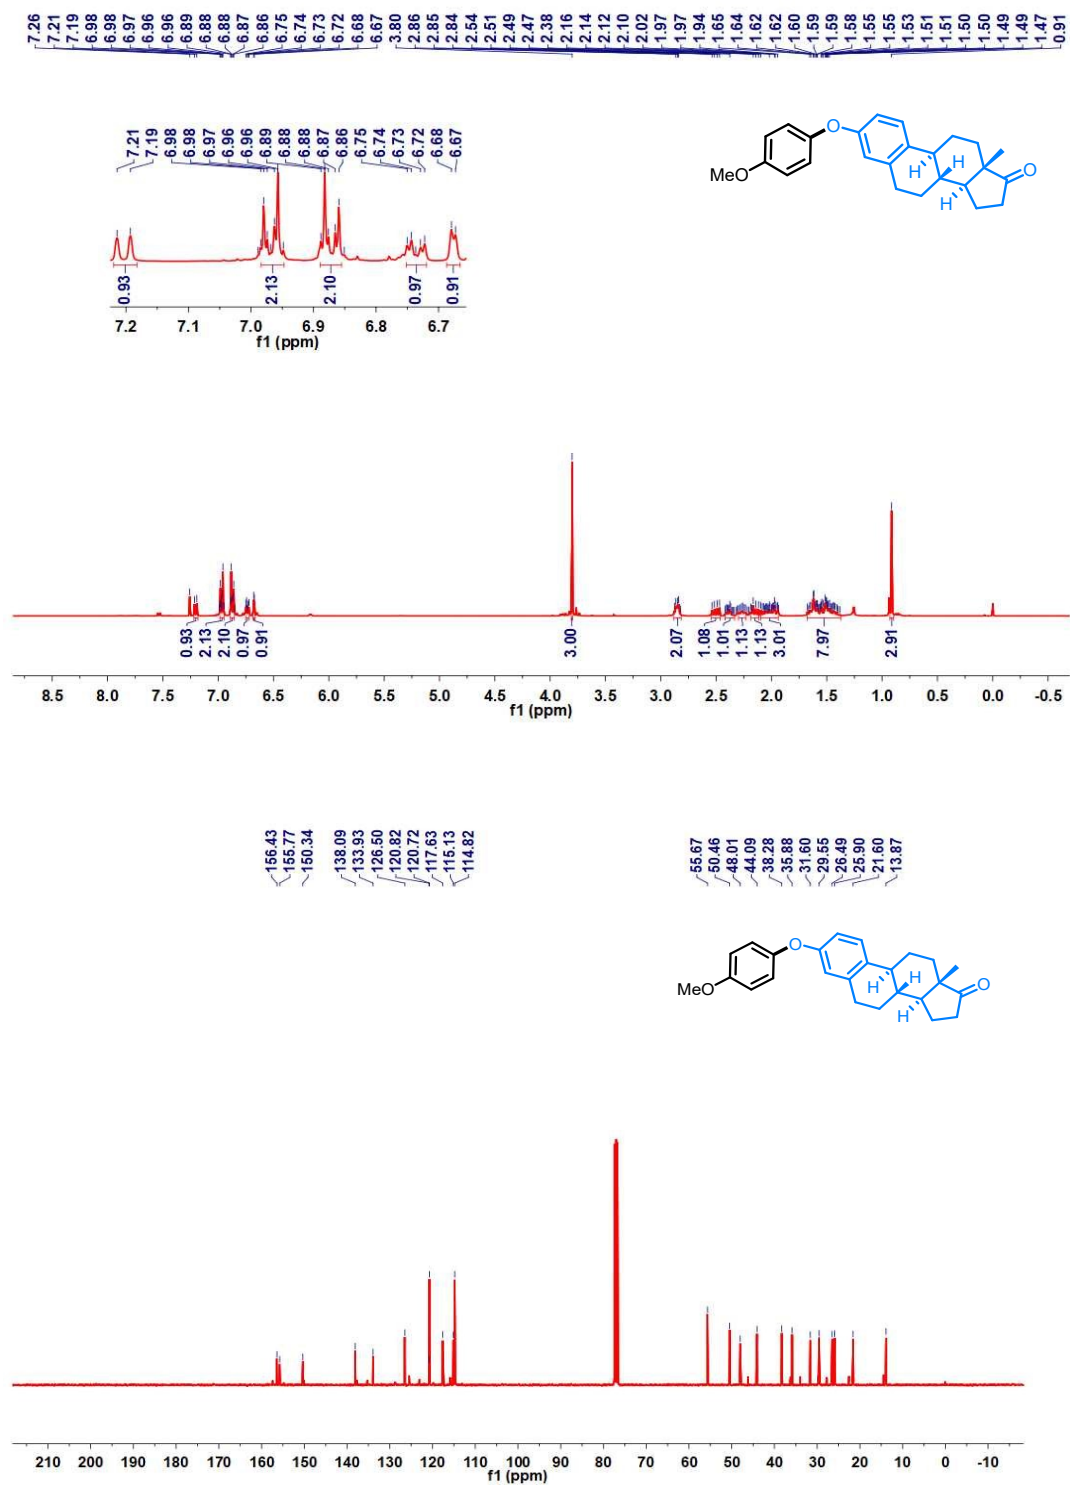

**Fig. S54.** The  $^1\text{H}$  (400 MHz) and  $^{13}\text{C}$  (101 MHz) NMR spectra for methyl 4-methoxy-3-(4-(methoxycarbonyl)phenoxy)benzoate (**Aristogin C**) in  $\text{CDCl}_3$ .

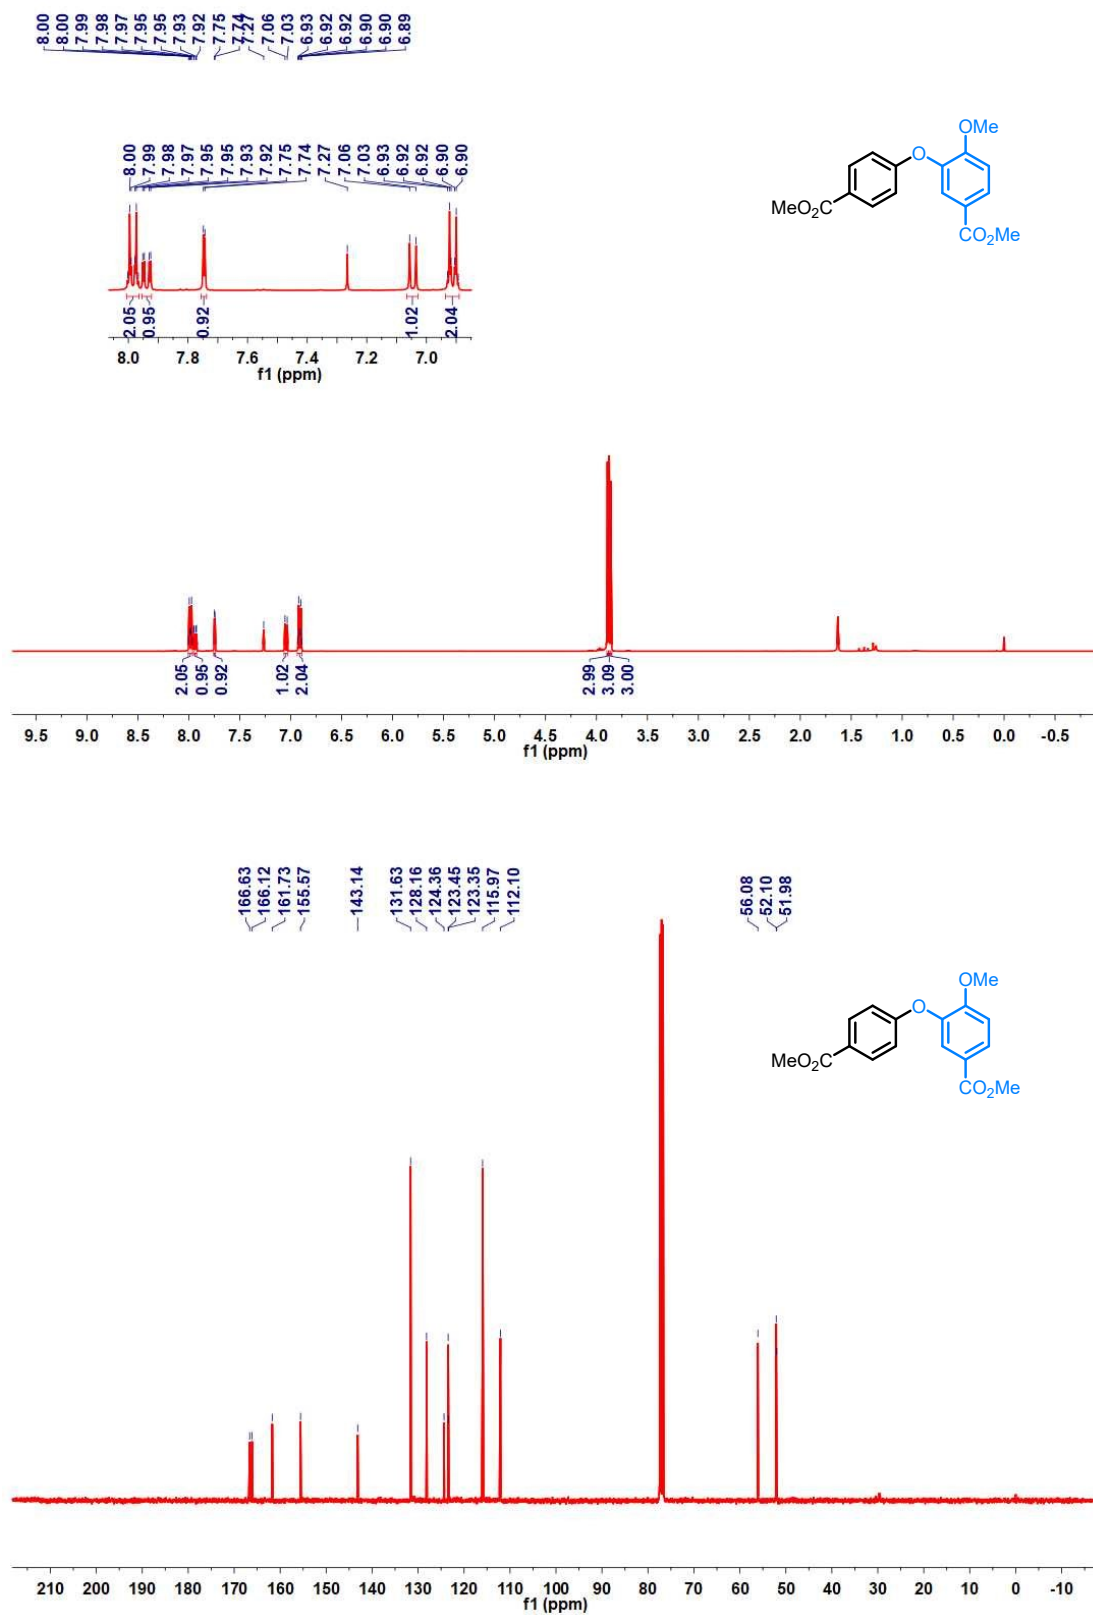

**Fig. S55.** The  $^1\text{H}$  (400 MHz) and  $^{13}\text{C}$  (101 MHz) NMR spectra for 4-([1,1'-biphenyl]-4-yloxy)benzonitrile (**C49**) in  $\text{CDCl}_3$ .

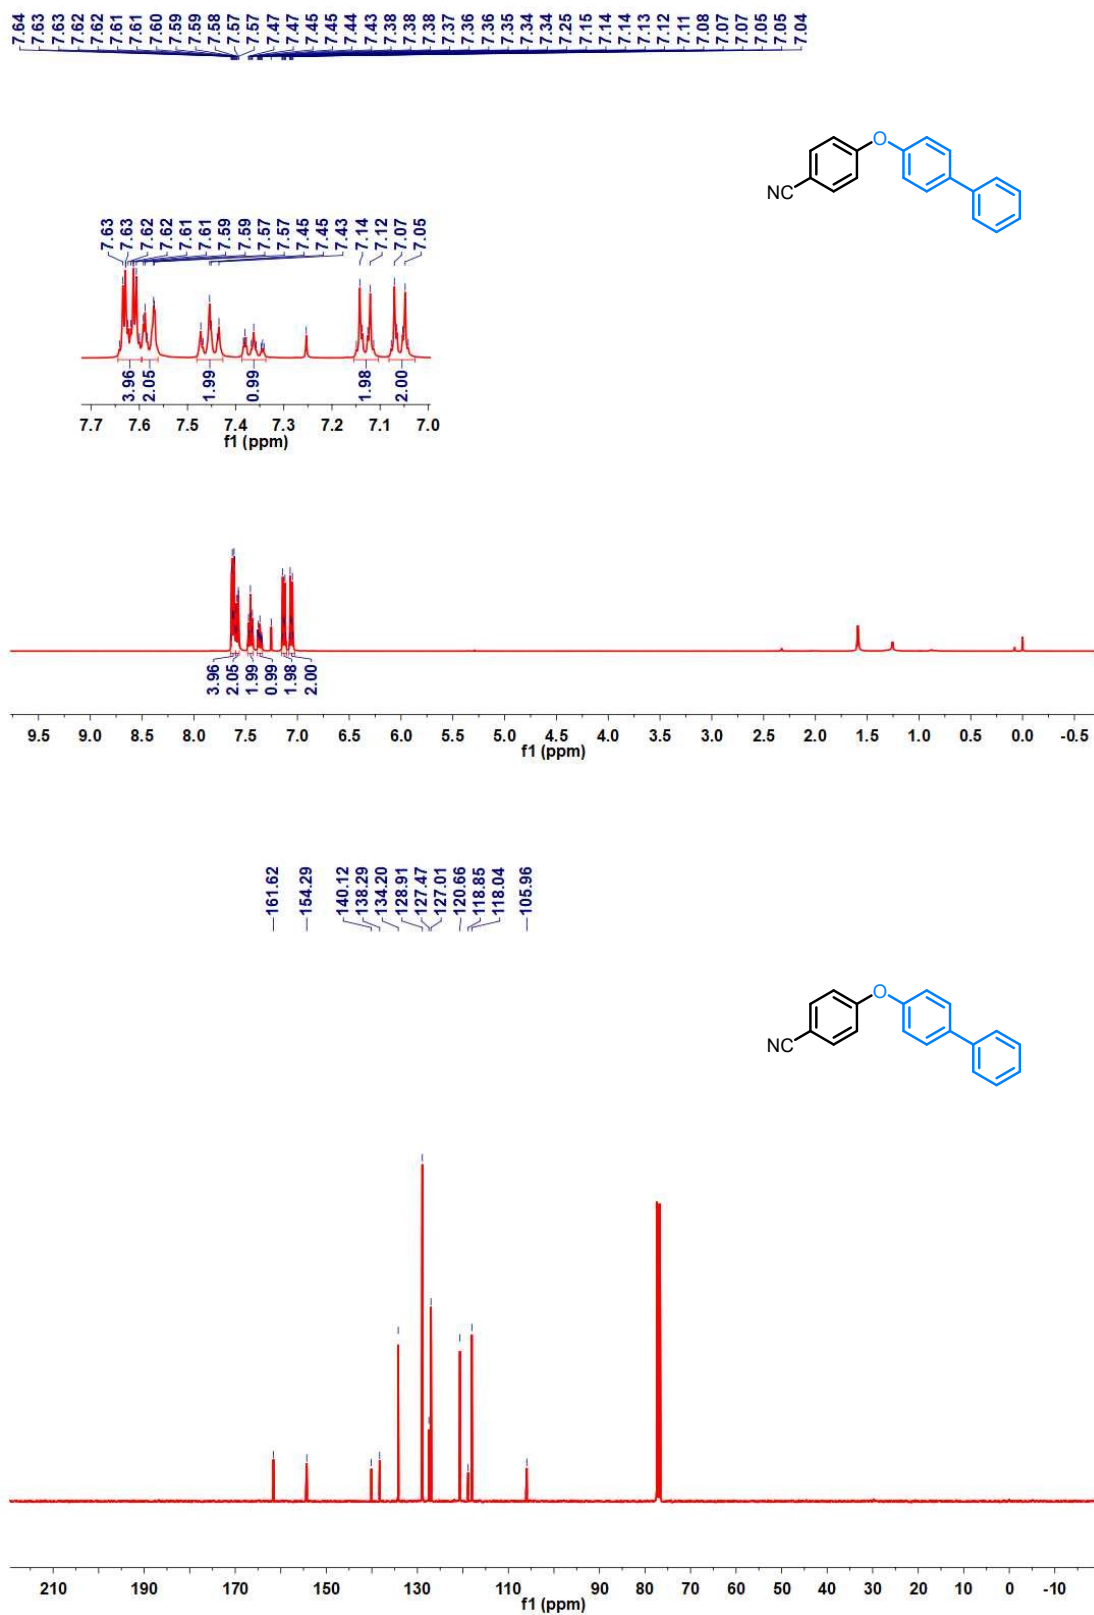

**Figure S56.** The  $^1\text{H}$  (400 MHz) and  $^{13}\text{C}$  (101 MHz) NMR spectra for (E)-4-hydroxy-3-((4-methoxyphenyl)diazenyl)benzonitrile (**D1**) in  $\text{CDCl}_3$ .

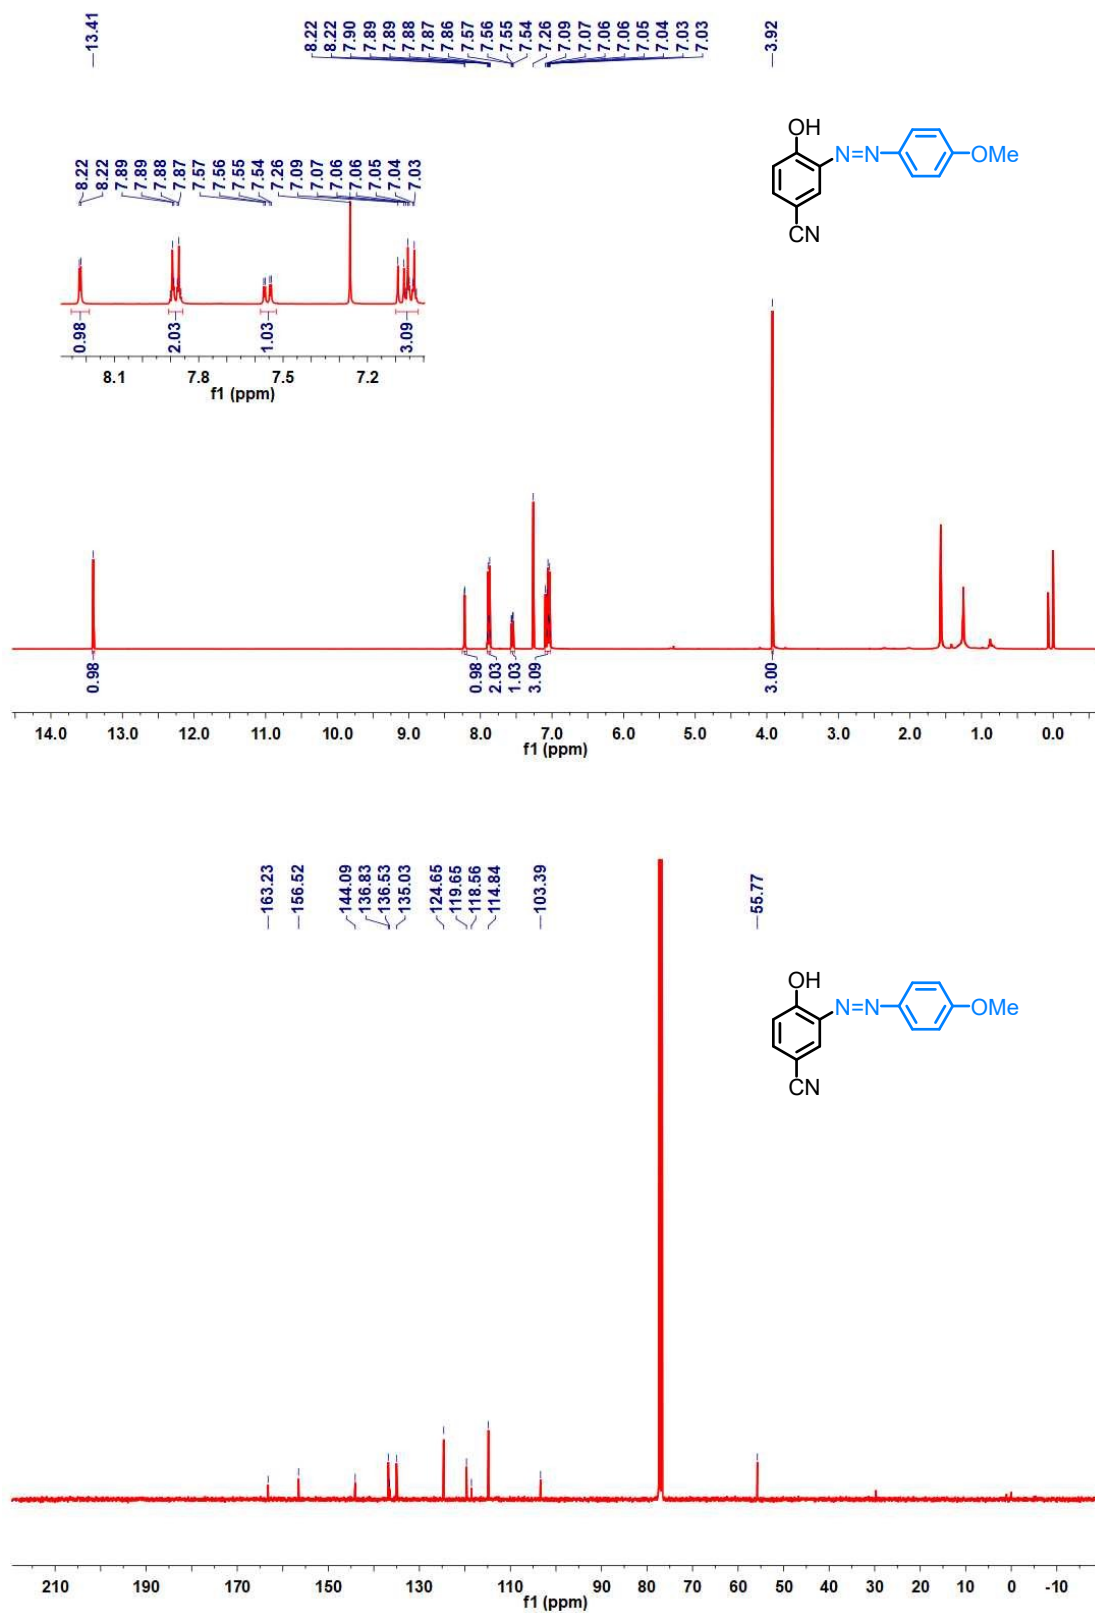

Supplement: d3gc02541a1.pdf [file d3gc02541a1.pdf]
